# Supplementary material
Source: PubMed Central journal article supplement (PMC3047454)

## **Supporting Information: Spectra**

### **Synthesis of Complex Allylic Esters via C—H Oxidation vs C—C Bond Formation**

Nicolaas A. Vermeulen, Jared H. Delcamp and M. Christina White  
Roger Adams Laboratory, Department of Chemistry, University of Illinois, Urbana, Illinois 61801

STANDARD PROTON PARAMETERS

Pulse Sequence: s2pul1

Solvent: CDCl3  
Ambient temperature  
INOVA-500 "u1500hp"

Relax. delay 10.000 sec  
Pulse 90.0 degrees  
Acq. time 4.096 sec  
Width 8000.0 Hz

4 repetitions

OBSERVE H1, 500.0677640 MHz

DATA PROCESSING

Line broadening 0.3 Hz

FT size 65536

Total time 3 min, 45 sec

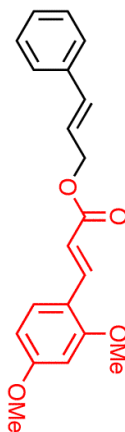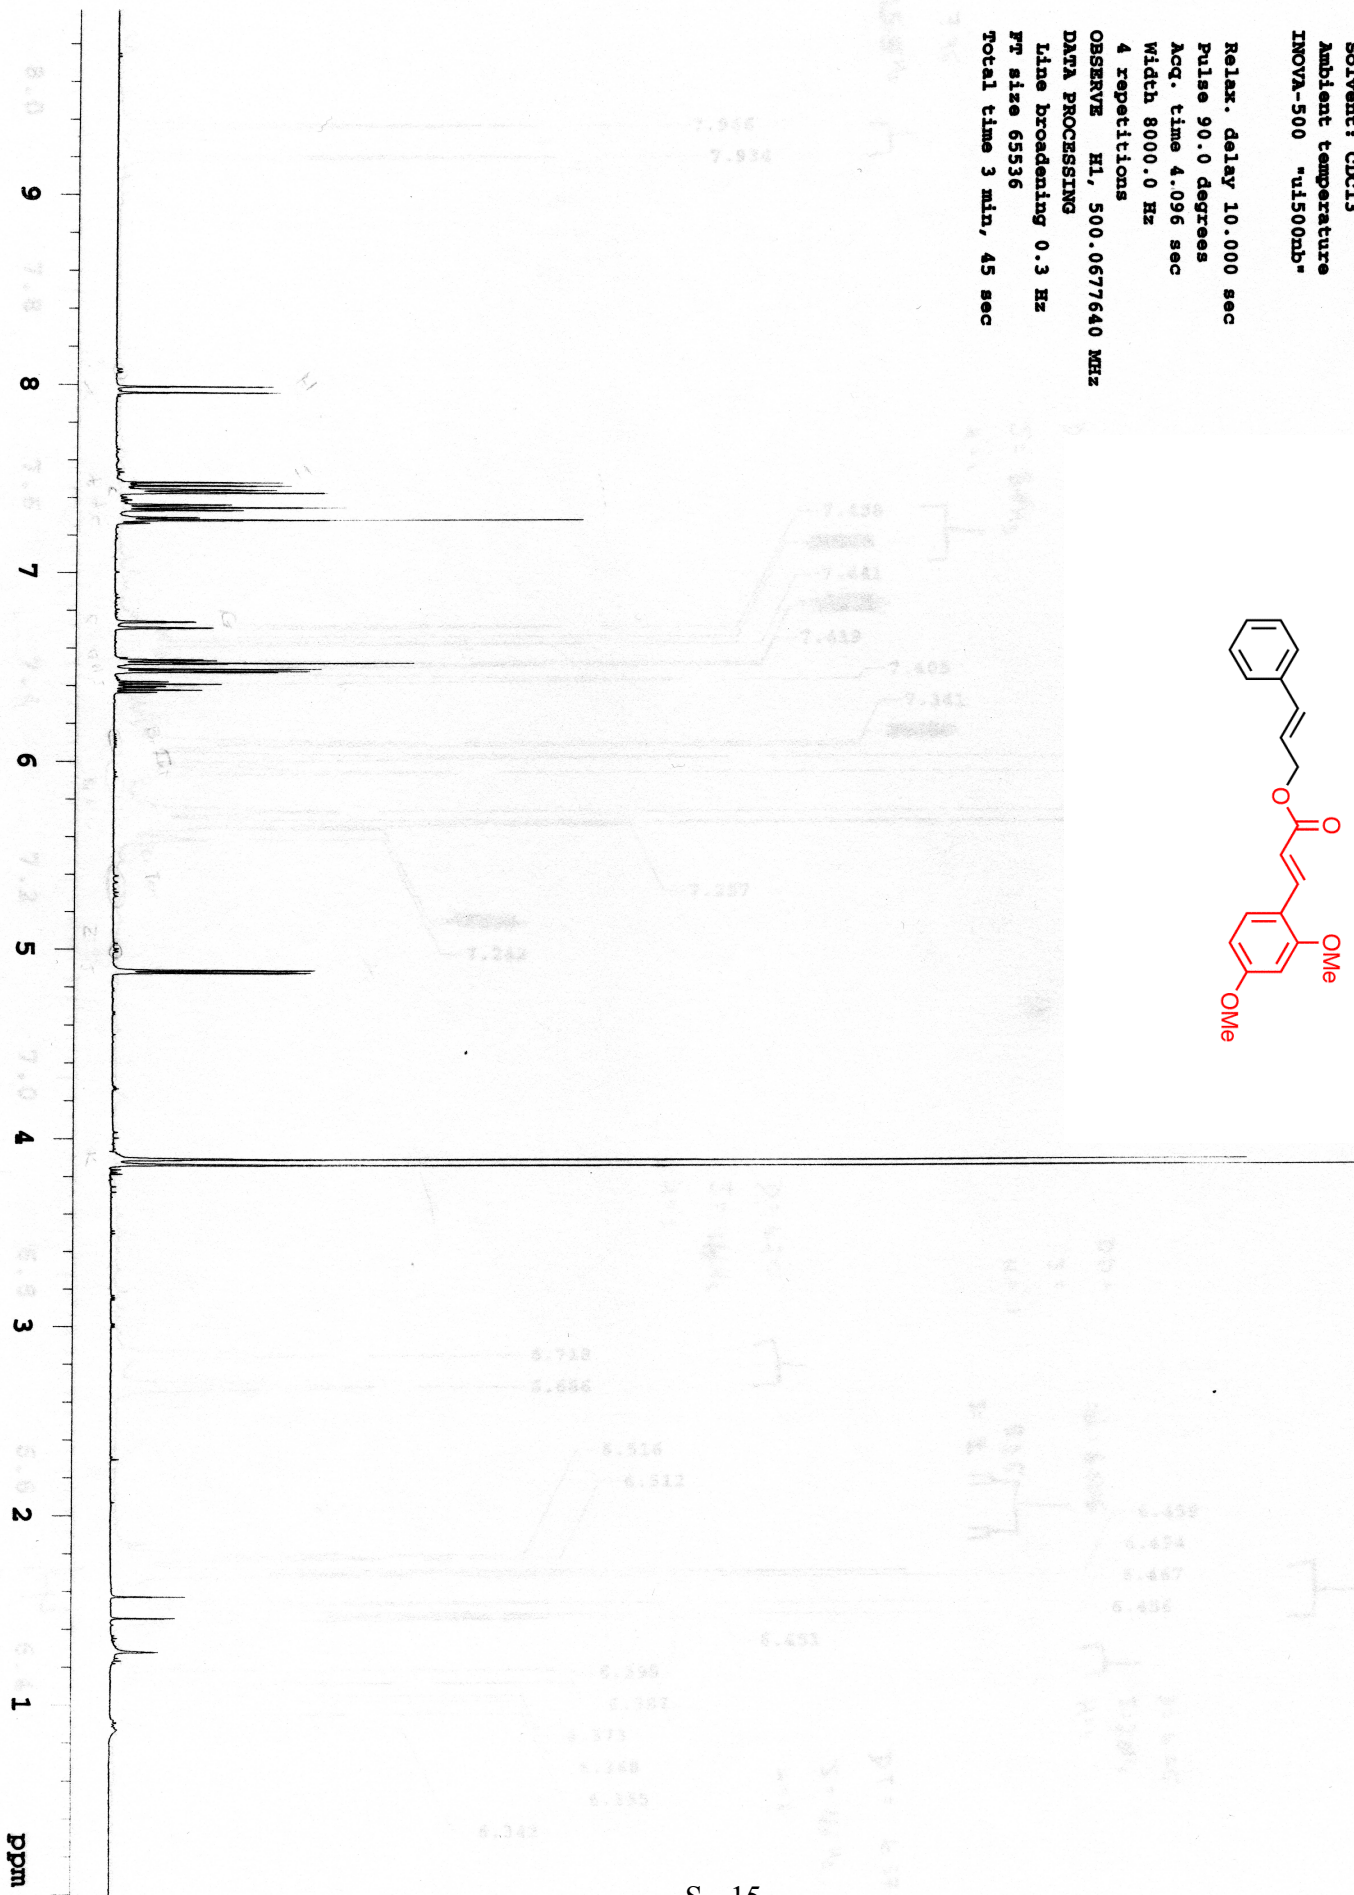

Filename: -

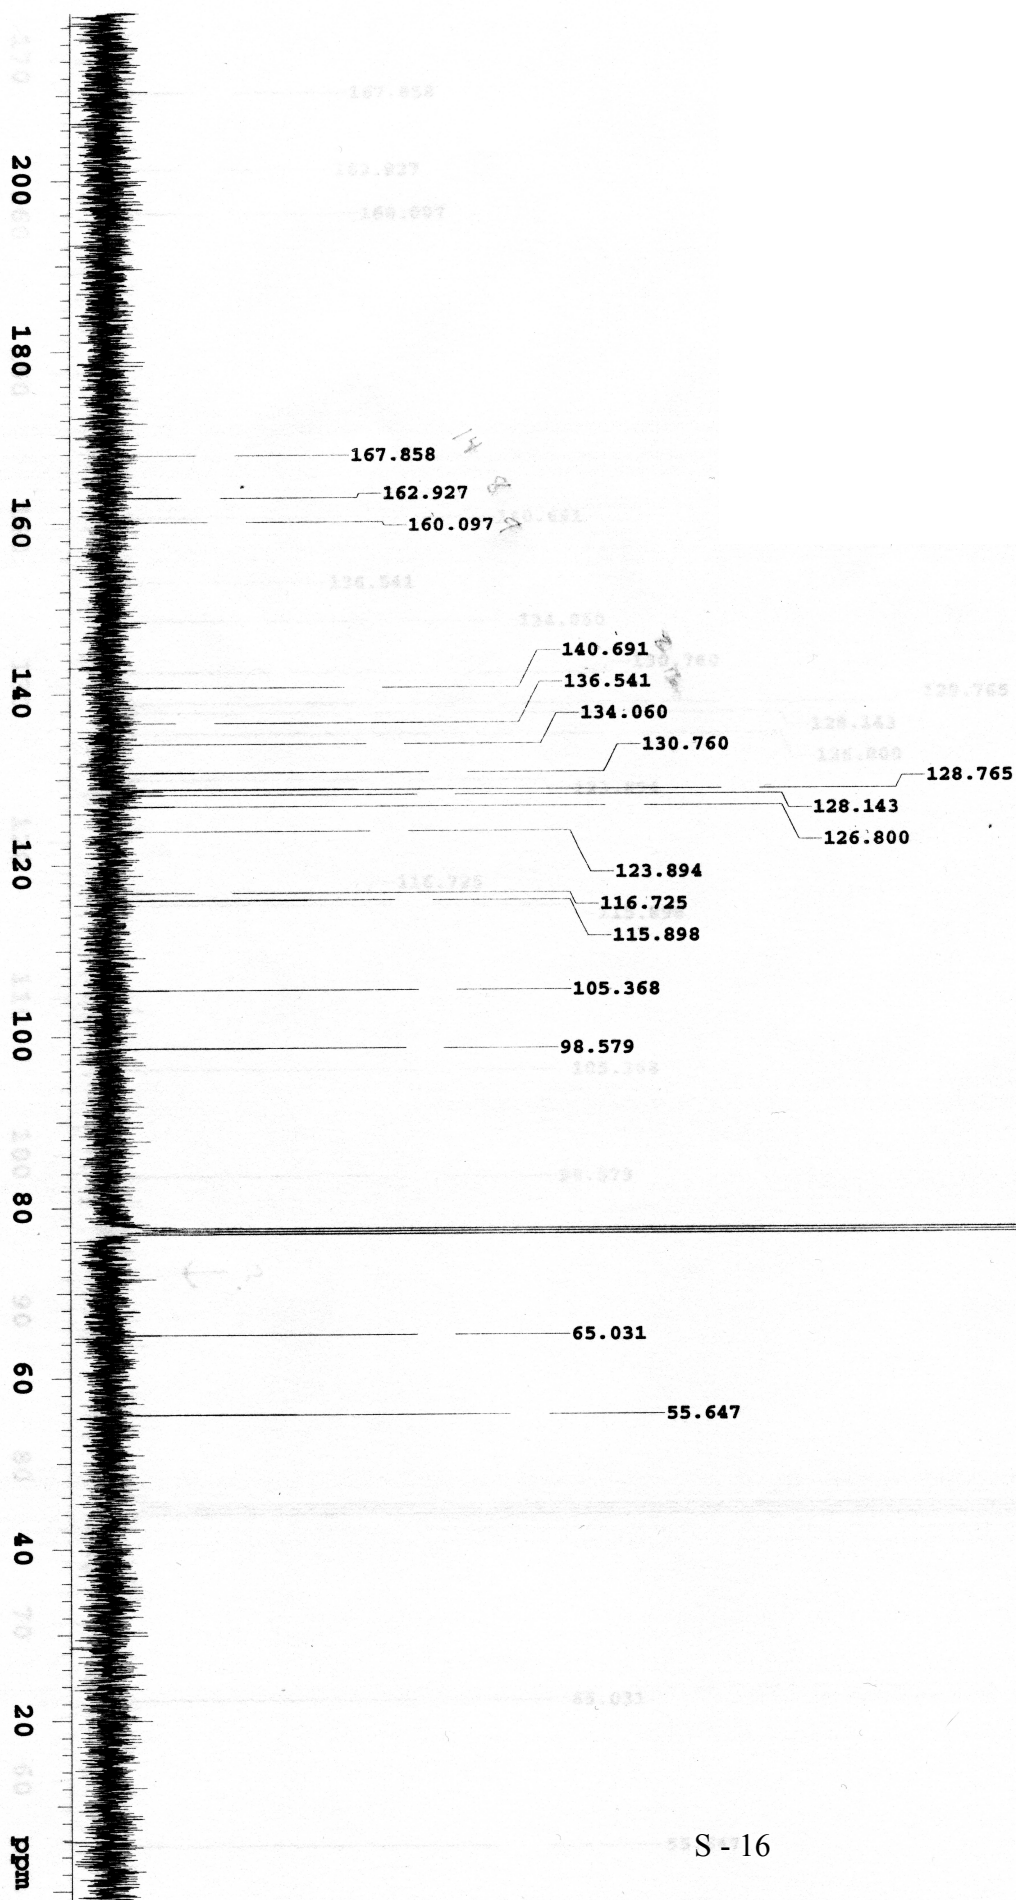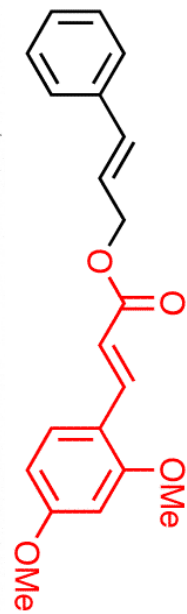

Pulse Sequence: s2pul

Solvent: CDCl3

Ambient temperature

UNITY-400 "4400"

Relax. delay 5.000 sec

Pulse 45.0 degrees

Acq. time 4.096 sec

Width 8000.0 Hz

13 repetitions

OBSERVE H1, 399.9486787 MHz

DATA PROCESSING

Line broadening 0.3 Hz

Fr size 65536

Total time 9 min, 42 sec

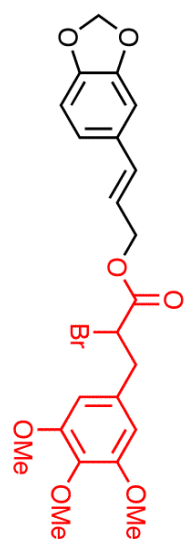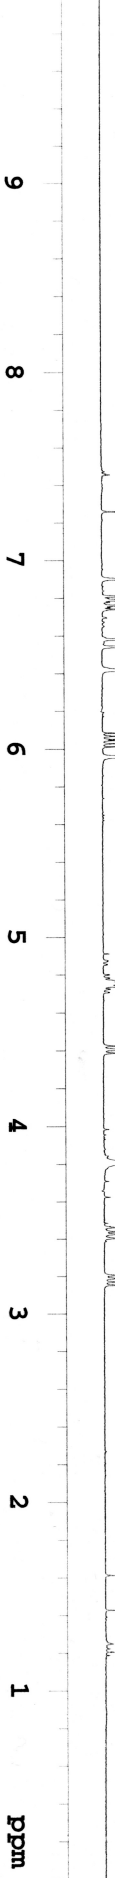



Pulse Sequence: s2pul

Solvent: CDC13  
Ambient temperature  
UNIT4-400 "u400"

Relax. delay 1.000 sec  
Pulse 45.0 degrees  
Acq. time 1.311 sec  
Width 25000.0 Hz

256 repetitions

OBSERVE C13, 100.5671512 MHz

DECOUPLE H1, 399.9500118 MHz

Power 48 dB

continuously on

WALTZ-16 modulated

DATA PROCESSING

line broadening 1.0 Hz

FT size 65536

Total time 19 min, 48 sec

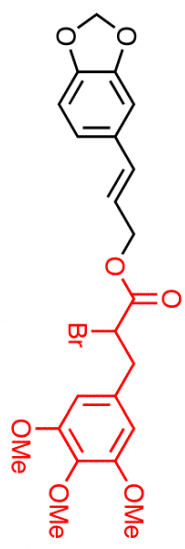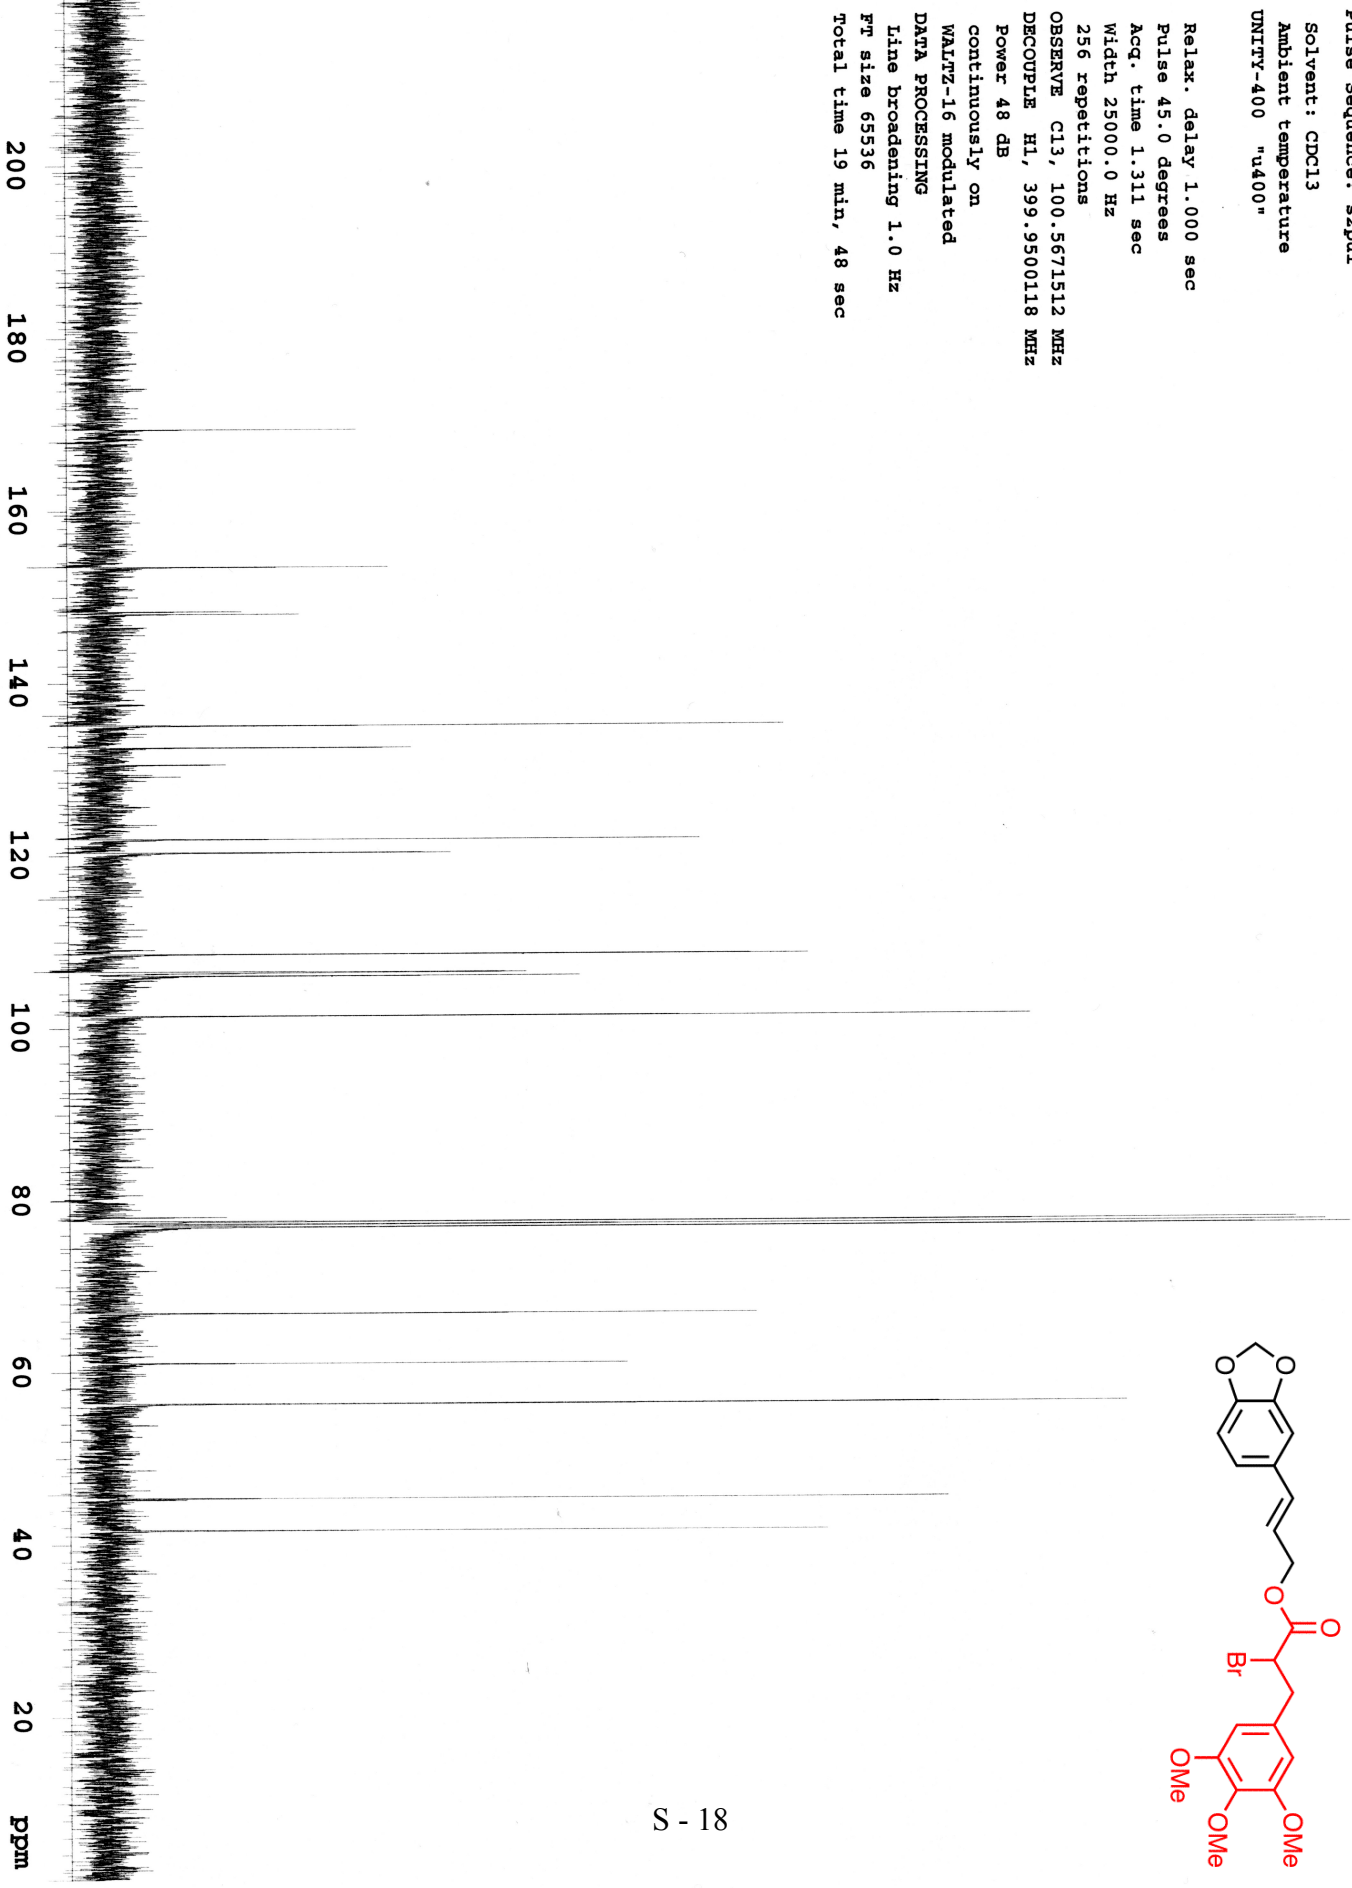

NVX136.colummed

Pulse Sequence: s2pul

Solvent: CDCl3

Ambient temperature

Operator: userld

INOVA-400 "u400"

Relax. delay 10.000 sec

Pulse 49.2 degrees

Acq. time 4.096 sec

Width 8000.0 Hz

5 repetitions

OBSERVE H1, 399.9454252 MHz

DATA PROCESSING

Line broadening 0.3 Hz

FT size 65536

Total time 7 min, 31 sec

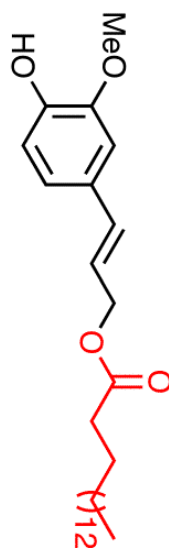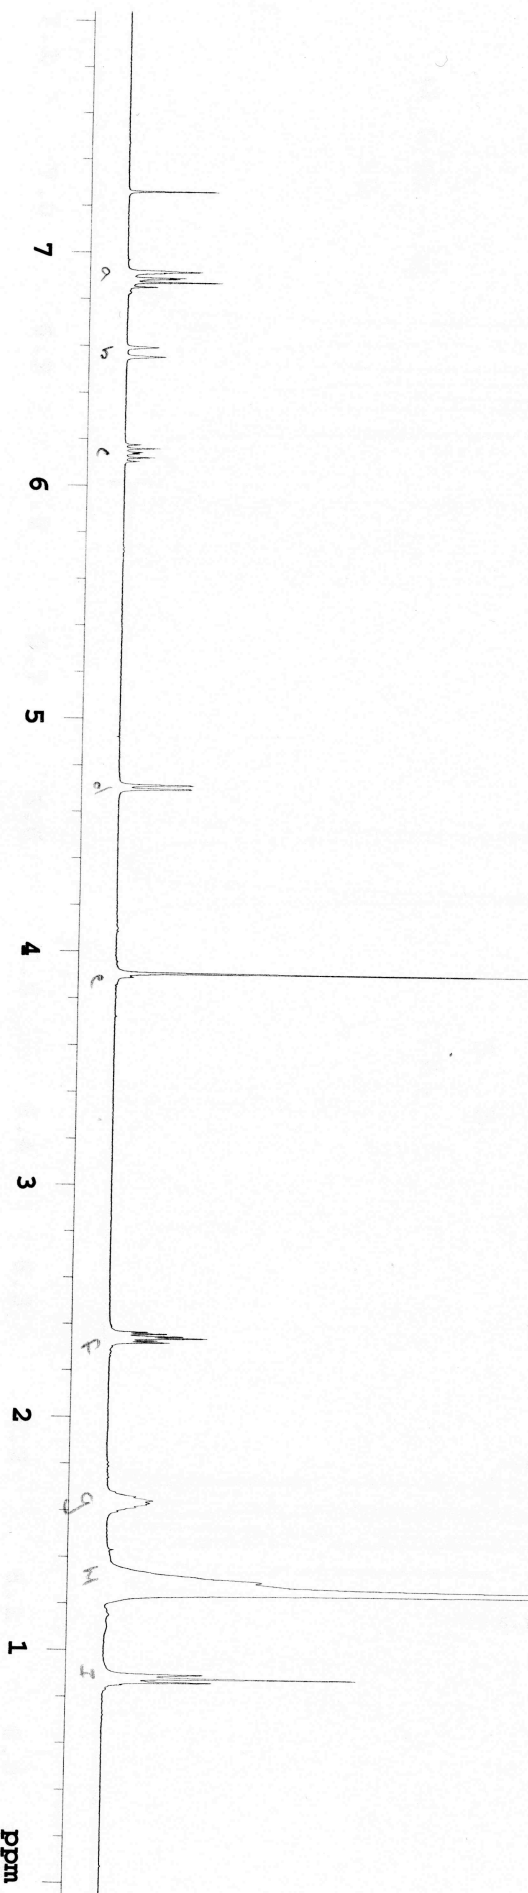

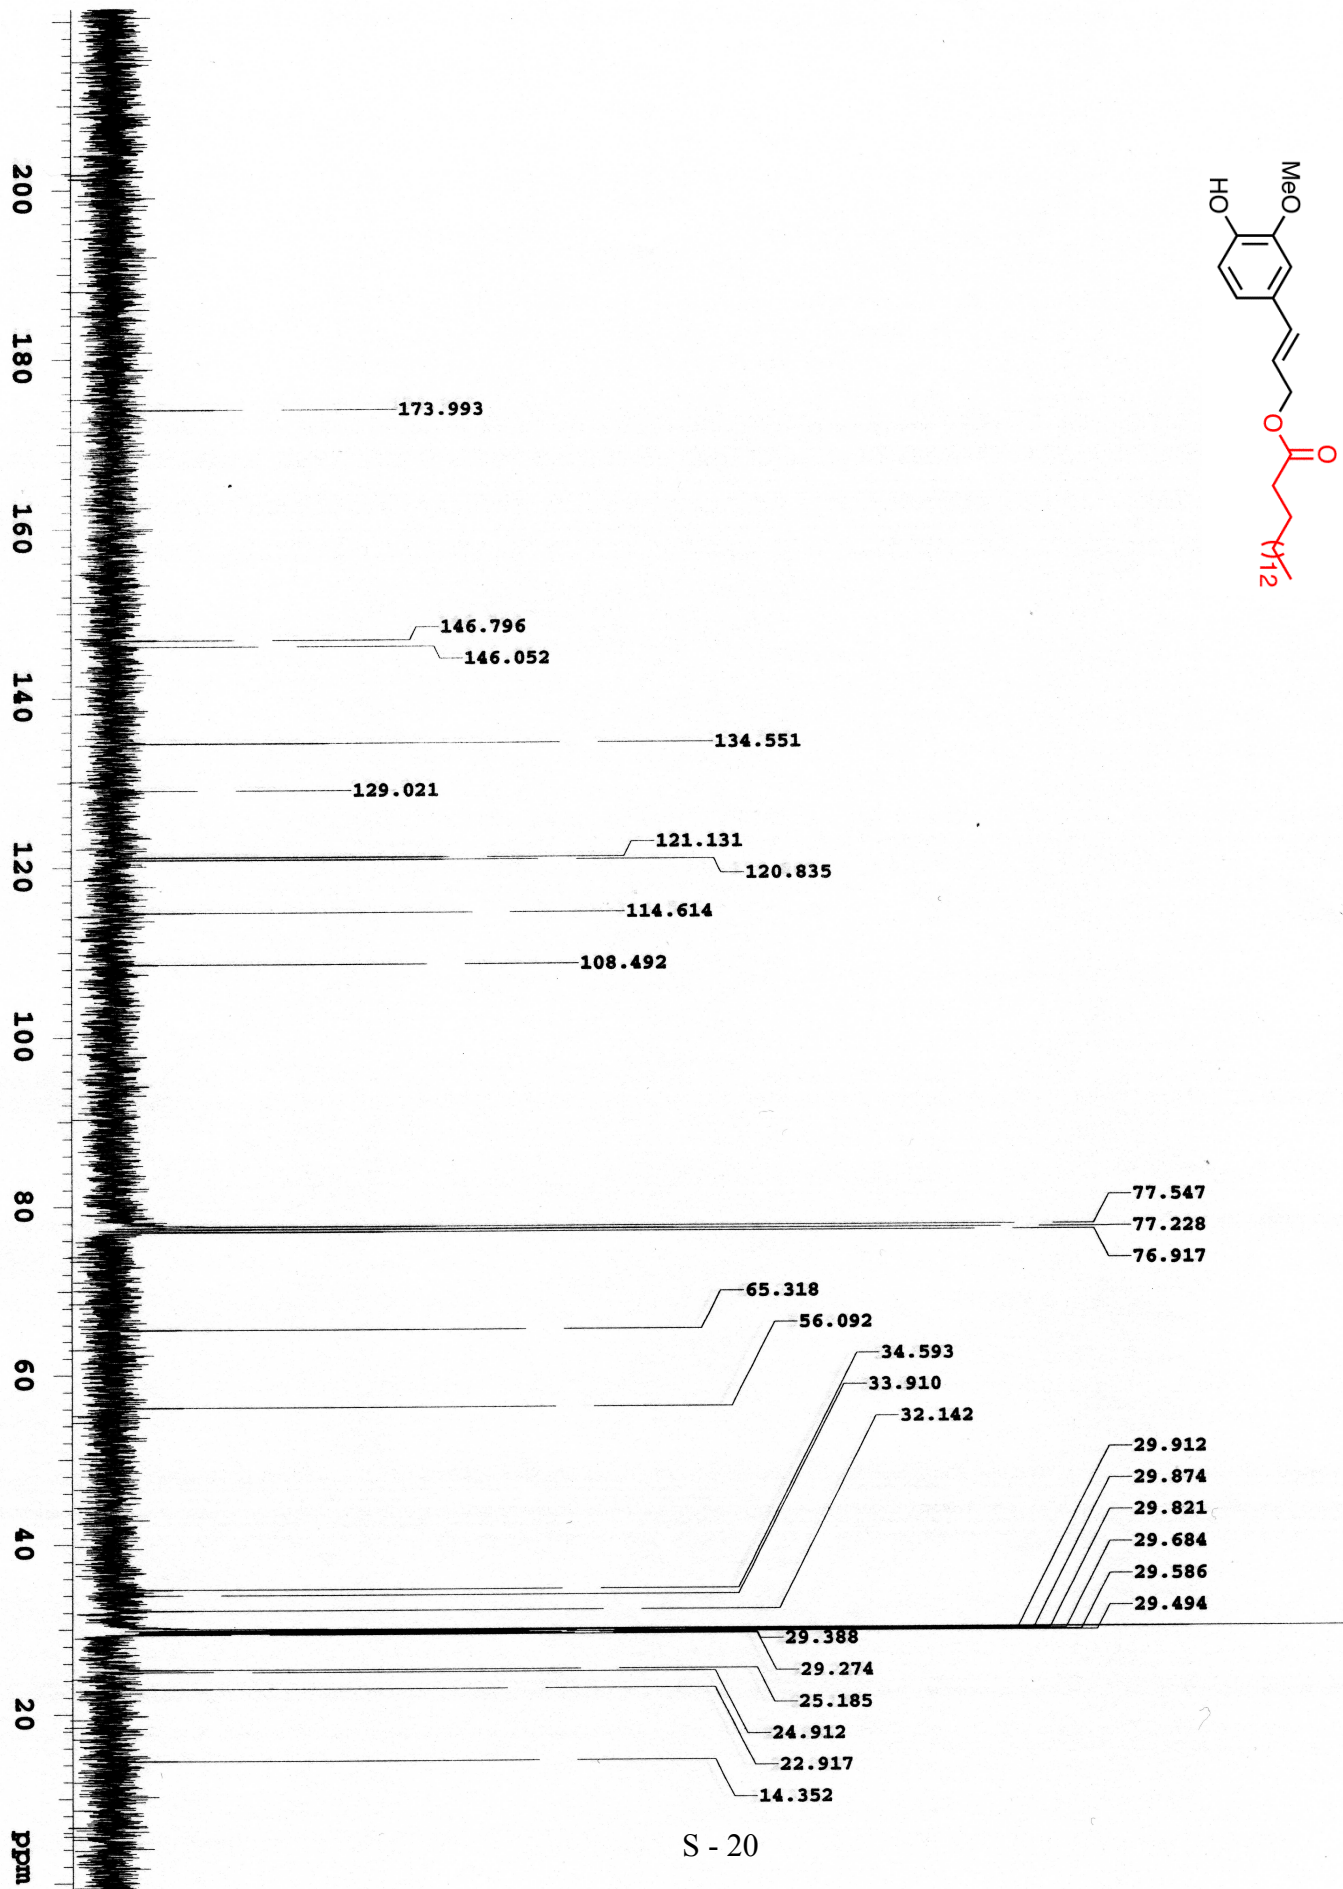

Pulse Sequence: s2pul1

Solvent: CDCl3

Ambient temperature

INOVA-500 "ui500nb"

Relax. delay 10.000 sec

Pulse 90.0 degrees

Acq. time 4.096 sec

Width 8000.0 Hz

4 repetitions

OBSERVE H1, 500.0677728 MHz

DATA PROCESSING

Line Broadening 0.3 Hz

FT size 65536

Total time 1 min, 52 sec

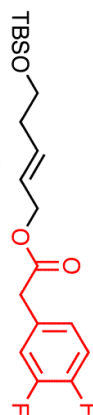

9 8 7 6 5 4 3 2 1 -0 ppm

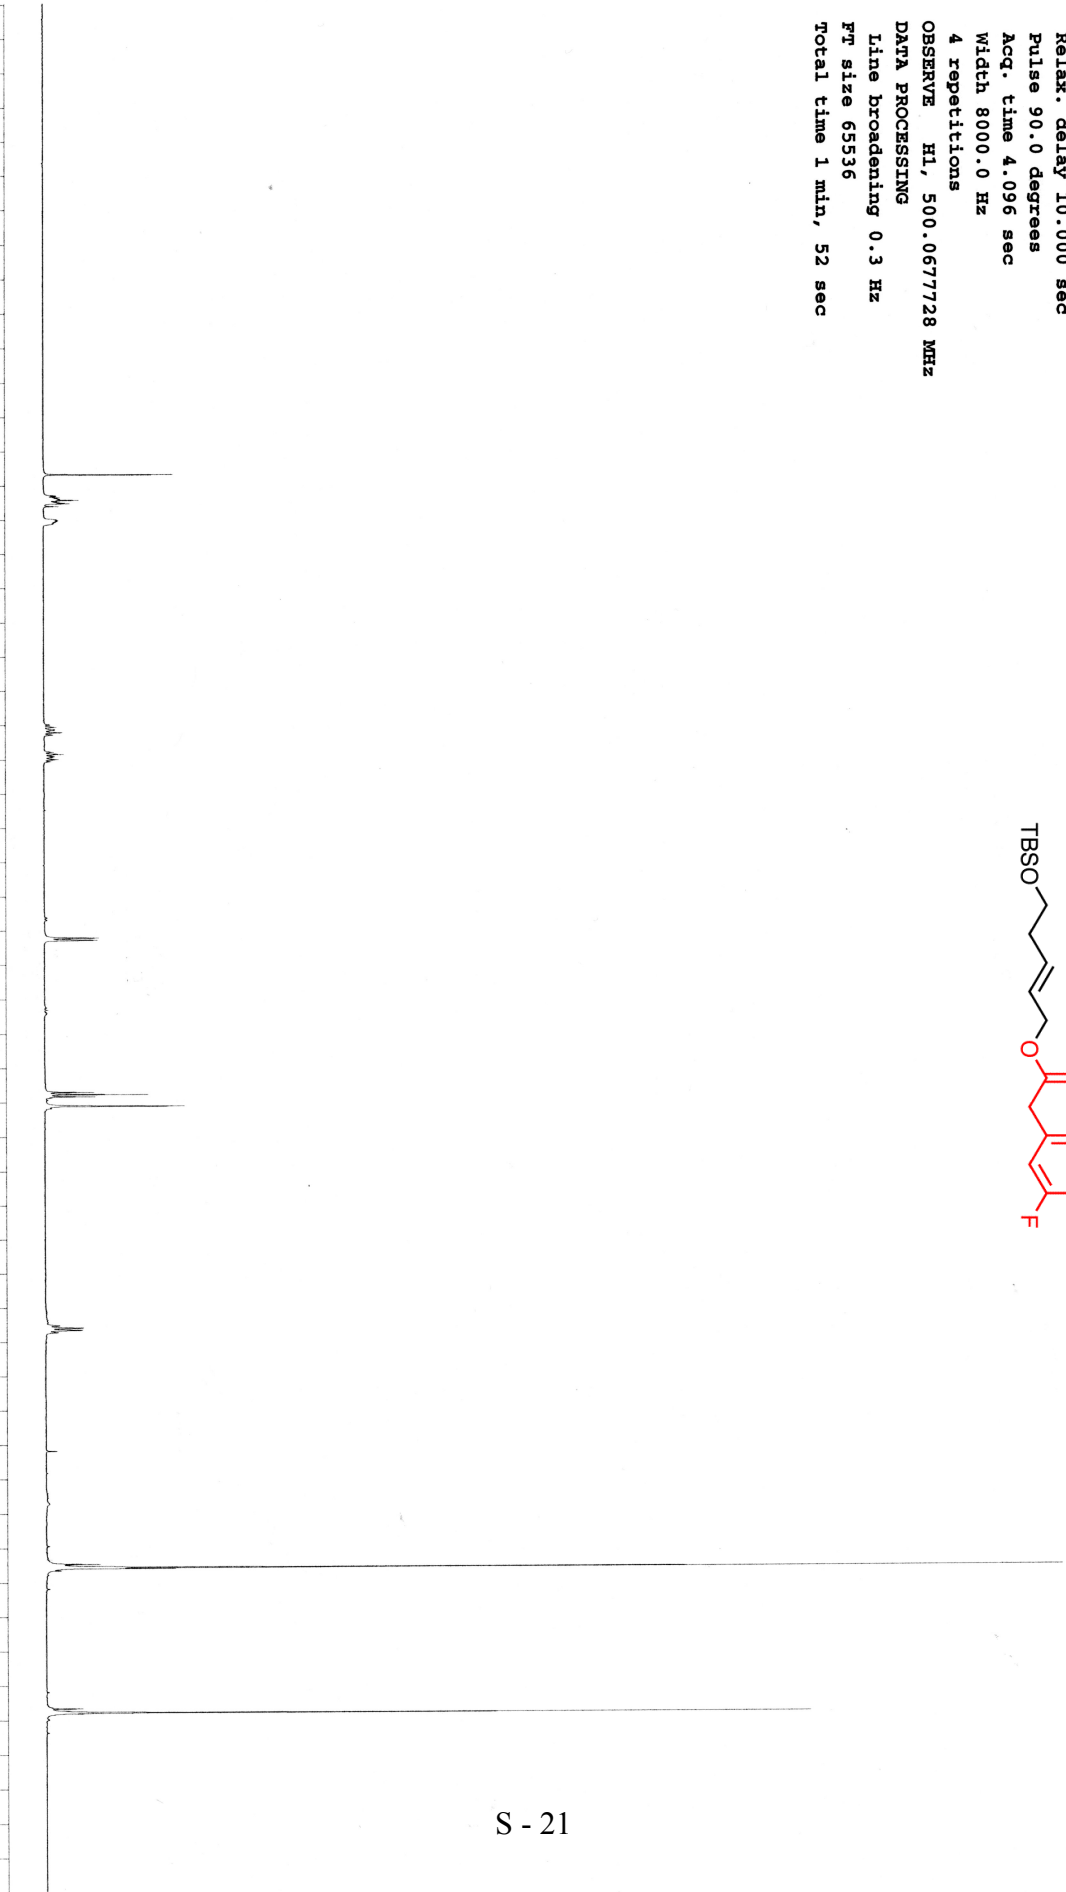



Pulse Sequence: s2pul

Solvent: CDCl3

Ambient temperature

User: 1-14-87

UNITY-500 "u500"

Relax. delay 3.000 sec

Pulse 63.5 degrees

Acq. time 1.086 sec

Width 30165.9 Hz

448 repetitions

OBSERVE C13, 125.6487514 MHz

DECOUPLE H1, 499.6981123 MHz

Power 40 dB

continuously on

WALTZ-16 modulated

DATA PROCESSING

Line broadening 1.0 Hz

FT size 65536

Total time 35 min, 1 sec

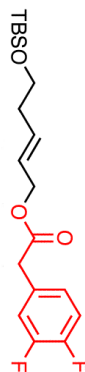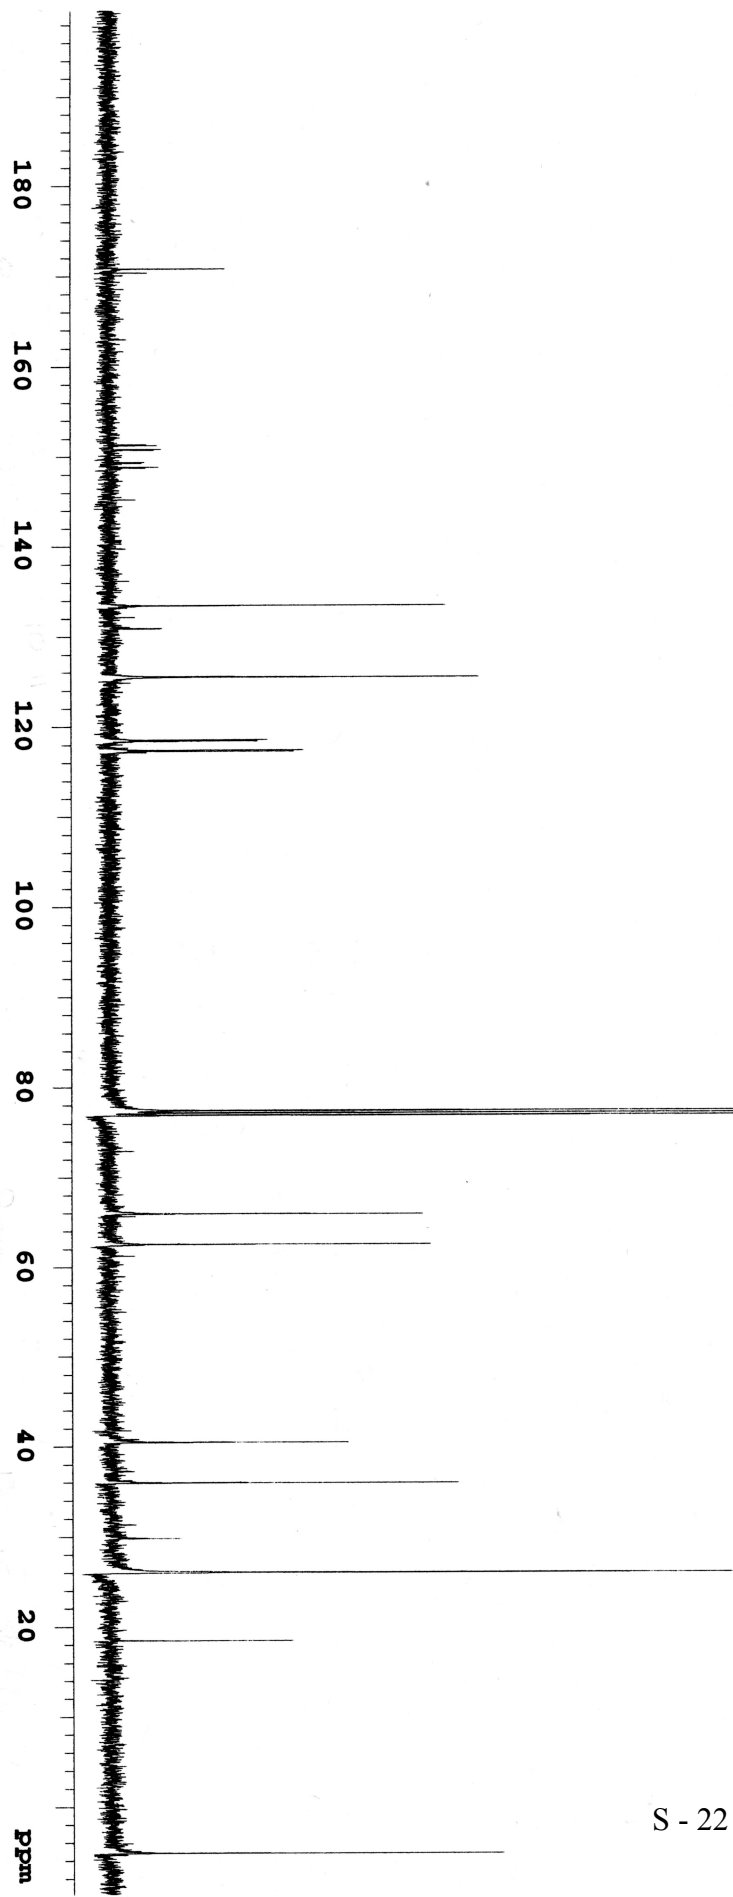

Pulse Sequence: s2pul  
Solvent: CDCl3  
Ambient temperature  
INOVA-500 "ui500nb"

Relax. delay 5.000 sec  
Pulse 90.0 degrees  
Acq. time 4.096 sec  
Width 8000.0 Hz  
7 repetitions  
OBSERVE H1, 500.0677750 MHz  
DATA PROCESSING  
Line broadening 0.3 Hz  
FT size 65536  
Total time 2 min, 25 sec

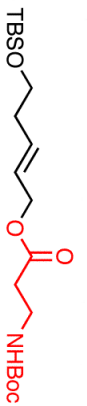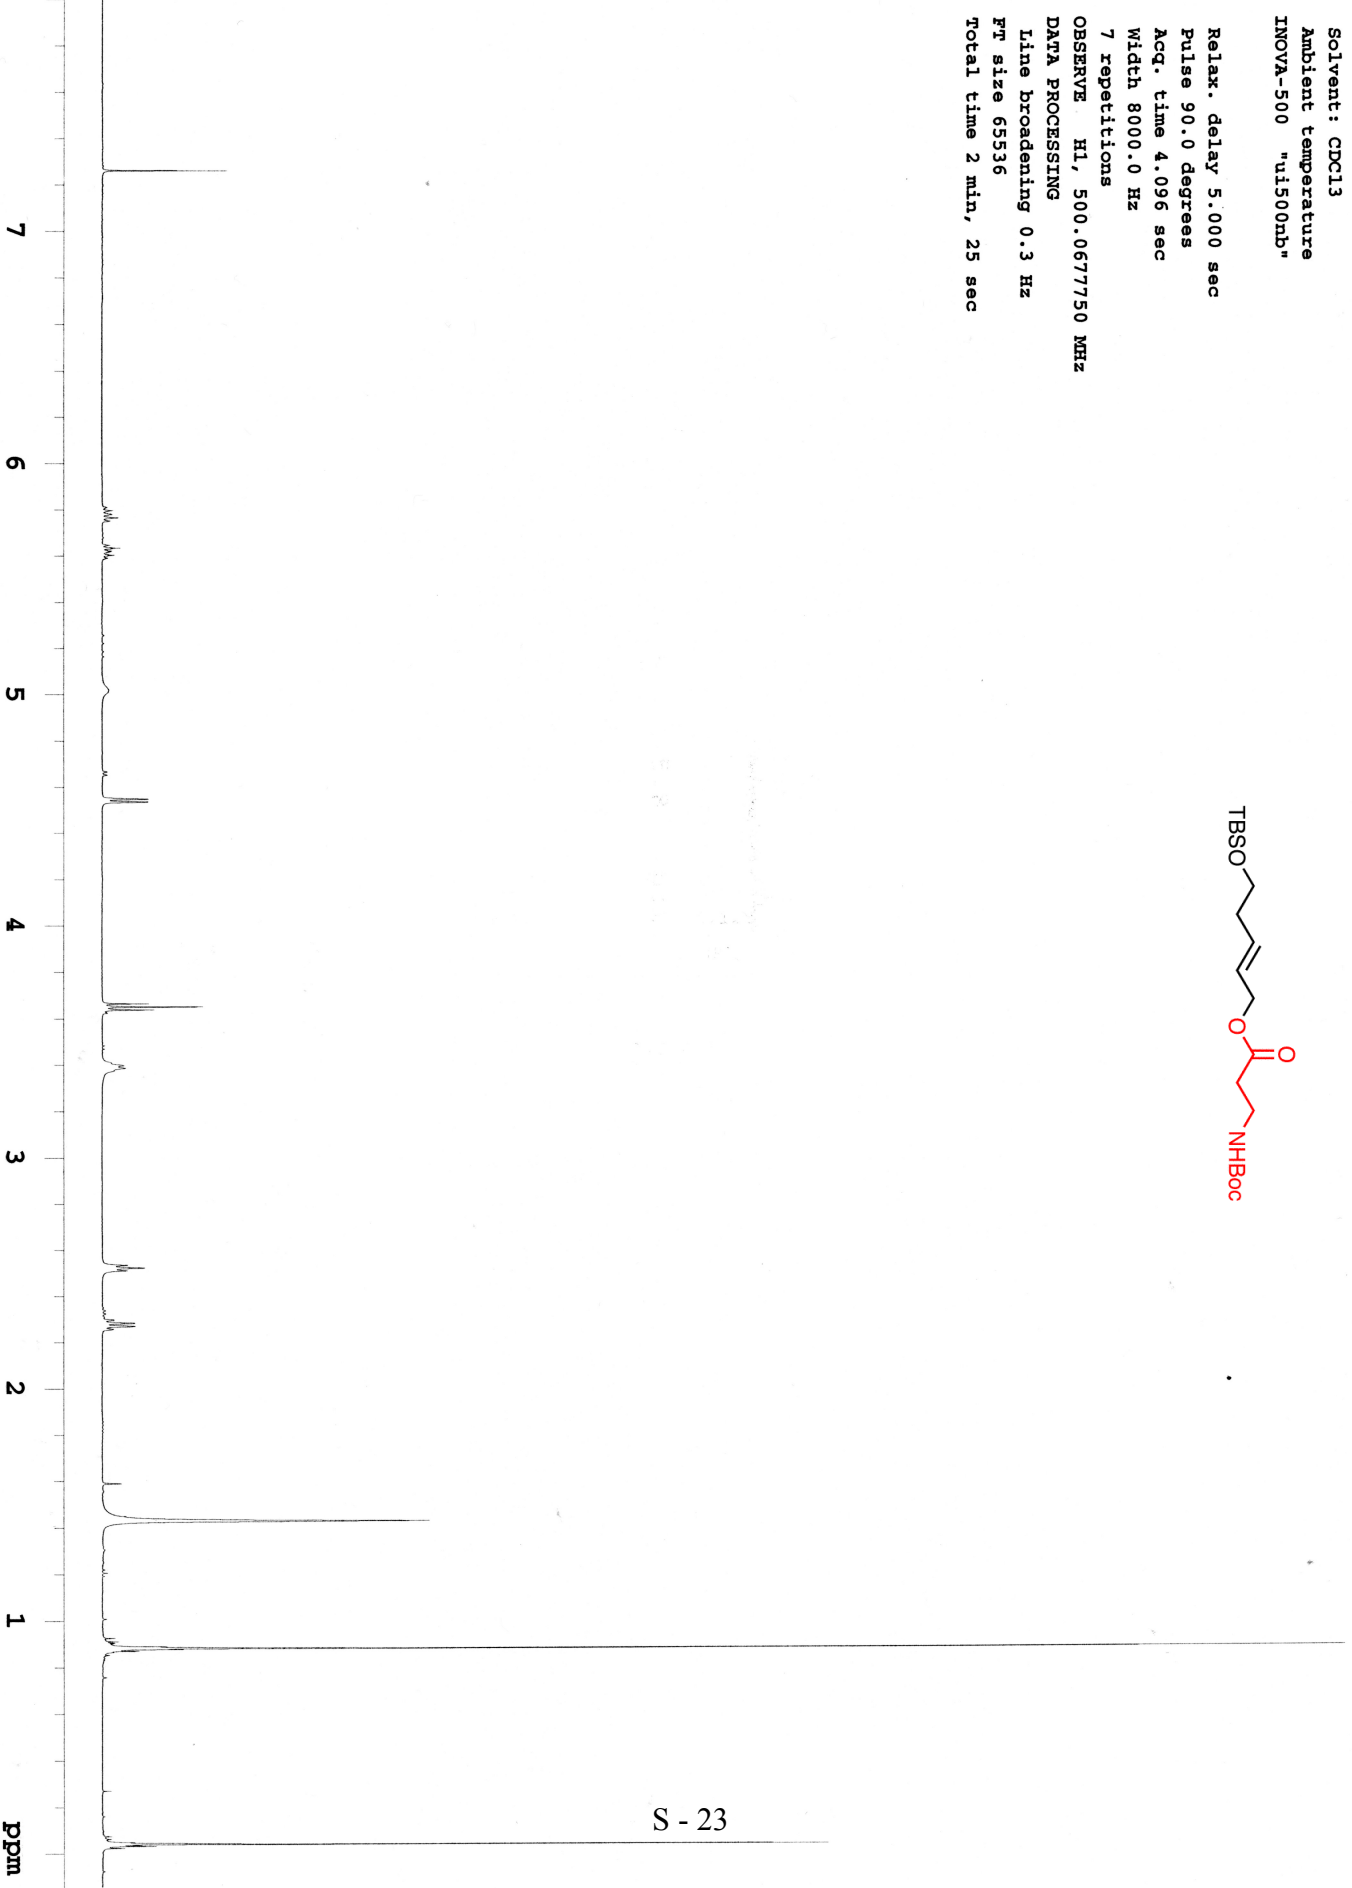

13C OBSERVE

Filename: -

Pulse Sequence: s2pul

Solvent: CDCl3  
Ambient temperature  
UNITRY-400 "1400"

Relax. delay 4.000 sec

Pulse 60.0 degrees

Acq. time 1.311 sec

Width 25000.0 Hz

656 repetitions

OBSERVE C13, 100.5671512 MHz

DECOUPLE H1, 399.9500118 MHz

Power 48 dB

continuously on

WALTZ-16 modulated

DATA PROCESSING

Line broadening 1.0 Hz

PT size 65536

Total time 14 hr, 46 min, 55 sec

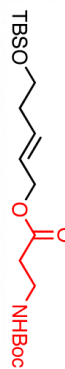

S - 24

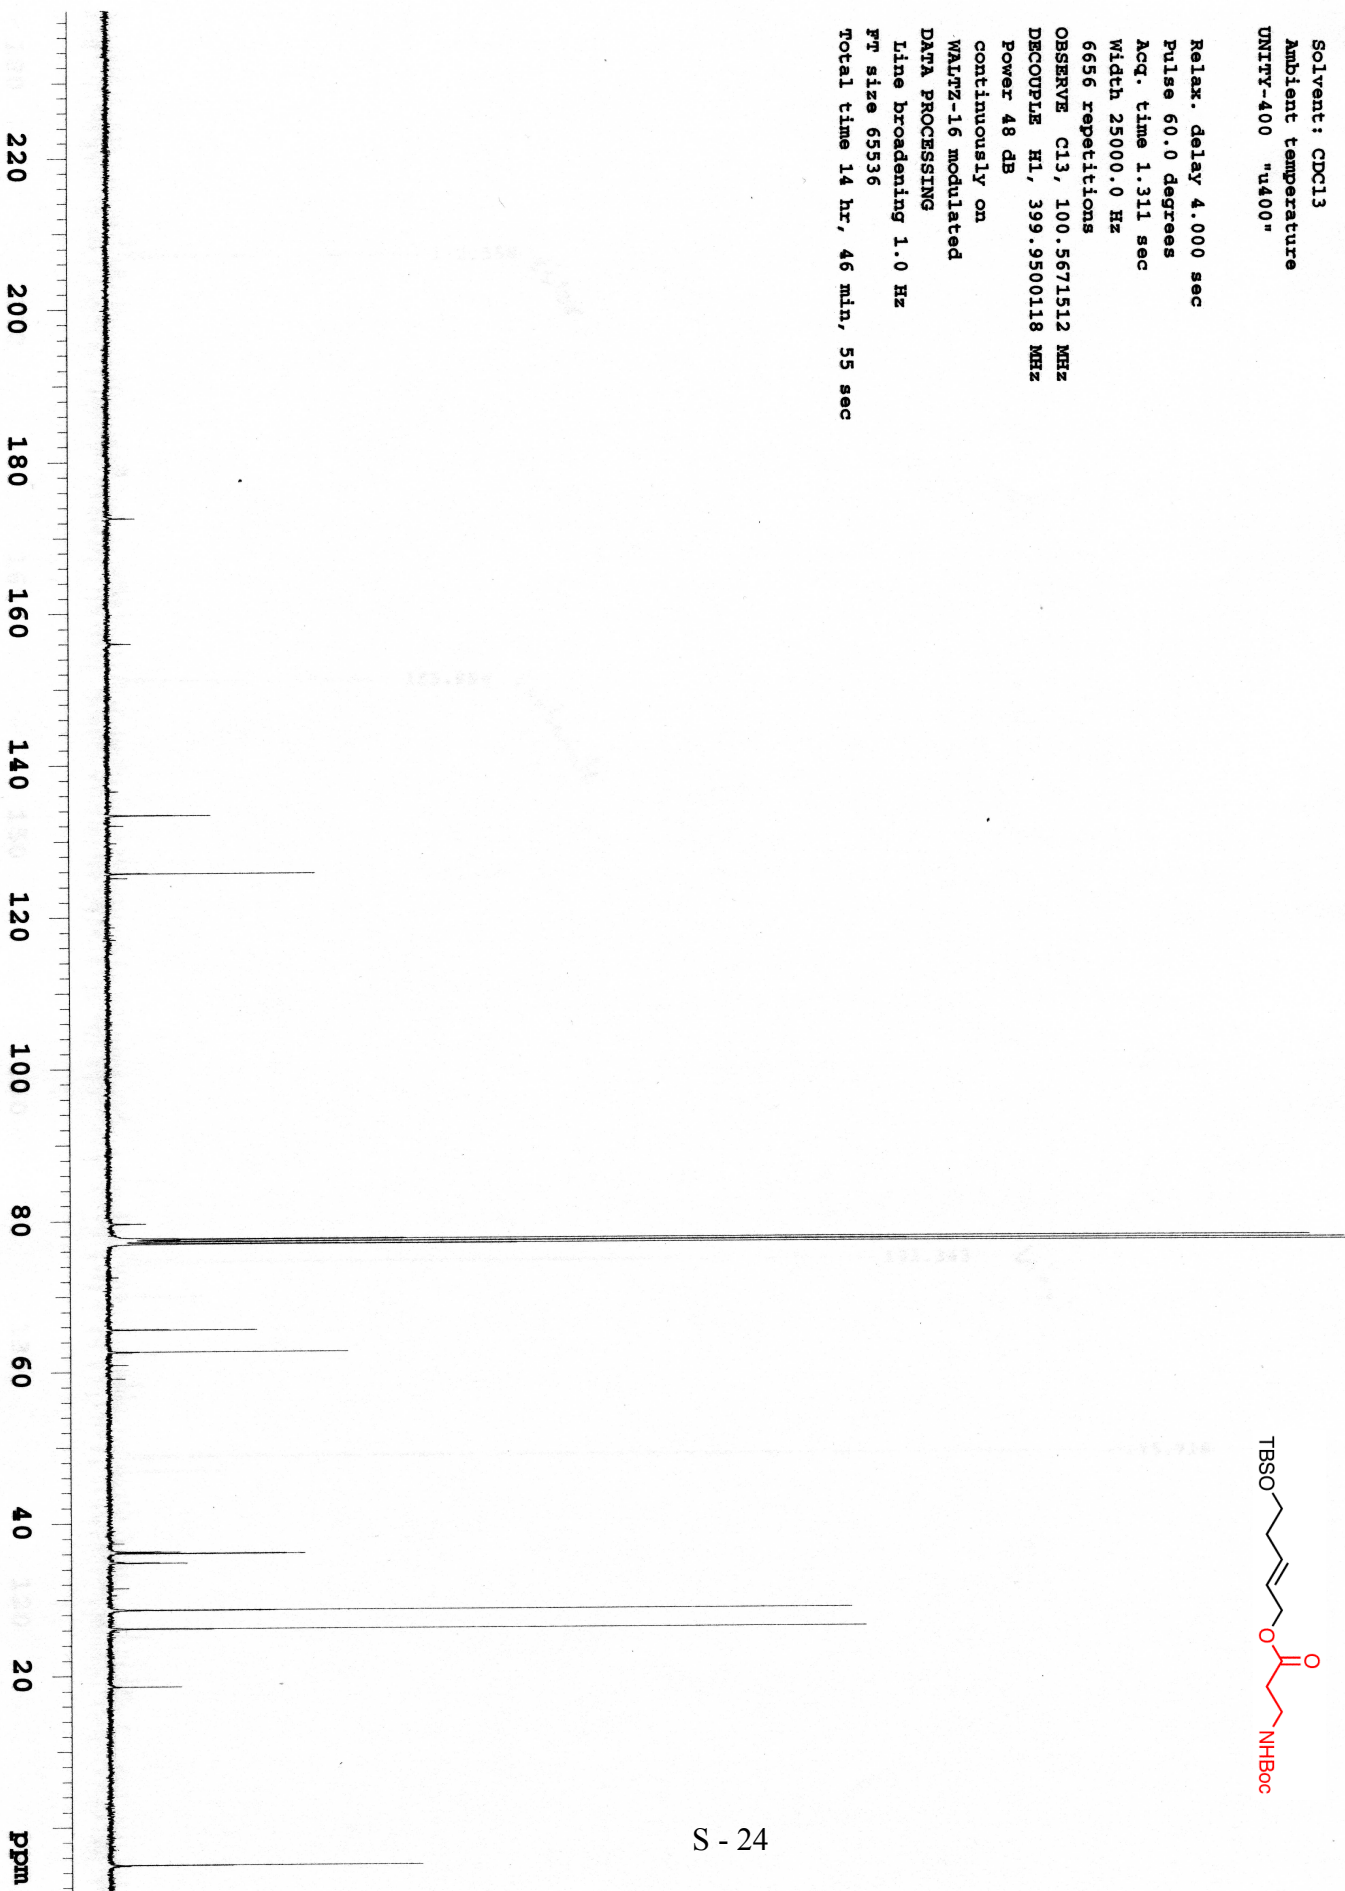

Pulse Sequence: s2pul

Solvent: CDCl3

Ambient temperature

UNITTY-400 "u400"

Relax. delay 5.000 sec

Pulse 45.0 degrees

Acq. time 4.096 sec

Width 8000.0 Hz

3 repetitions

OBSERVE H1, 399.9486787 MHz

DATA PROCESSING

Line broadening 0.3 Hz

FW size 65536

Total time 2 min, 25 sec

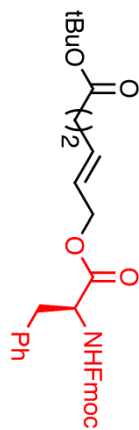

9 8 7 6 5 4 3 2 1 ppm





date Feb 28 2008 dn H1  
 solvent CDC13 dof 0  
 file /export/home/~ dm nm  
 data/u400/White/ve- dmm c  
 rmeulen/NVTI.Subs- dmf 200  
 trale.B.Version2.f~ dpwr 20

ACQUISITION id lb PROCESSING  
 sfreq 399.951 wfFile 0.30

tn H1 proc ft  
 at 4.096 fn not used  
 np 65536 math f

sw 8000.0 weir  
 fb 4400 wepp  
 bs 1 wepp  
 tpr 63 wbs

pw 7.8 wnt  
 dl 10.000 DISPLAY  
 tof -425.7 sp -13.8

nt 32 wp 4027.8  
 ct 32 vs 151  
 alock n sc 0

gain not used wc 250  
 FLAGS hzmm 16.11  
 il n is 390.94  
 in n rfl 4903.2  
 dp y rfp 2903.6  
 hs nm th 24  
 ins 1.000  
 nm ph

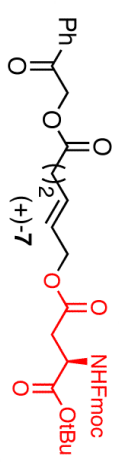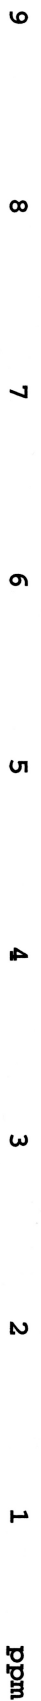

13C OBSERVE

Filename: -

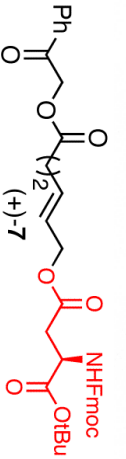

Pulse Sequence: s2pul1

Solvent: CDCl3

Ambient temperature

UNITY-400 "u400"

Relax. delay 2.000 sec

Pulse 60.1 degrees

Acq. time 1.311 sec

Width 25000.0 Hz

944 repetitions

OBSERVE C13, 100.5671512 MHz

DECOUPLE H1, 399.9500118 MHz

Power 48 dB

continuously on

WALTZ-16 modulated

DATA PROCESSING

Line broadening 1.0 Hz

FT size 65536

Total time 9 hr, 13 min, 35 sec

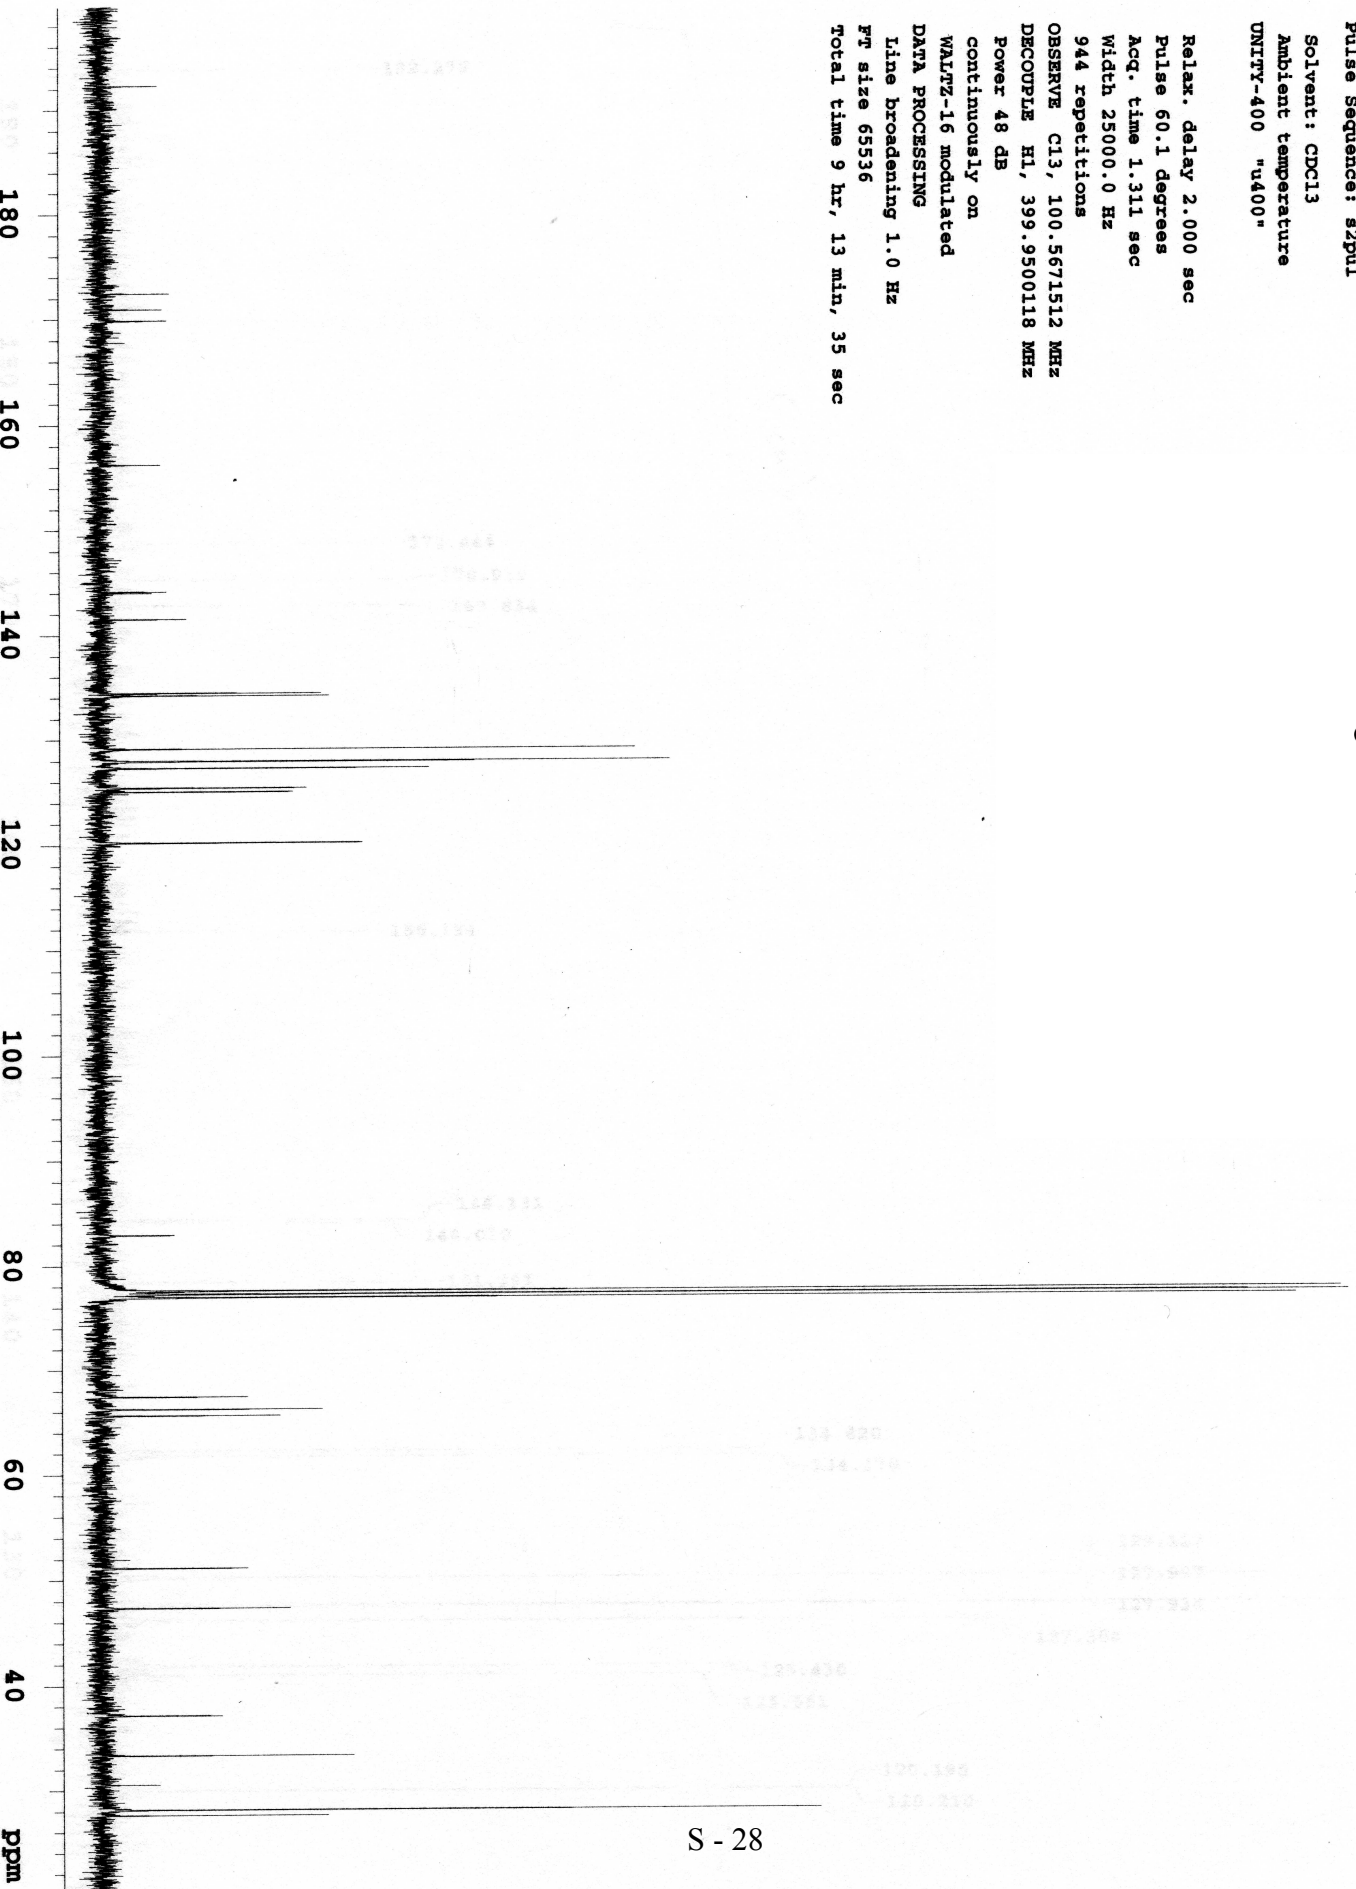

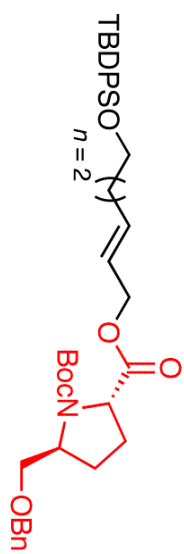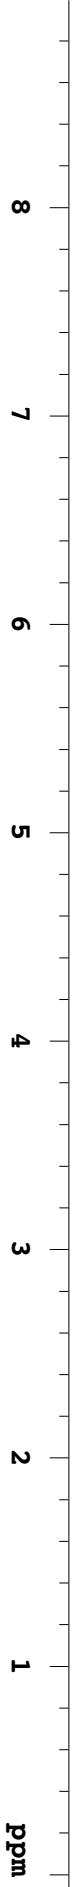



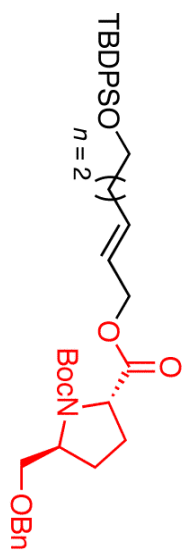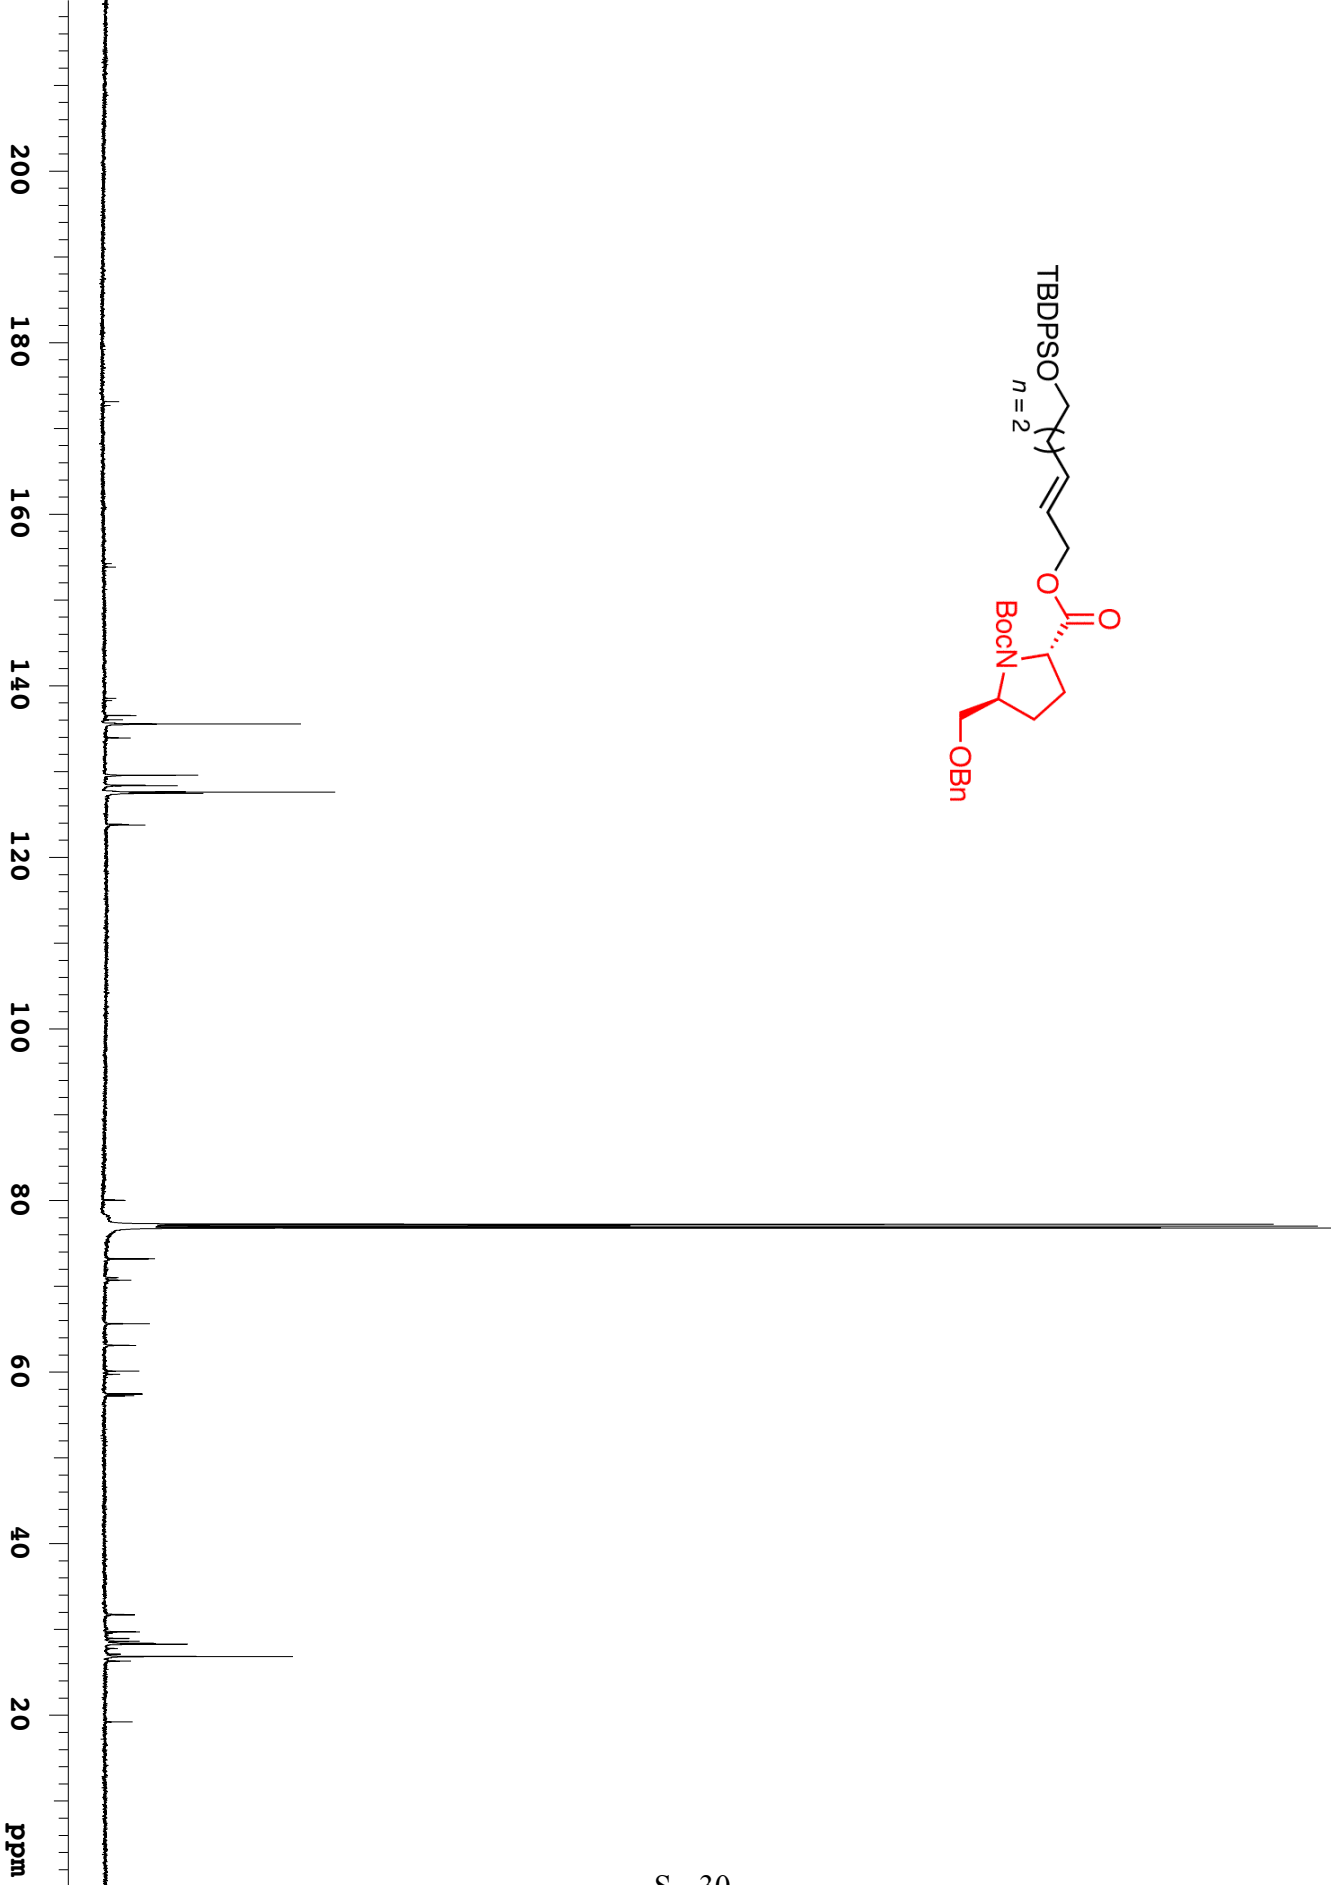

Pulse Sequence: s2pul1

Solvent: D2O

Ambient temperature

UNITTY-400 "u400"

Relax. delay 10.000 sec

Pulse 45.0 degrees

Acq. time 4.096 sec

Width 8000.0 Hz

24 repetitions

OBSERVE H1, 399.9486780 MHz

DATA PROCESSING

Line broadening 0.3 Hz

FW size 65536

Total time 15 min, 2 sec

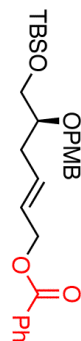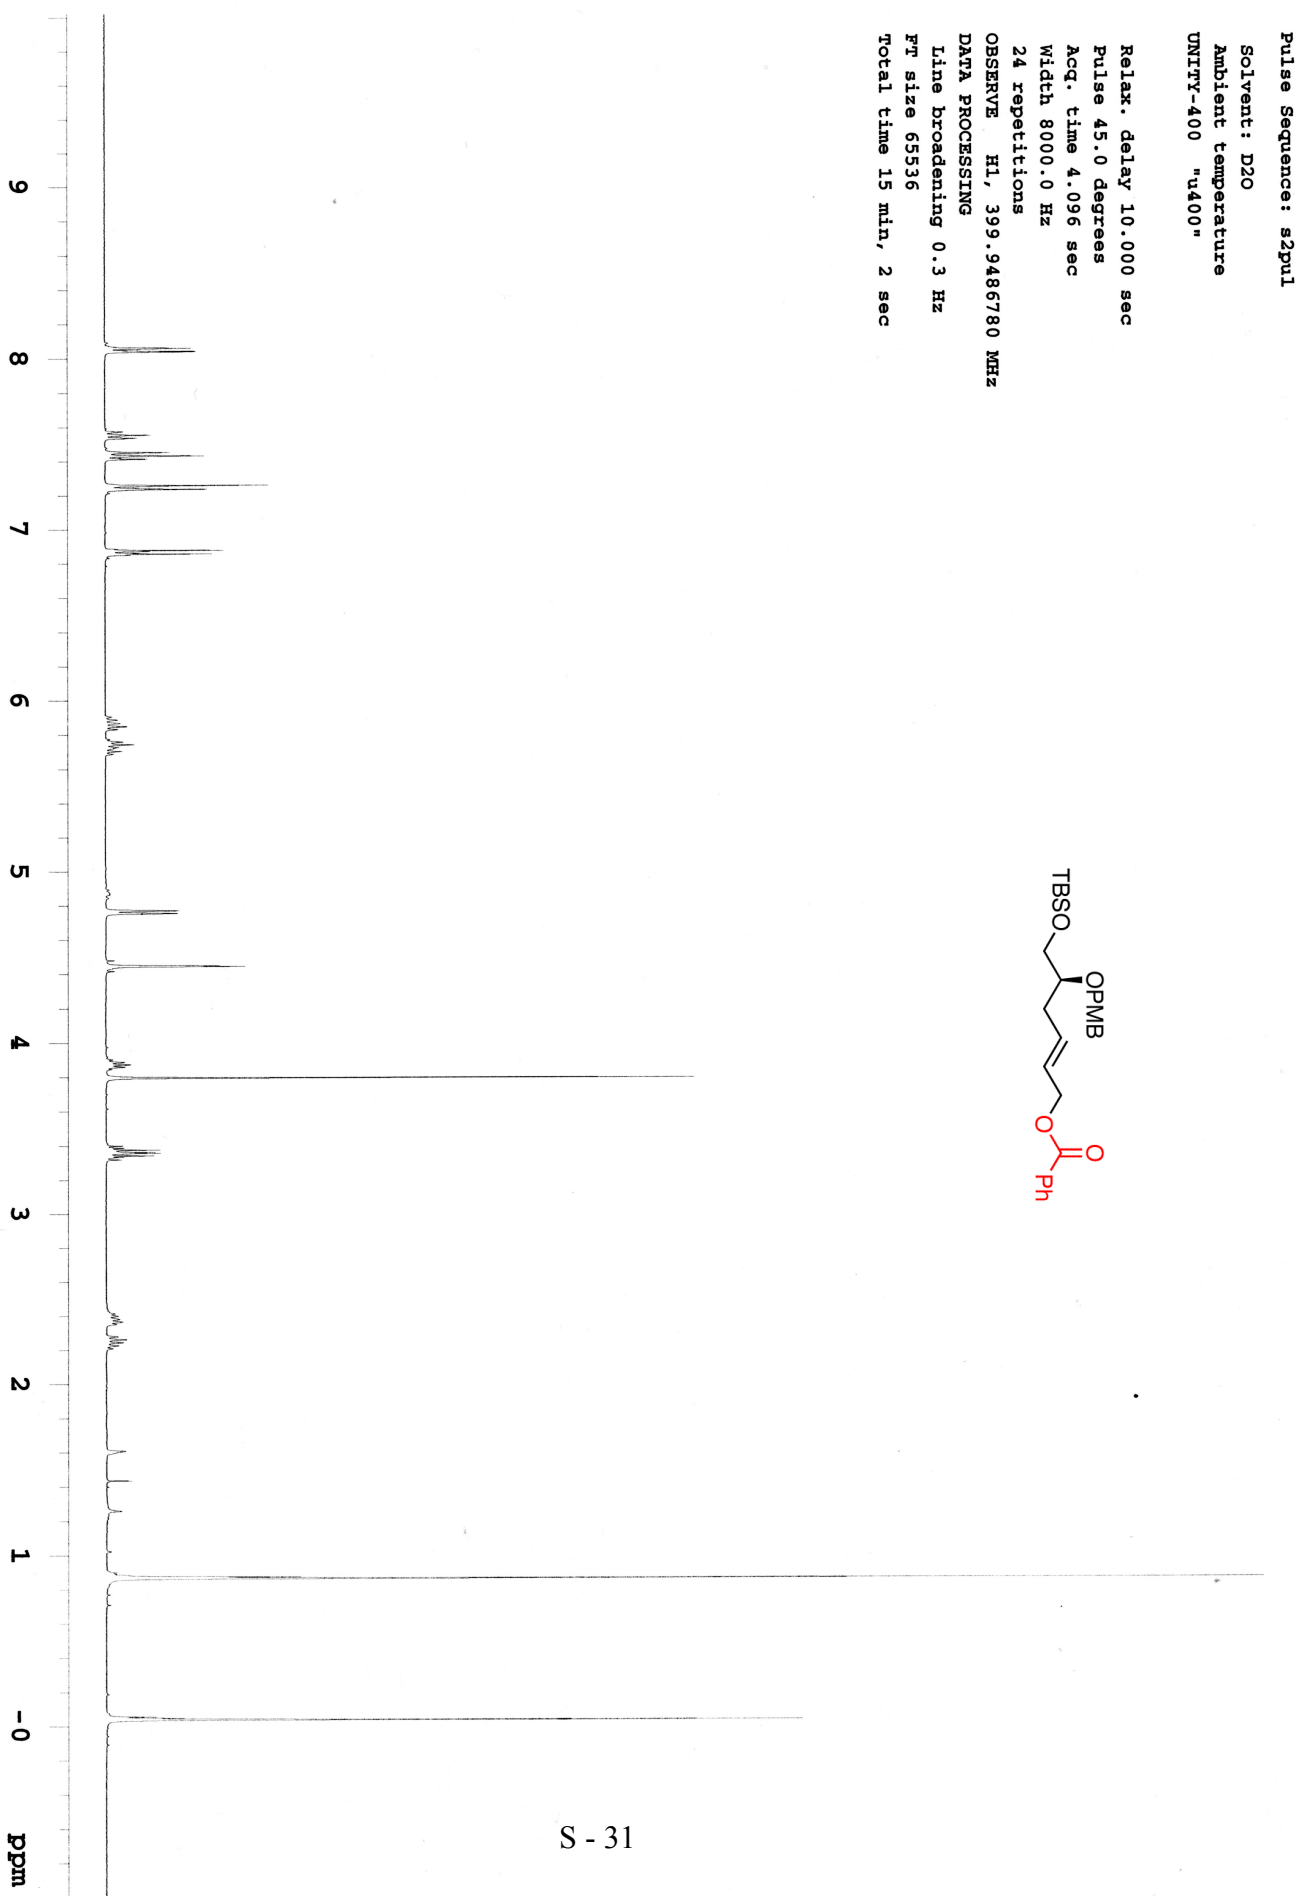

Pulse Sequence: s2pul

Solvent: CDCl3  
Ambient temperature  
UNITRY-400 "u400"

Relax. delay 3.000 sec

Pulse 45.0 degrees

Acq. time 1.311 sec

Width 25000.0 Hz

192 repetitions

OBSERVE C13, 100.5671512 MHz

DECOUPLE H1, 399.9500118 MHz

Power 48 dB

continuously on

WALTZ-16 modulated

DATA PROCESSING

Line broadening 1.0 Hz

FT size 65536

Total time 1 hr, 13 min, 45 sec

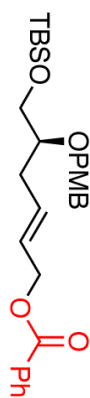

220 200 180 160 140 120 100 80 60 40 20 ppm

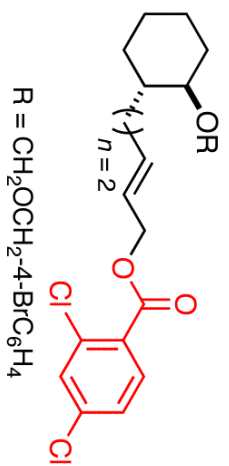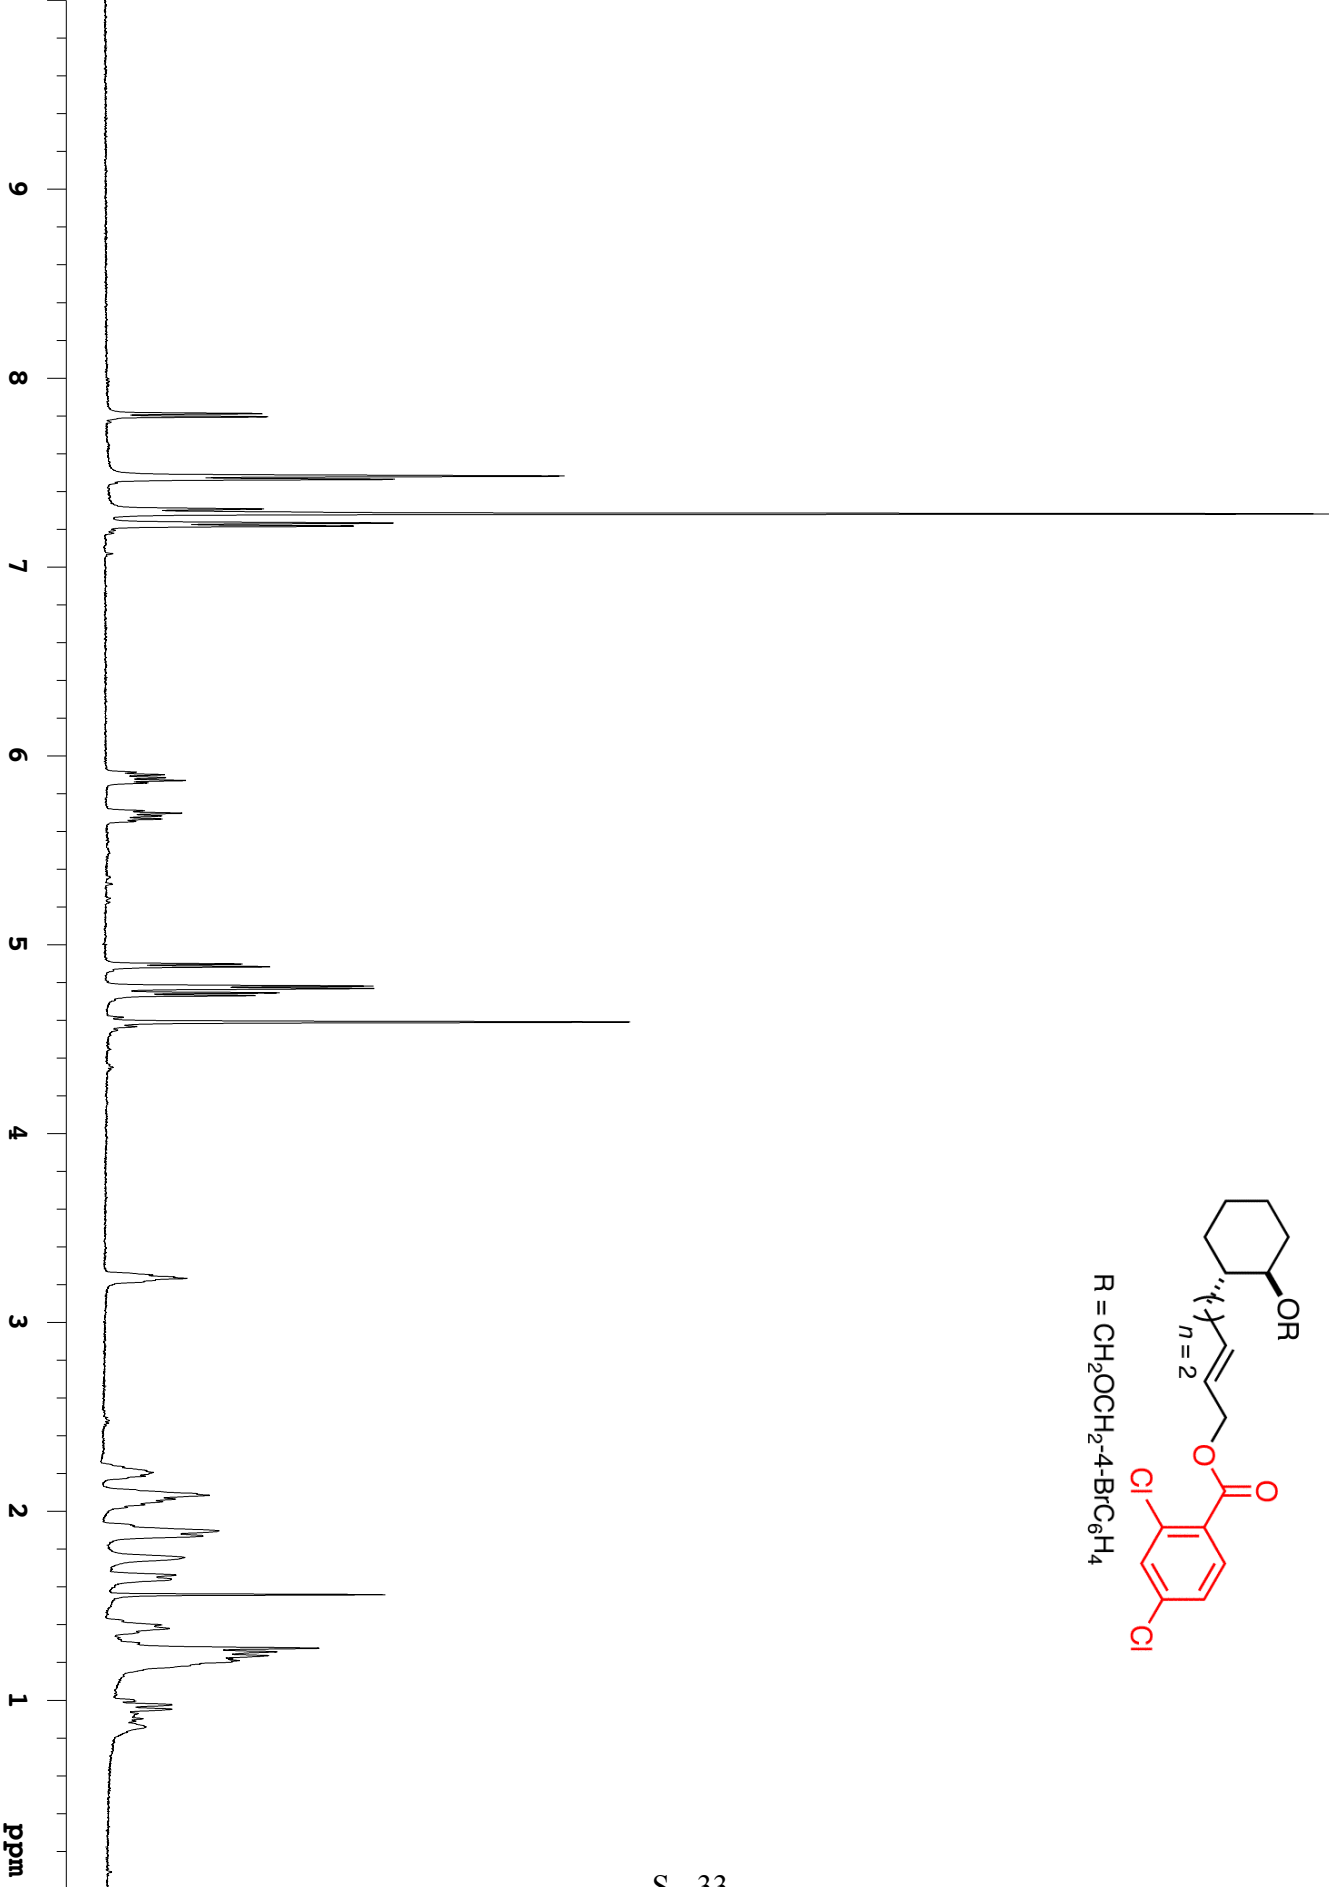



NVT1140. carbon. sub. 2

Pulse Sequence: s2pu1

Solvent: CDCl3

Ambient temperature

UNITY-400 "n400"

Relax. delay 2.000 sec

Pulse 60.0 degrees

Acq. time 1.311 sec

Width 25000.0 Hz

7552 repetitions

OBSERVE C13, 100.5671512 MHz

DECOUPLE H1, 399.9500118 MHz

Power 48 dB

continuously on

WALTZ-16 modulated

DATA PROCESSING

Line broadening 1.0 Hz

FT size 65536

Total time 9 hr, 13 min, 35 sec

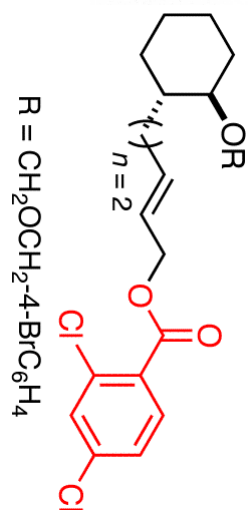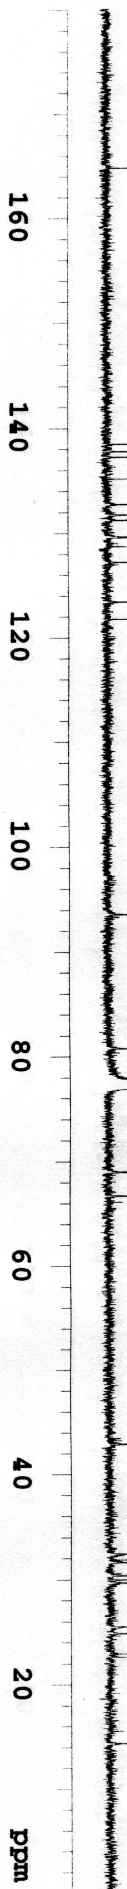

date Mar 21 2008 dfrq 500.070  
 solvent CDC13 dn HI  
 file /export/home/~ dpwr 18  
 data/ui500nb/White~ dof 0  
 /vermeulen/NVVI.m~ dm nmn  
 acrocycle.proton.f~ dmm c  
 id dmf 200

ACQUISITION

sfreq 500.070 dres 1.0  
 tn HI homo n  
 at 4.096 DEQ2  
 np 65536 dfrq2 0  
 sw 8000.0 dn2  
 fb 4000 dpwr2 1  
 bs 1 dof2 0  
 tpwr 55 dm2 n  
 pw 7.7 dmm2 c  
 dl 10.000 dmf2 200

tof 0 dseq2  
 nt 16 dres2 1.0  
 ct 6 homo2 n  
 alock n PROCESSING  
 gain not used lb 0.30

FLAGS

il n proc wfile ft  
 in n fn not used  
 dp y math f  
 hs nm

DISPLAY

sp 91.3 wepr  
 wp 3889.2 wbs  
 vs 131 wnt  
 sc 0  
 wc 250  
 hzmm 15.56  
 is 33.57  
 rfl 1499.6  
 rfp 0  
 th 7  
 ins 100.000  
 ai ph

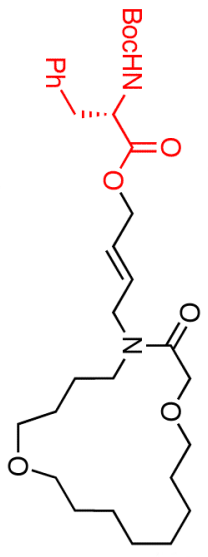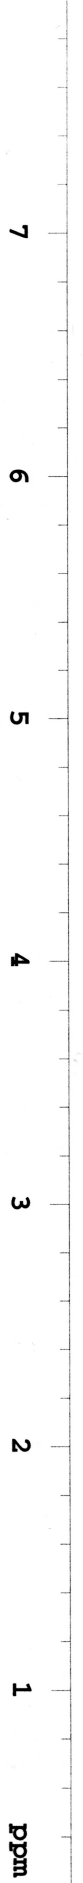

SAMPLE

DEC. & VT

H1

date Mar 21 2008 dn  
 solvent CDC13 dof -1092.3  
 file /export/home/~ dm  
 data/u400/white/ve- dmm YYY  
 rmeulen/NVVirimacro- dmf W  
 13889  
 cycle.carbon.fid dpwr 48

ACQUISITION

PROCESSING

sfrq 100.579 lb 1.00  
 tn C13 wtfile  
 at 1.311 proc ft  
 np 65536 fn not used  
 sw 25000.0 math F  
 fb 13800  
 bs 16 weirr  
 tpwr 54 wexp  
 pw 8.7 wbs  
 dl 1.000 wnt  
 tof 1966.4 DISPLAY 142.7  
 nt 100000 sp 19918.8  
 ct 14960 wp 162  
 alock n vs  
 gain not used sc 0  
 FLAGS wc 250  
 il n Inzmm 79.68  
 in n is 500.00  
 dp y rfl 910.1  
 hs nm rfp 0  
 th 20  
 lns 100.000  
 mm ph

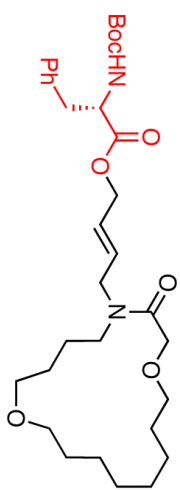

S-36

180 160 140 120 100 80 60 40 20 ppm

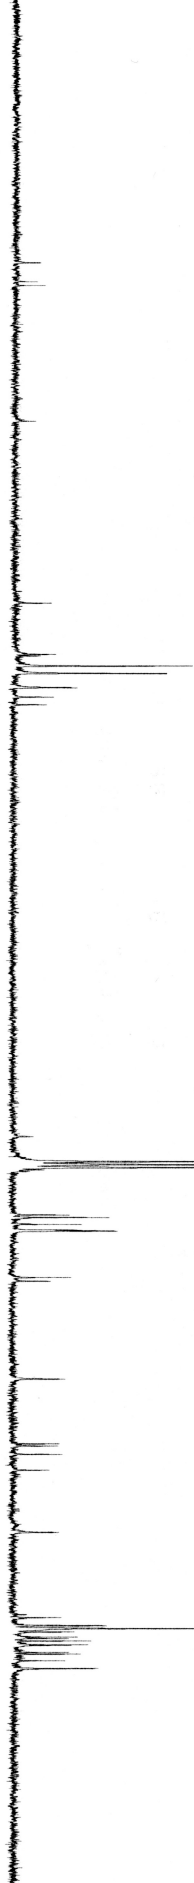

Pulse Sequence: s2pul

Solvent: CDCl3

Ambient temperature

INOVA-500 "v1500nb"

Relax. delay 10.000 sec

Pulse 90.0 degrees

Acq. time 4.096 sec

Width 8000.0 Hz

4 repetitions

OBSERVE H1, 500.0677750 MHz

DATA PROCESSING

Line broadening 0.3 Hz

FT size 65536

Total time 1 min, 52 sec

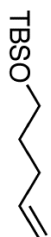

S - 37

8 7 6 5 4 3 2 1 -0 ppm

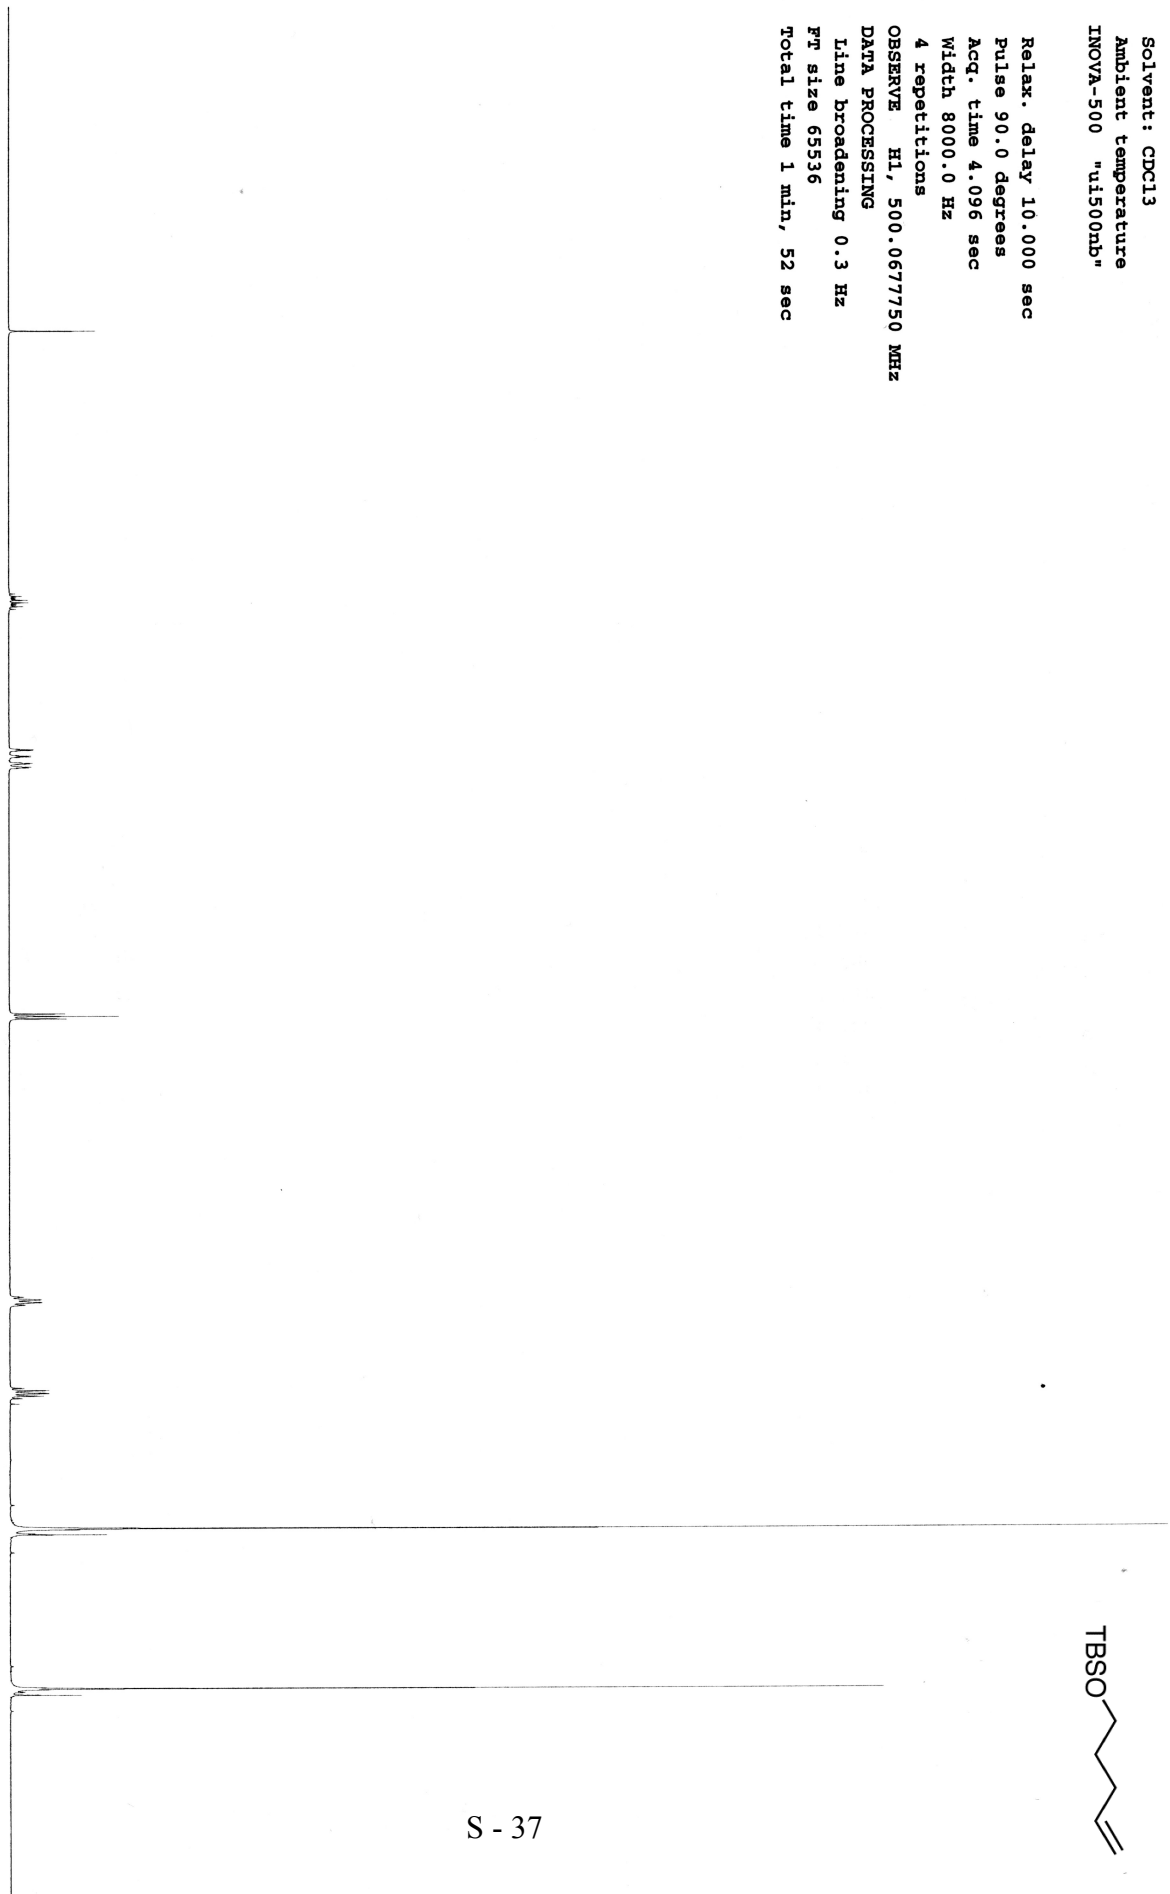

Pulse Sequence: s2pul

Solvent: CDCl3

Ambient temperature

UNITY-400 "v4.00"

Relax. delay 5.000 sec

Pulse 45.0 degrees

Acq. time 4.096 sec

Width 8000.0 Hz

15 repetitions

OBSERVE H1, 399.9486782 MHz

DATA PROCESSING

Line broadening 0.3 Hz

Ft size 65536

Total time 4 min, 51 sec

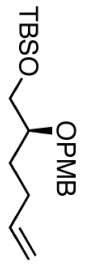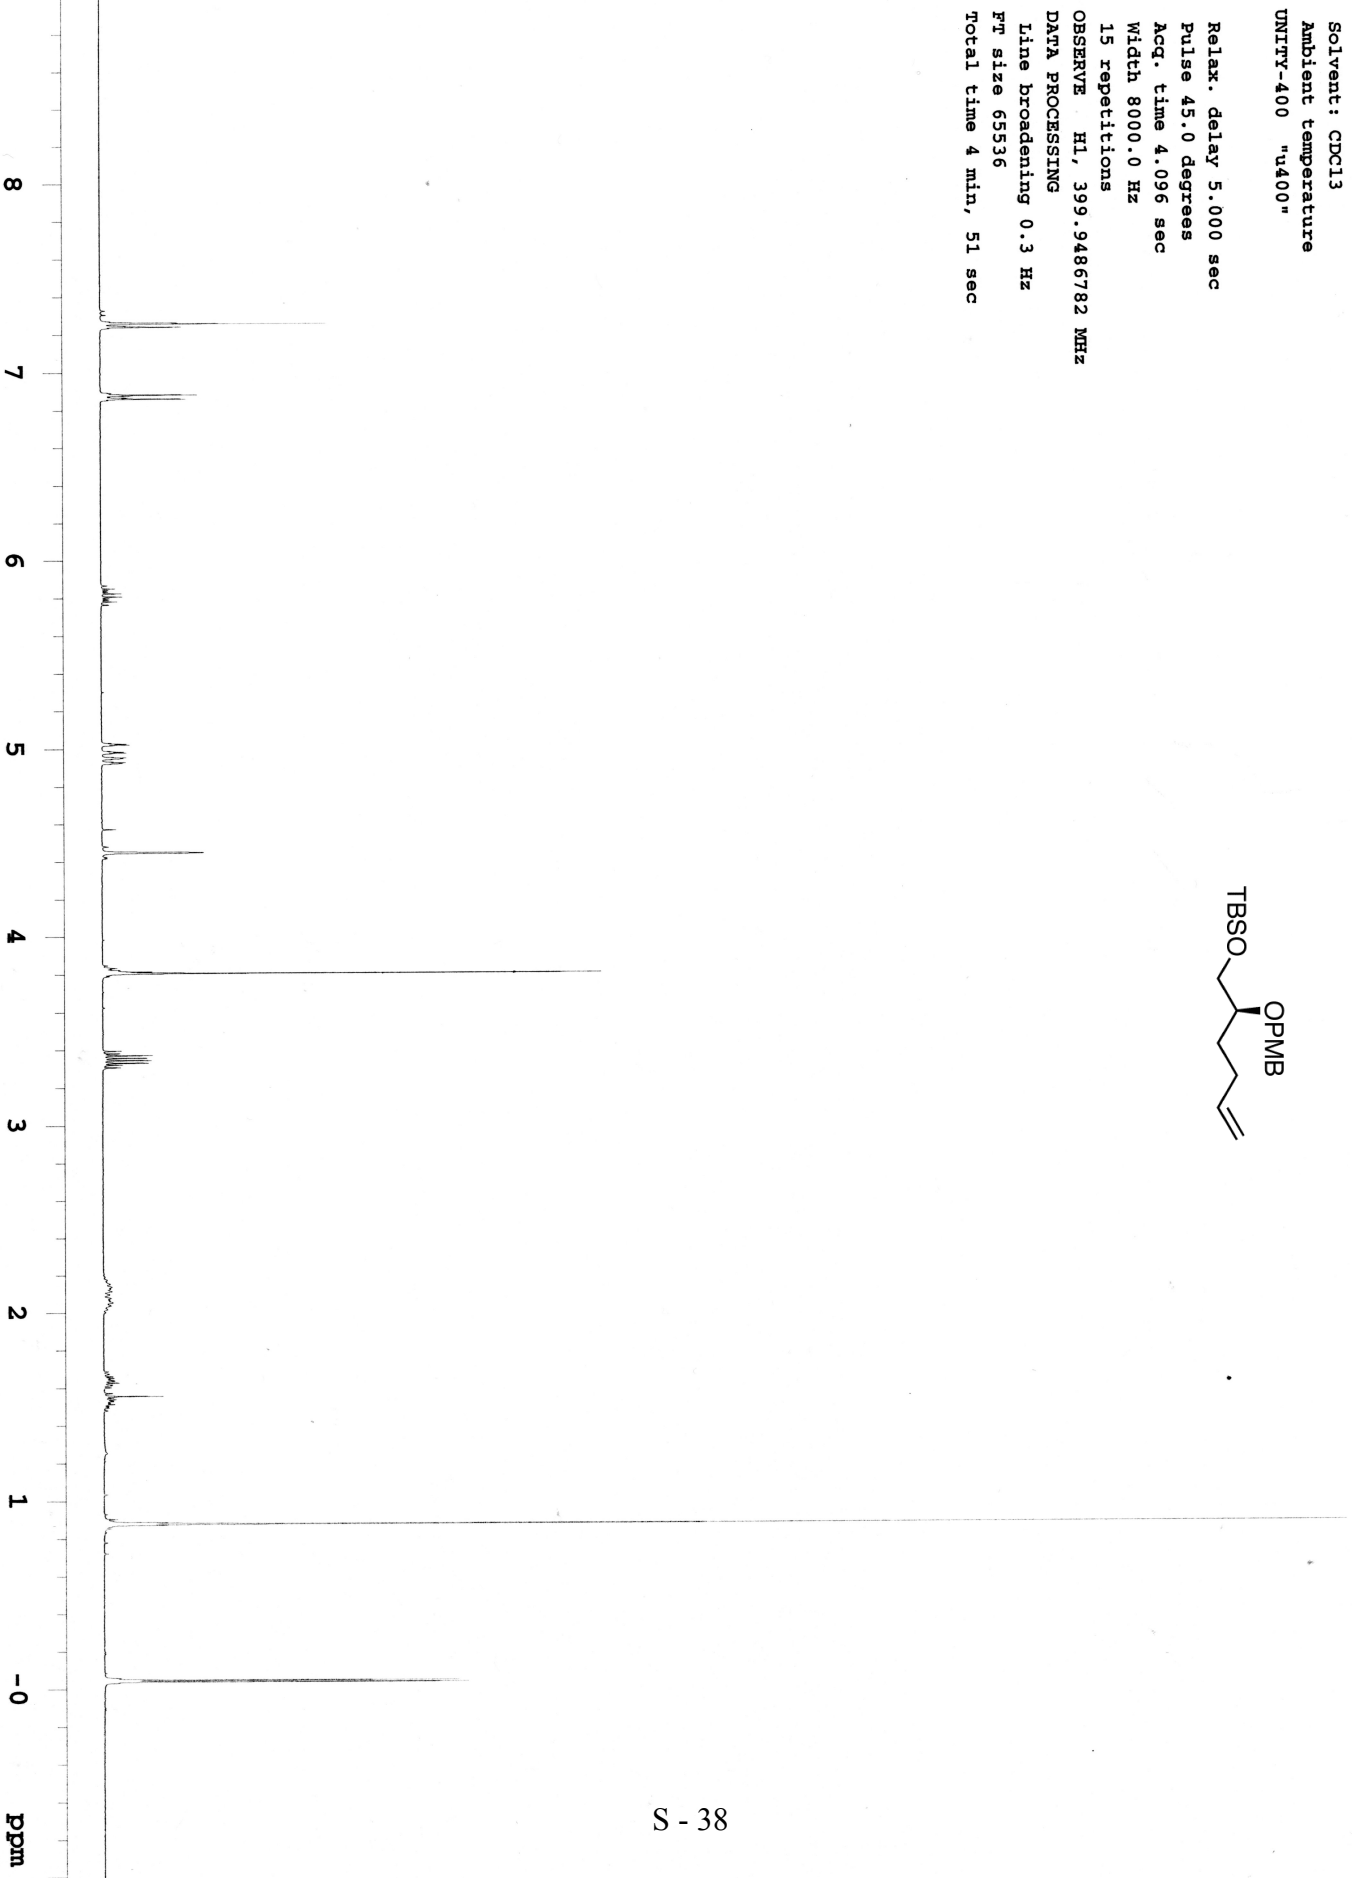

Pulse Sequence: s2pul

Solvent: CDCl3

Ambient temperature

UNITY-400 "u400"

Relax. delay 10.000 sec

Pulse 45.0 degrees

Acq. time 4.096 sec

Width 8000.0 Hz

7 repetitions

OBSERVE H1, 399.9486780 MHz

DATA PROCESSING

Line broadening 0.3 Hz

FT size 65536

Total time 7 min, 31 sec

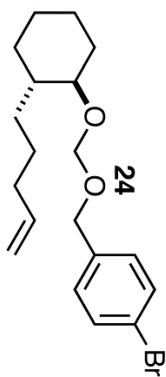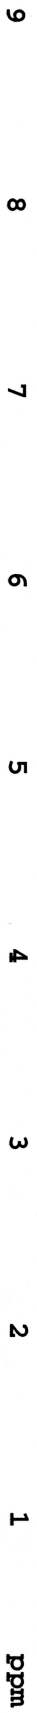



Pulse Sequence: s2pul

Solvent: CDCl3

Ambient temperature

UNITY-400 "u400"

Relax. delay 1.000 sec

Pulse 45.0 degrees

Acq. time 1.311 sec

Width 25000.0 Hz

550 repetitions

OBSERVE C13, 100.5671512 MHz

DECOUPLE H1, 399.9500118 MHz

Power 48 dB

continuously on

WALTZ-16 modulated

DATA PROCESSING

Line broadening 1.0 Hz

FW size 65536

Total time 1 hr, 19 min, 14 sec

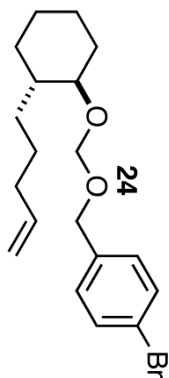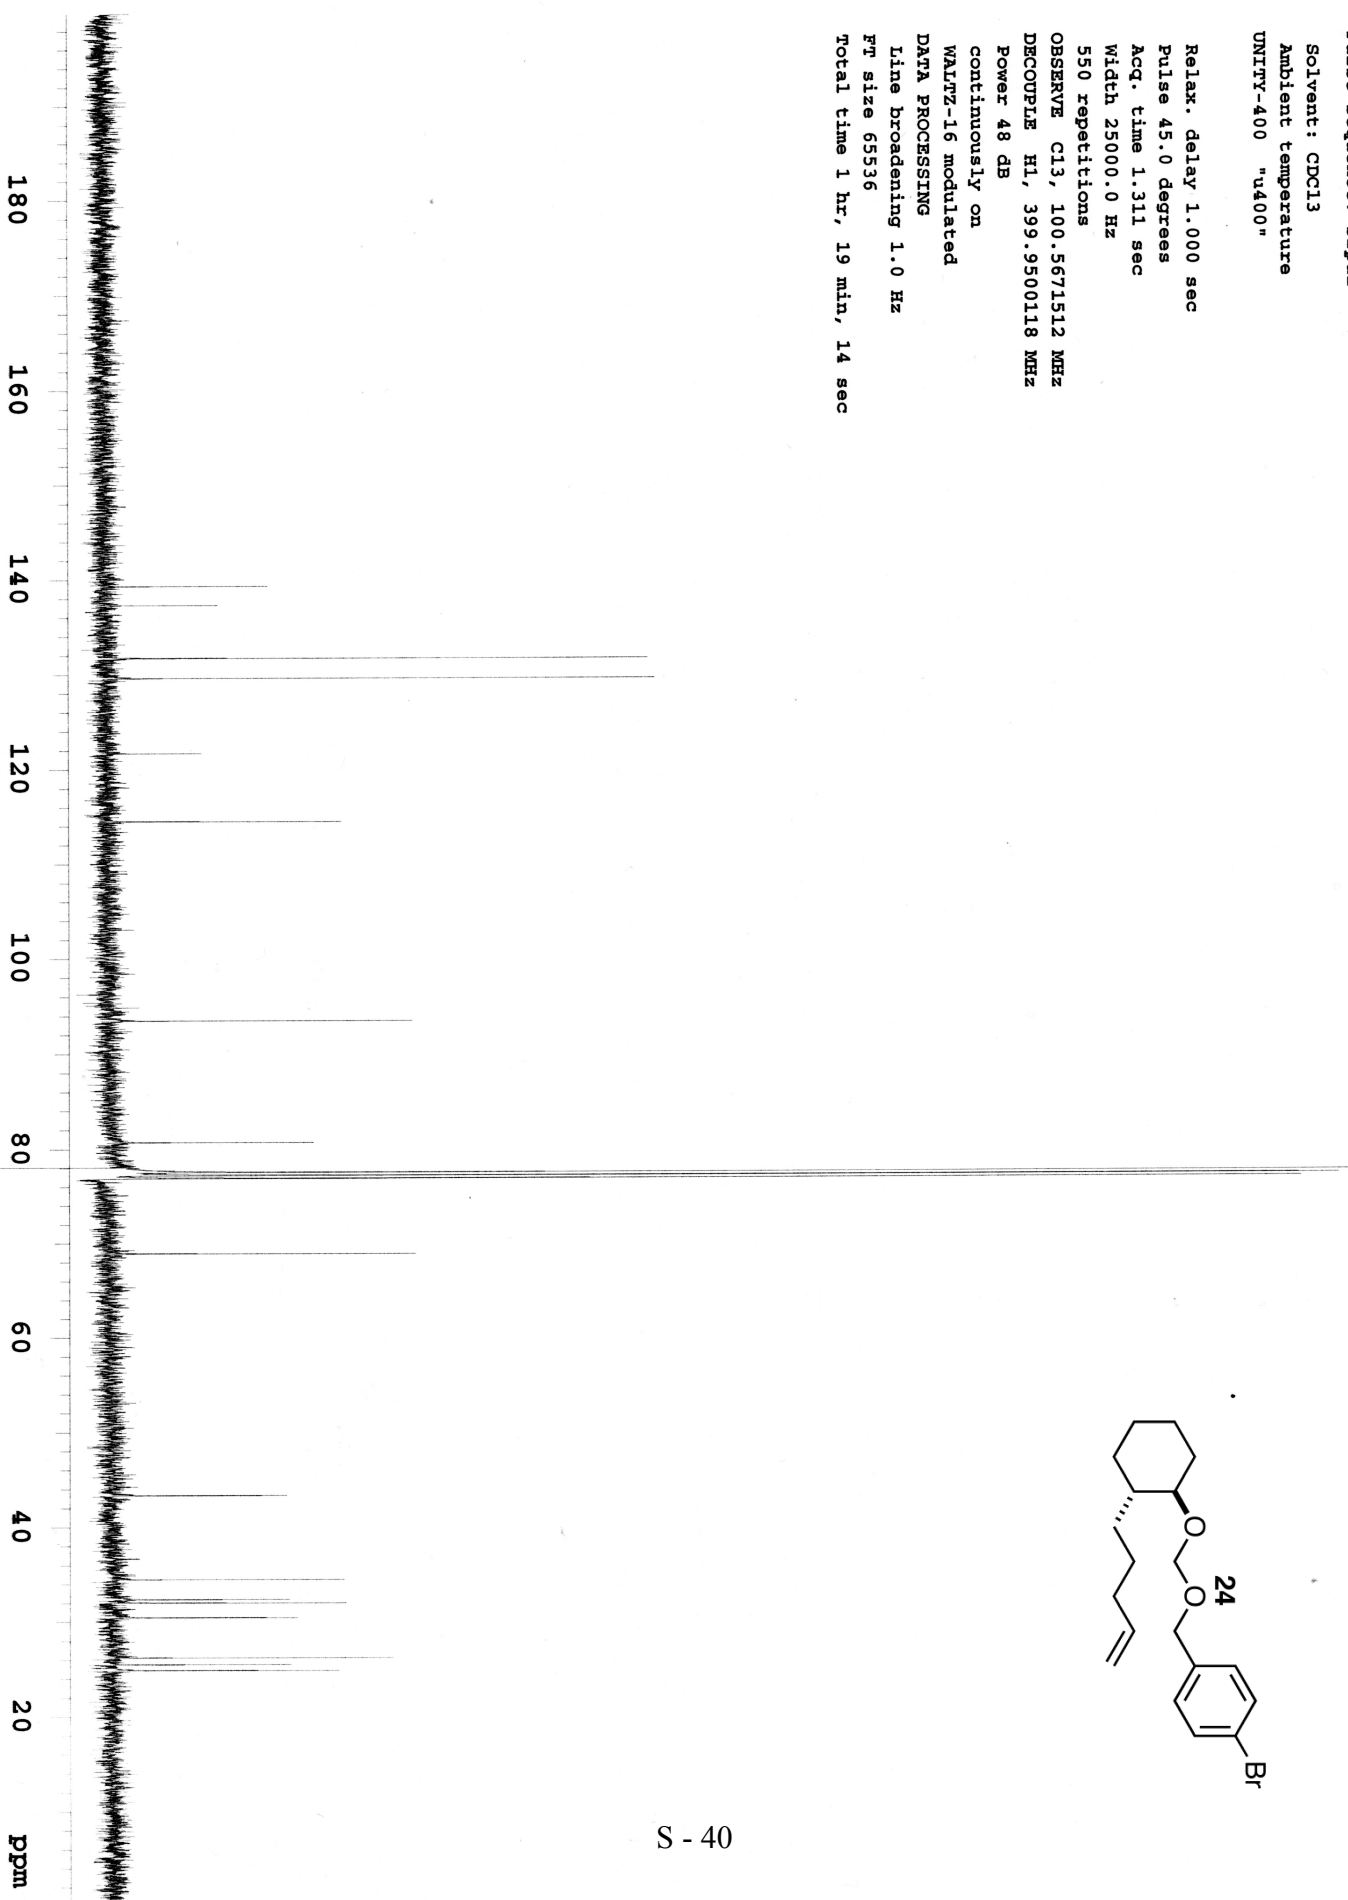

Solvent: CDCl3  
Ambient temperature  
UNITX-400 "u400"

Relax. delay 5.000 sec  
Pulse 45.0 degrees  
Acq. time 4.096 sec  
Width 8000.0 Hz  
4 repetitions  
OBSERVE H1, 399.9486780 MHz  
DATA PROCESSING  
Line broadening 0.3 Hz  
FT size 65536  
Total time 4 min, 51 sec

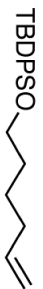

9  
8  
7  
6  
5  
4  
3  
2  
1  
ppm

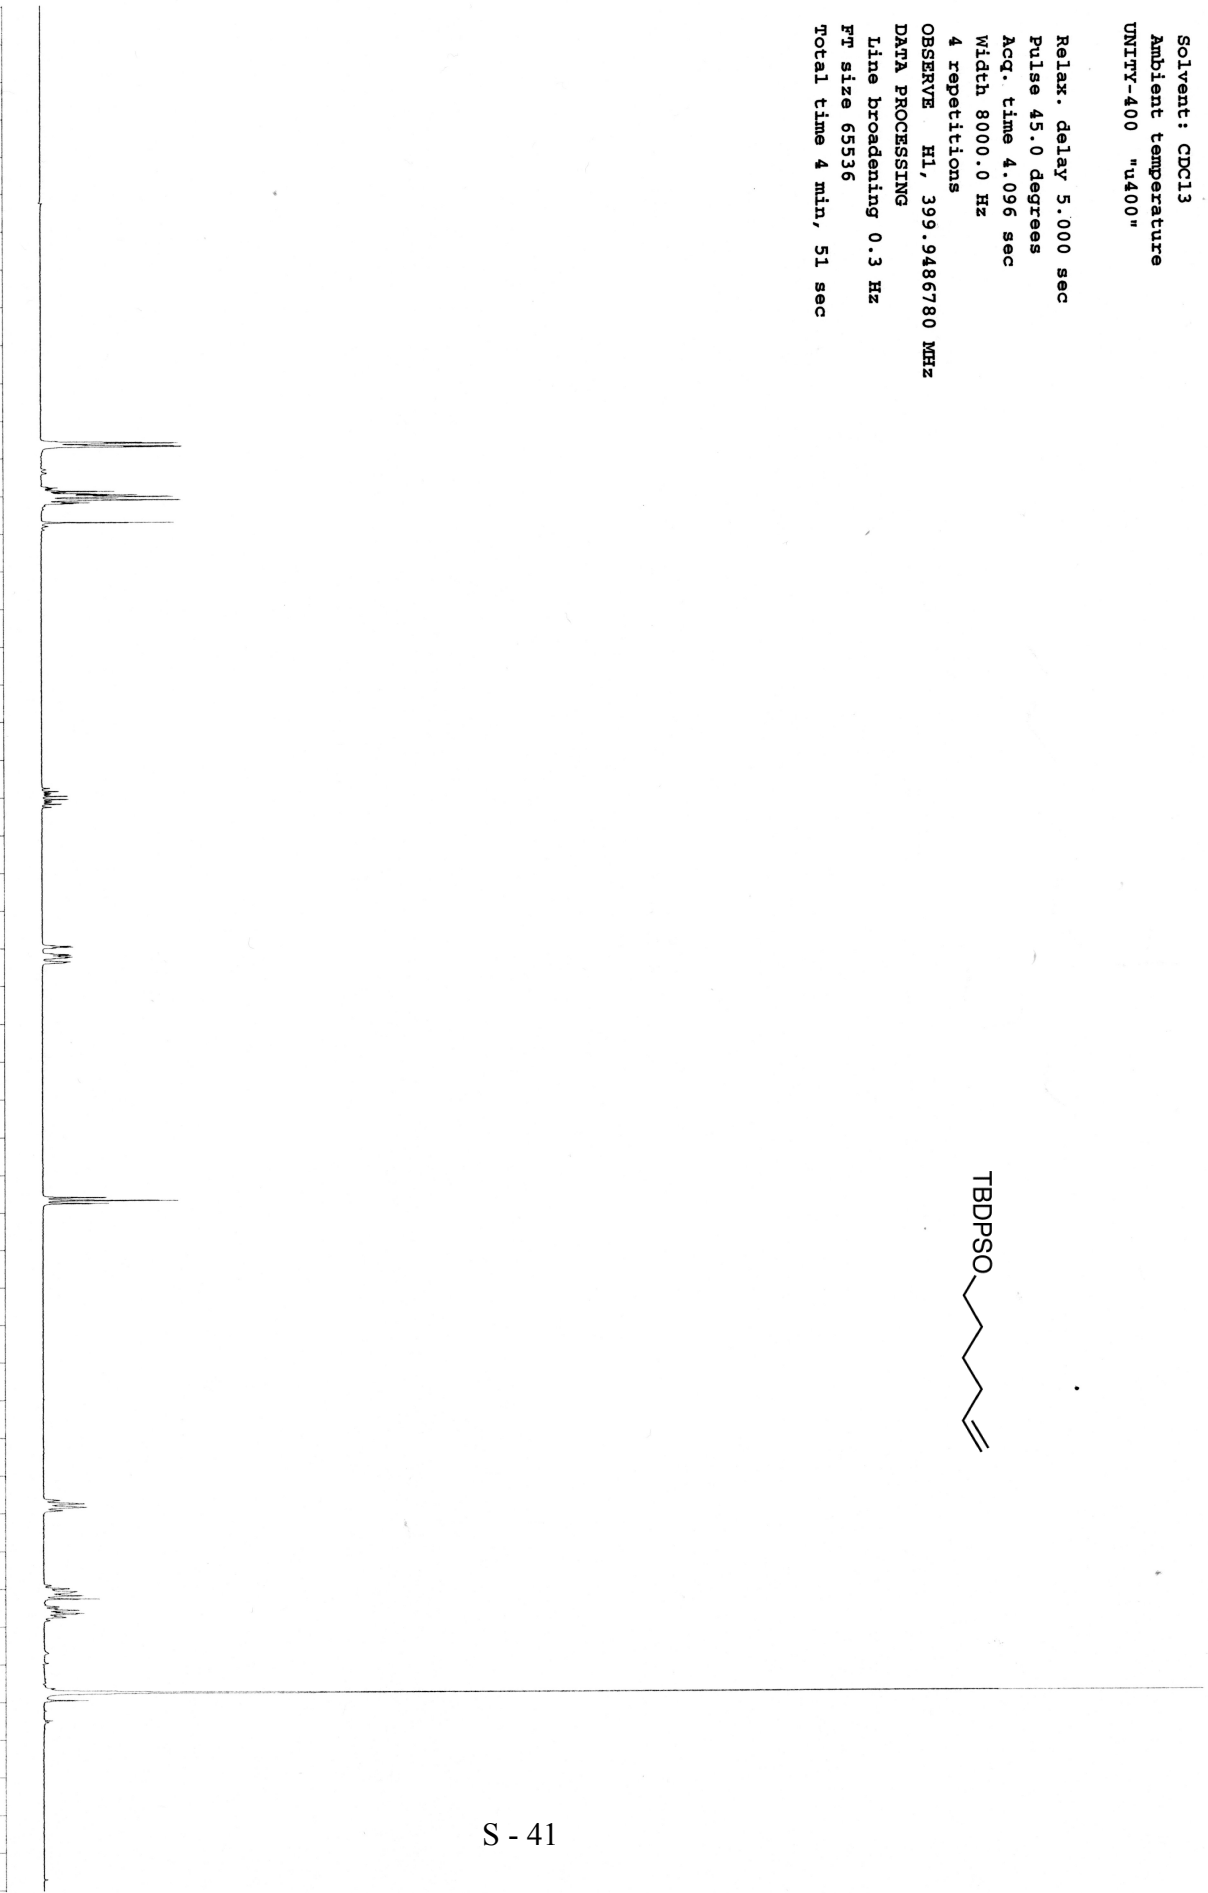

Pulse Sequence: s2pul  
Solvent: CDC13  
Ambient temperature  
UNITRY-400 "v400"

Relax. delay 1.000 sec  
Pulse 45.0 degrees  
Acq. time 1.311 sec  
Width 25000.0 Hz

32 repetitions

OBSERVE C13, 100.5671512 MHz  
DECOUPLE H1, 399.9500118 MHz

Power 48 dB

continuously on

WALTZ-16 modulated

DATA PROCESSING

Line broadening 1.0 Hz

Ft size 65536

Total time 19 min, 48 sec

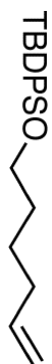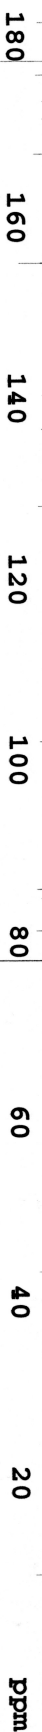

Pulse Sequence: s2pul

Solvent: CDCl3

Ambient temperature

INOVA-500 "vkr500"

Relax. delay 5.000 sec

Pulse 60.0 degrees

Acq. time 4.096 sec

Width 8000.0 Hz

16 repetitions

OBSERVE H1, 499.4298995 MHz

DATA PROCESSING

Line broadening 0.3 Hz

FT size 65536

Total time 4 min, 51 sec

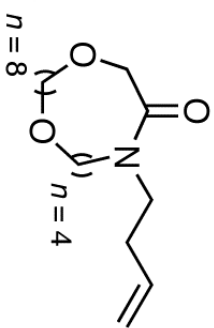

9  
8  
7  
6  
5  
4  
3  
2  
1  
ppm

Pulse Sequence: s2pul

Solvent: CDCl3

Ambient temperature

User: 1-14-87

INOVA-500 "vxr500"

Relax. delay 1.000 sec

Pulse 60.0 degrees

Acq. time 1.024 sec

Width 32000.0 Hz

1232 repetitions

OBSERVE C13, 125.5817166 MHz

DECOUPLE H1, 499.4315638 MHz

Power 46 dB

continuously on

WALTZ-16 modulated

DATA PROCESSING

Line broadening 1.0 Hz

FT size 65536

Total time 5 hr, 38 min, 49 sec

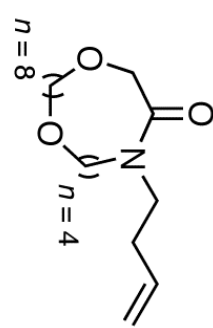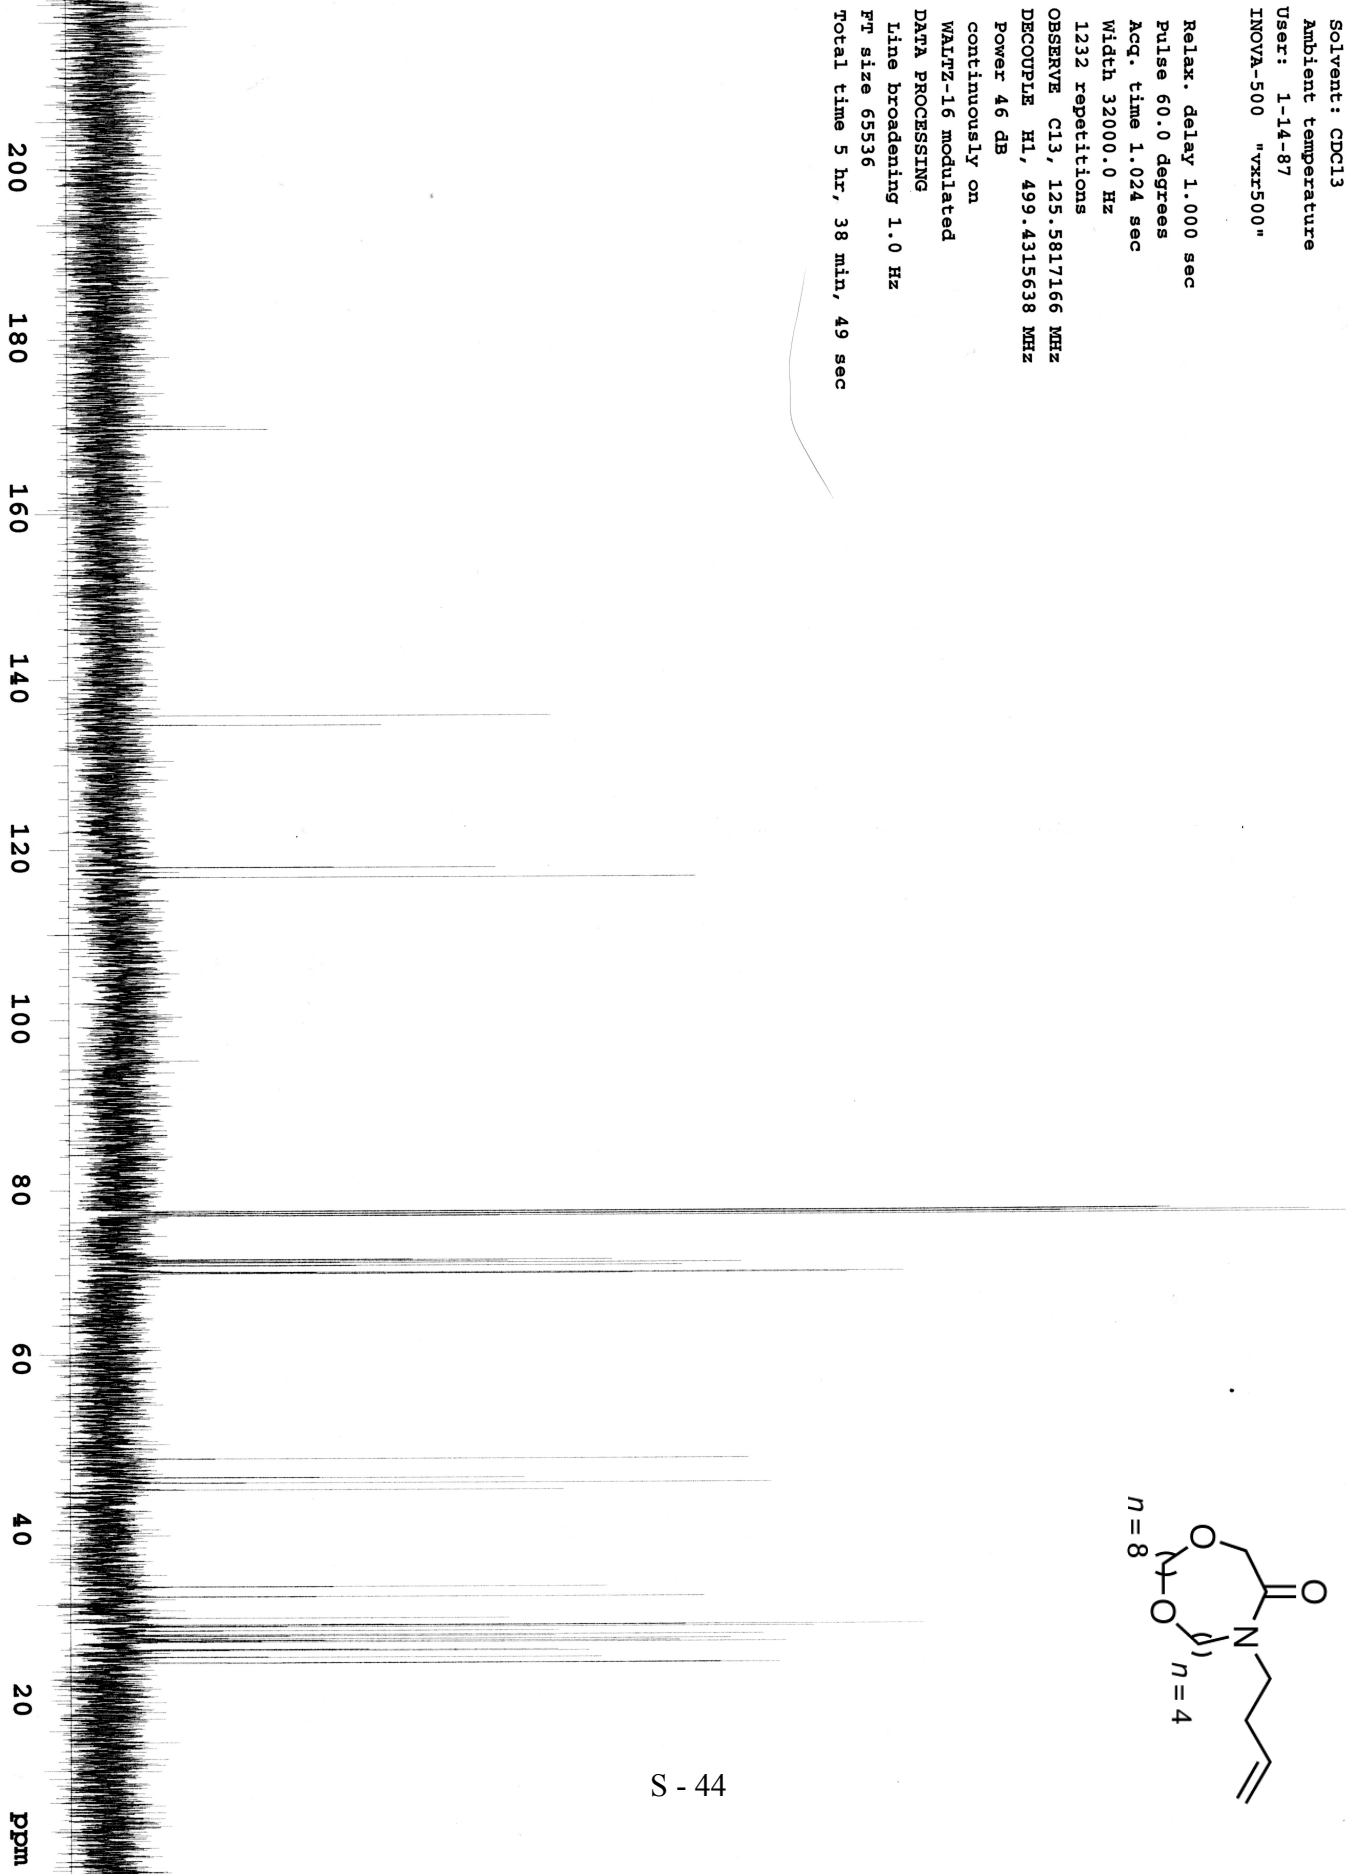

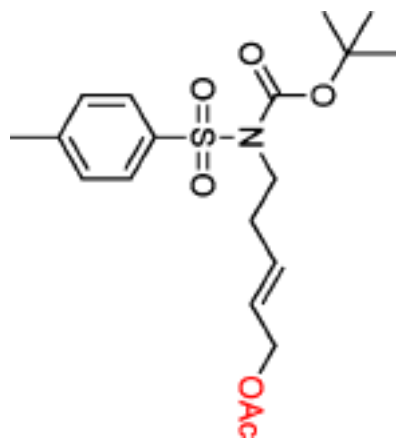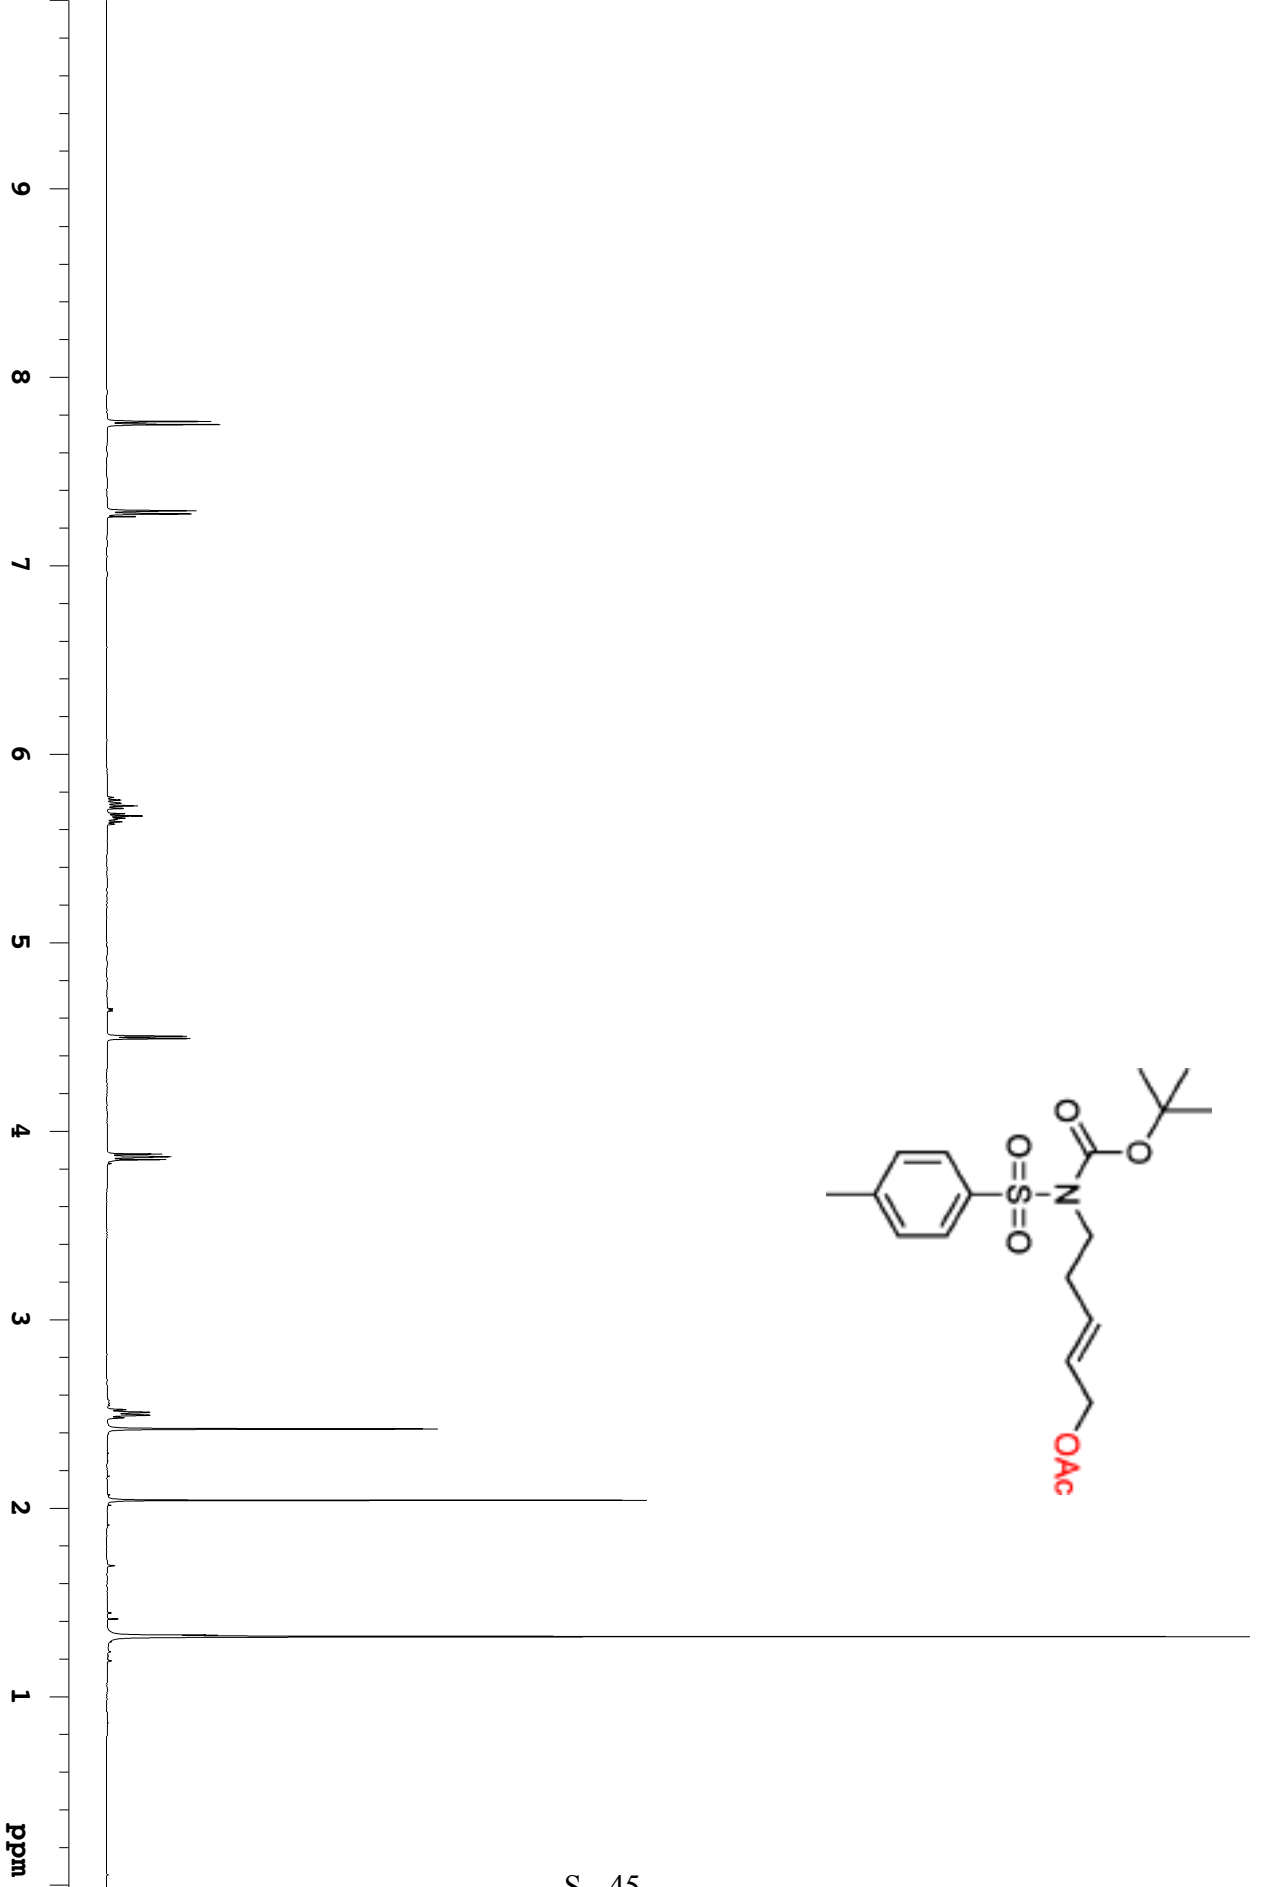



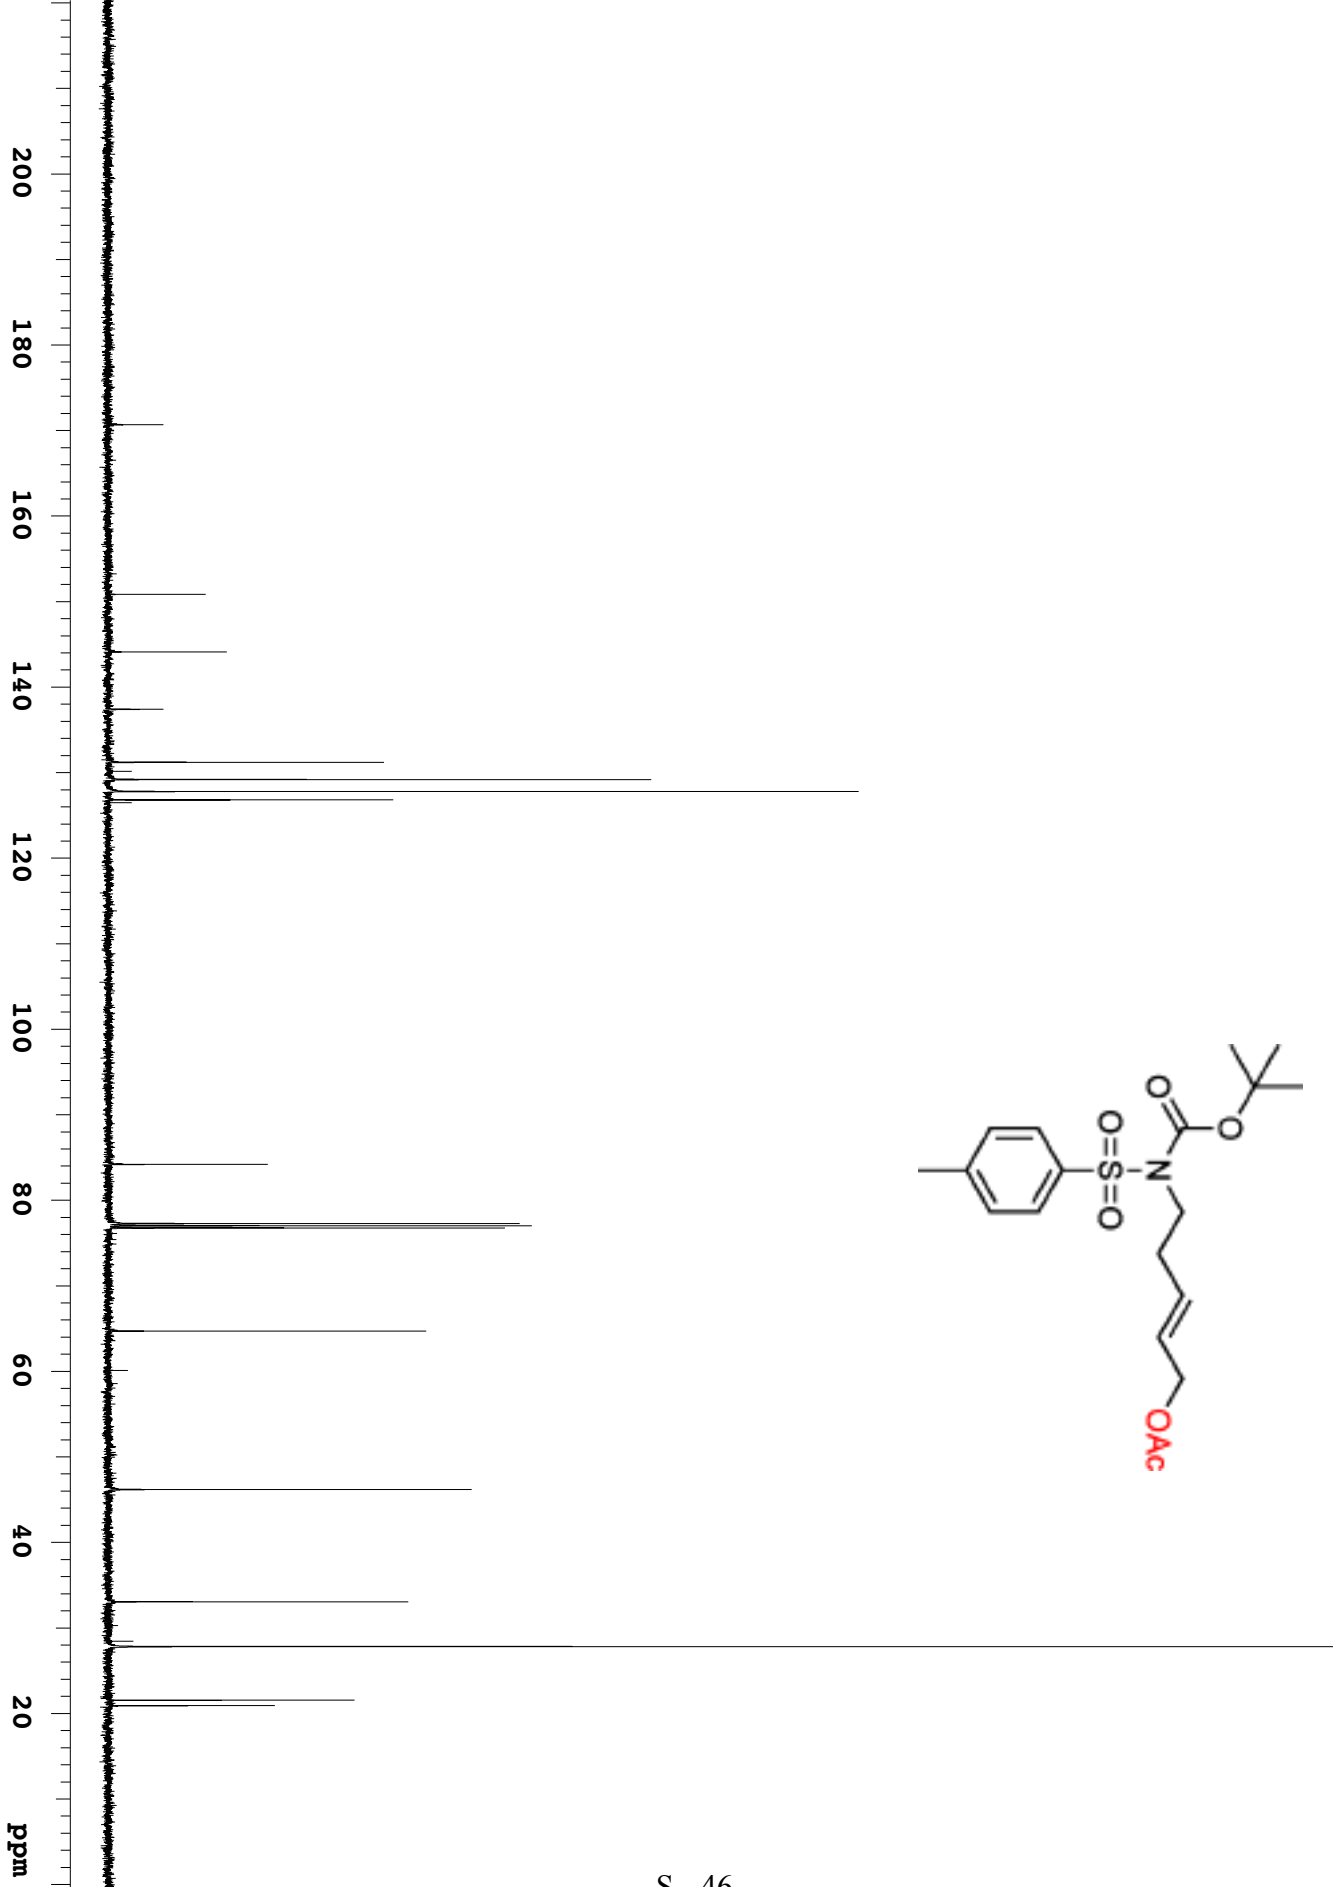

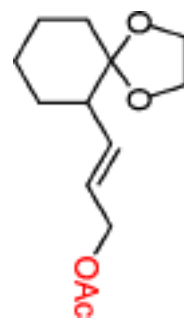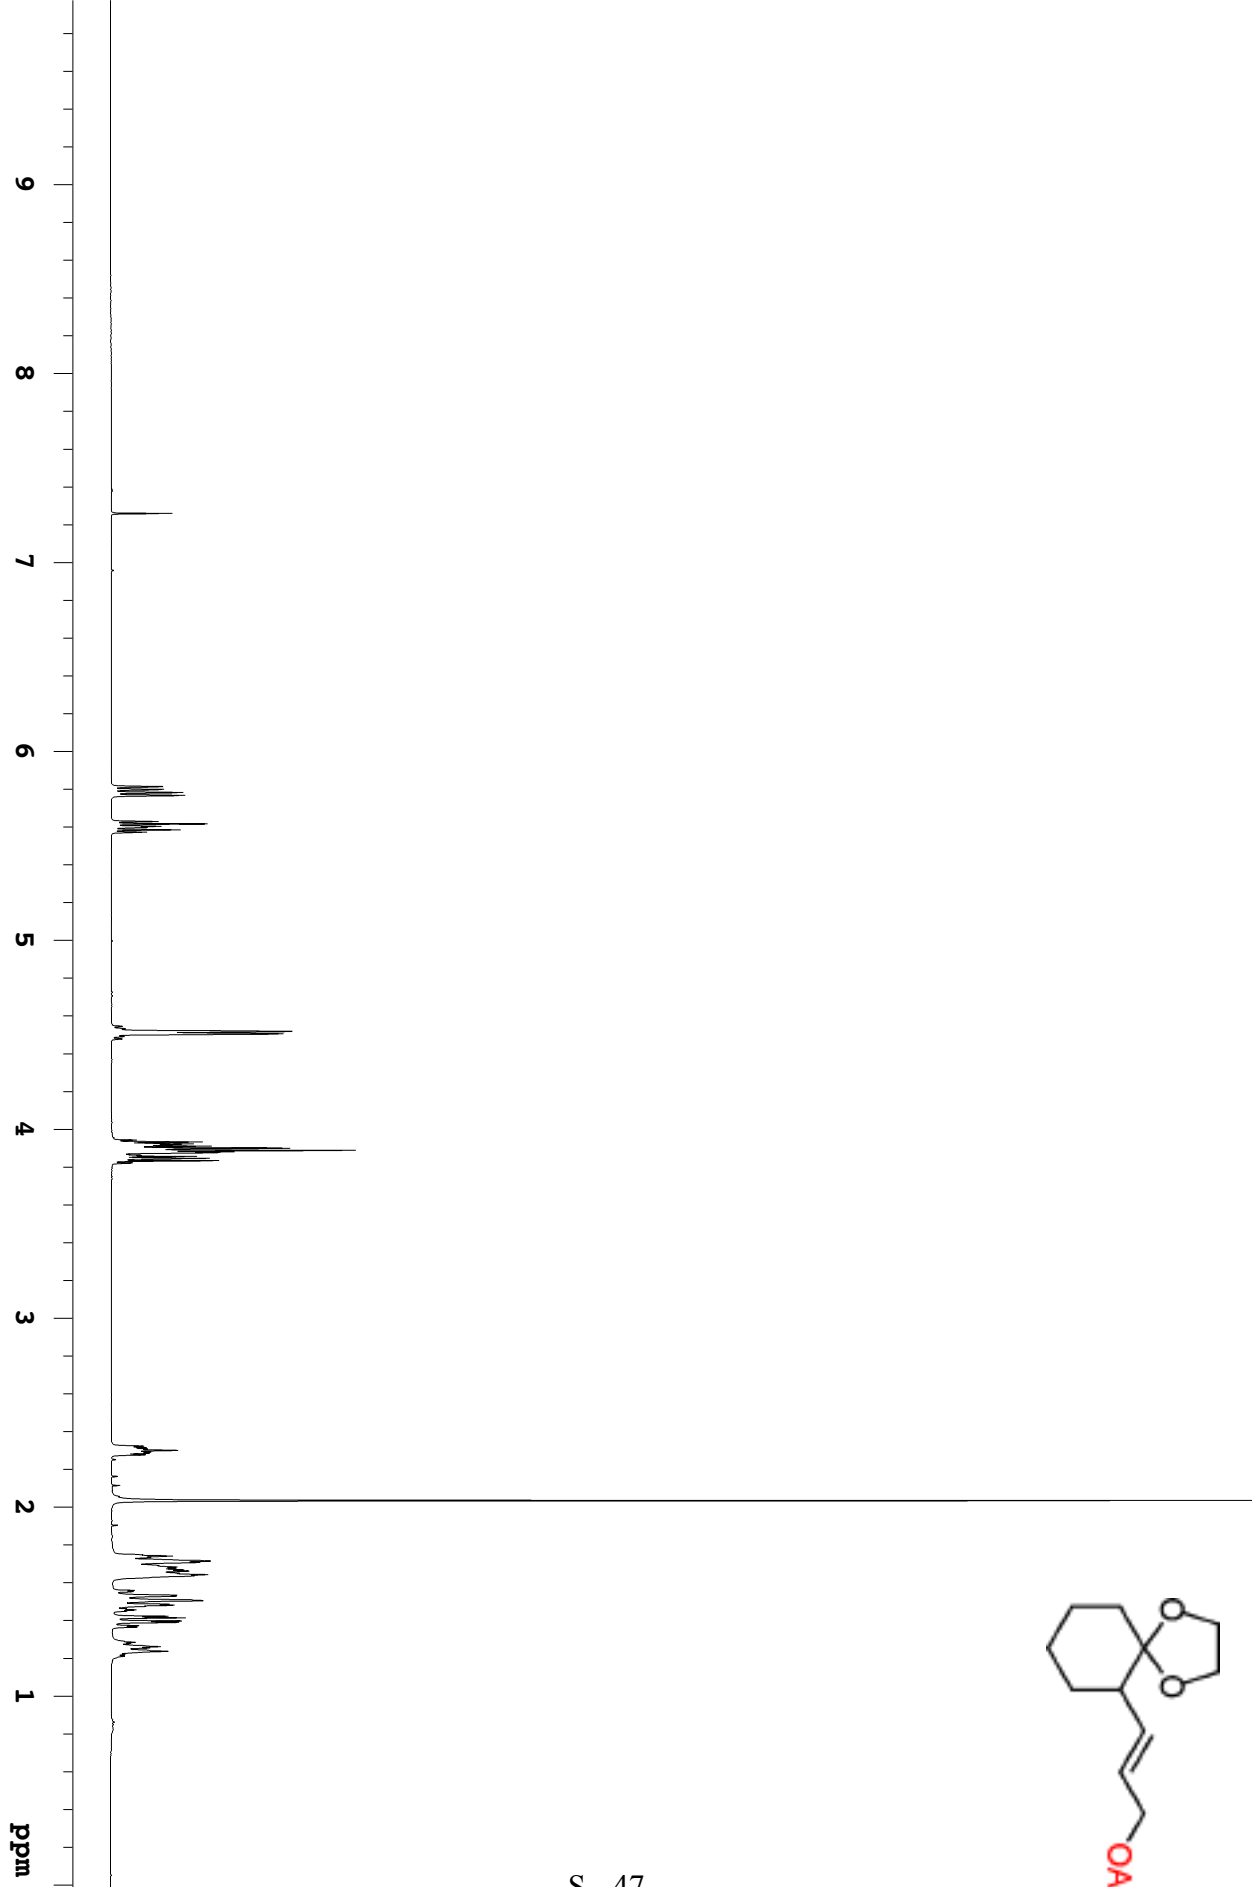

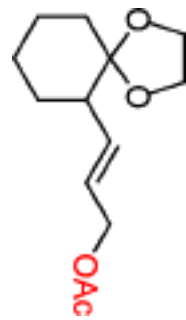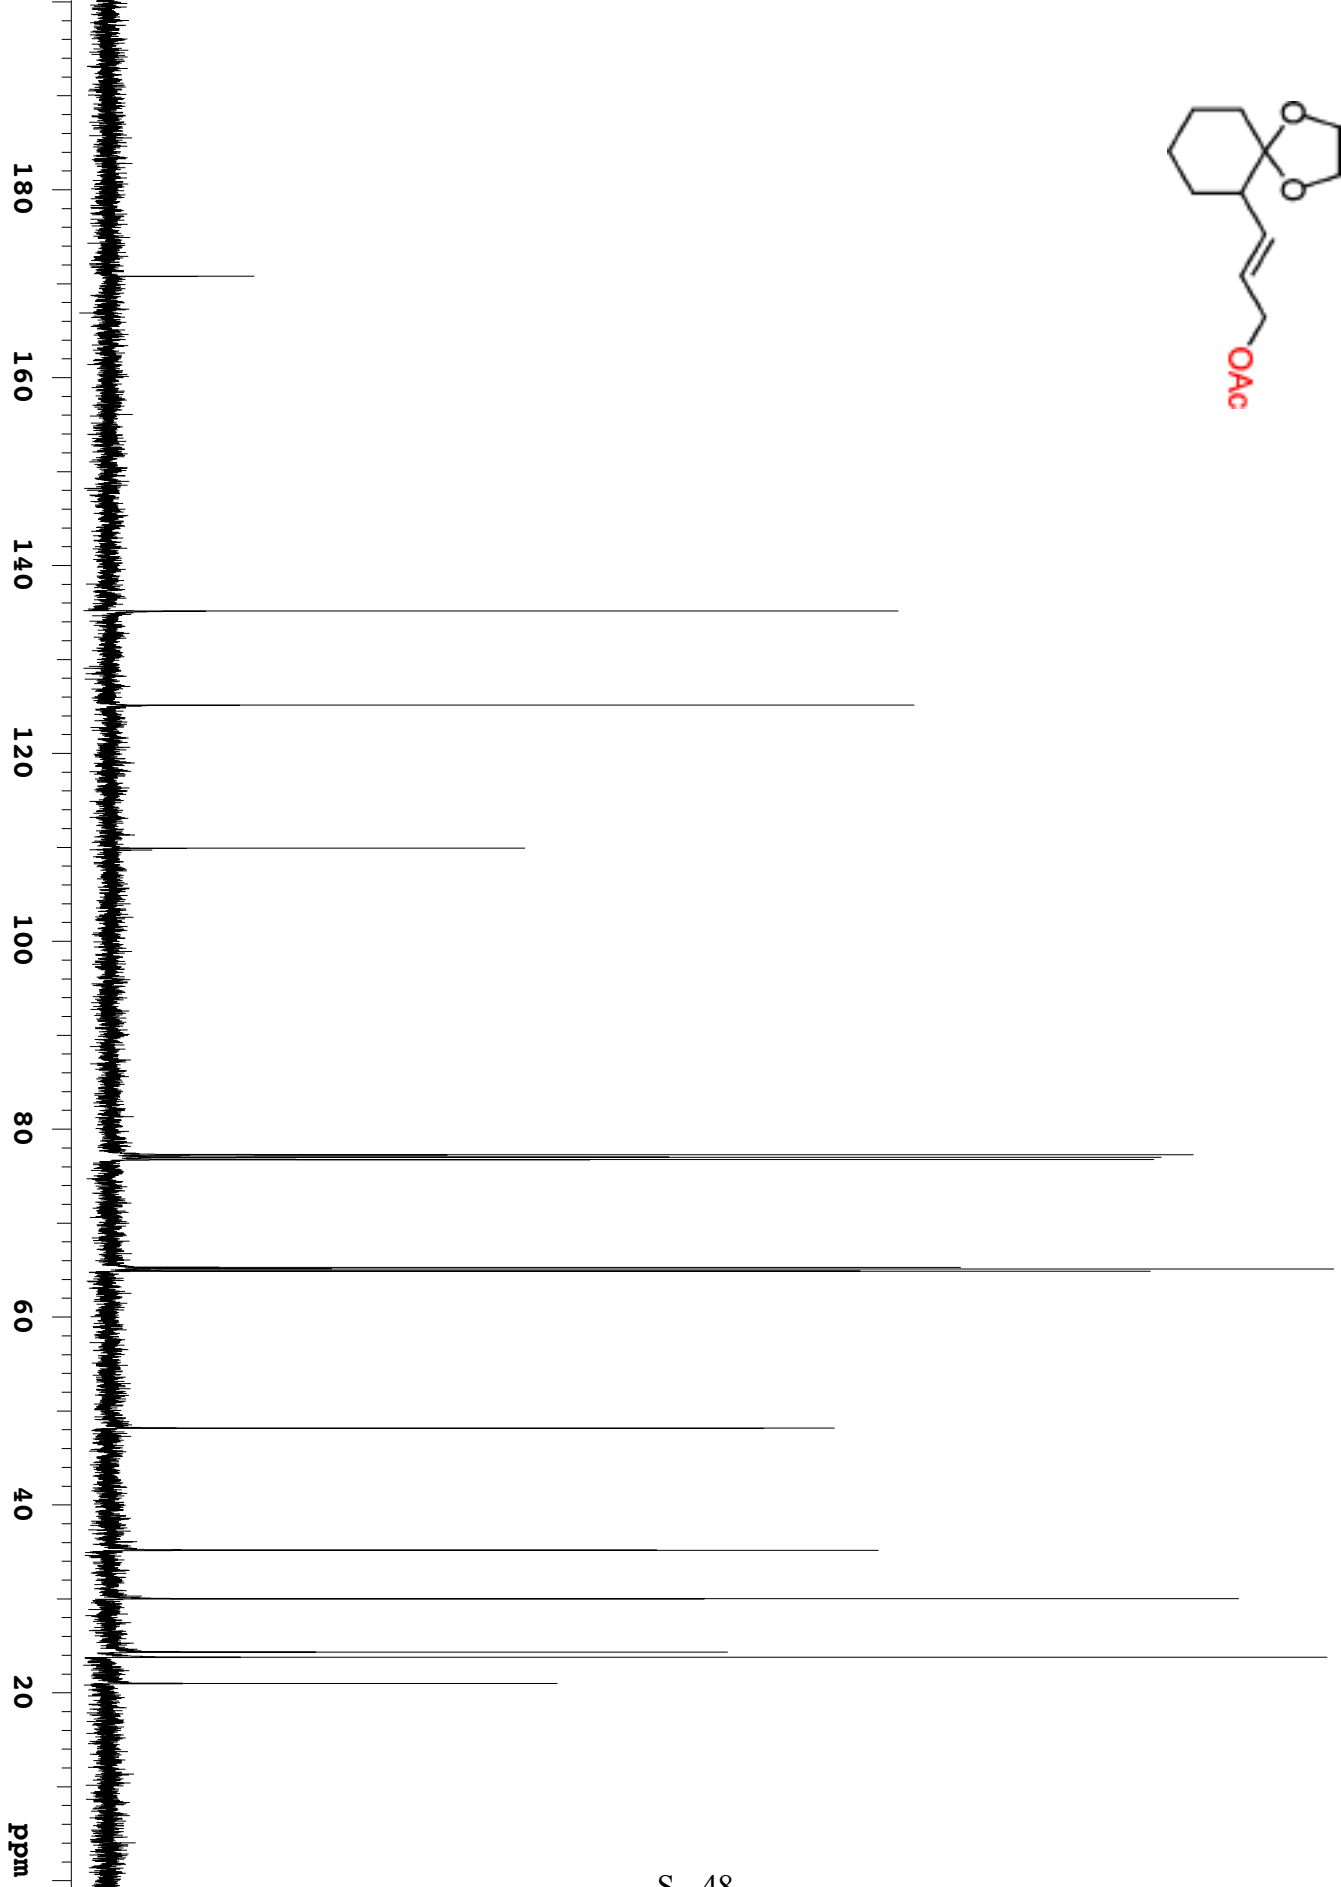

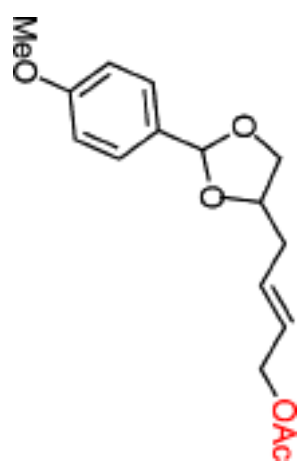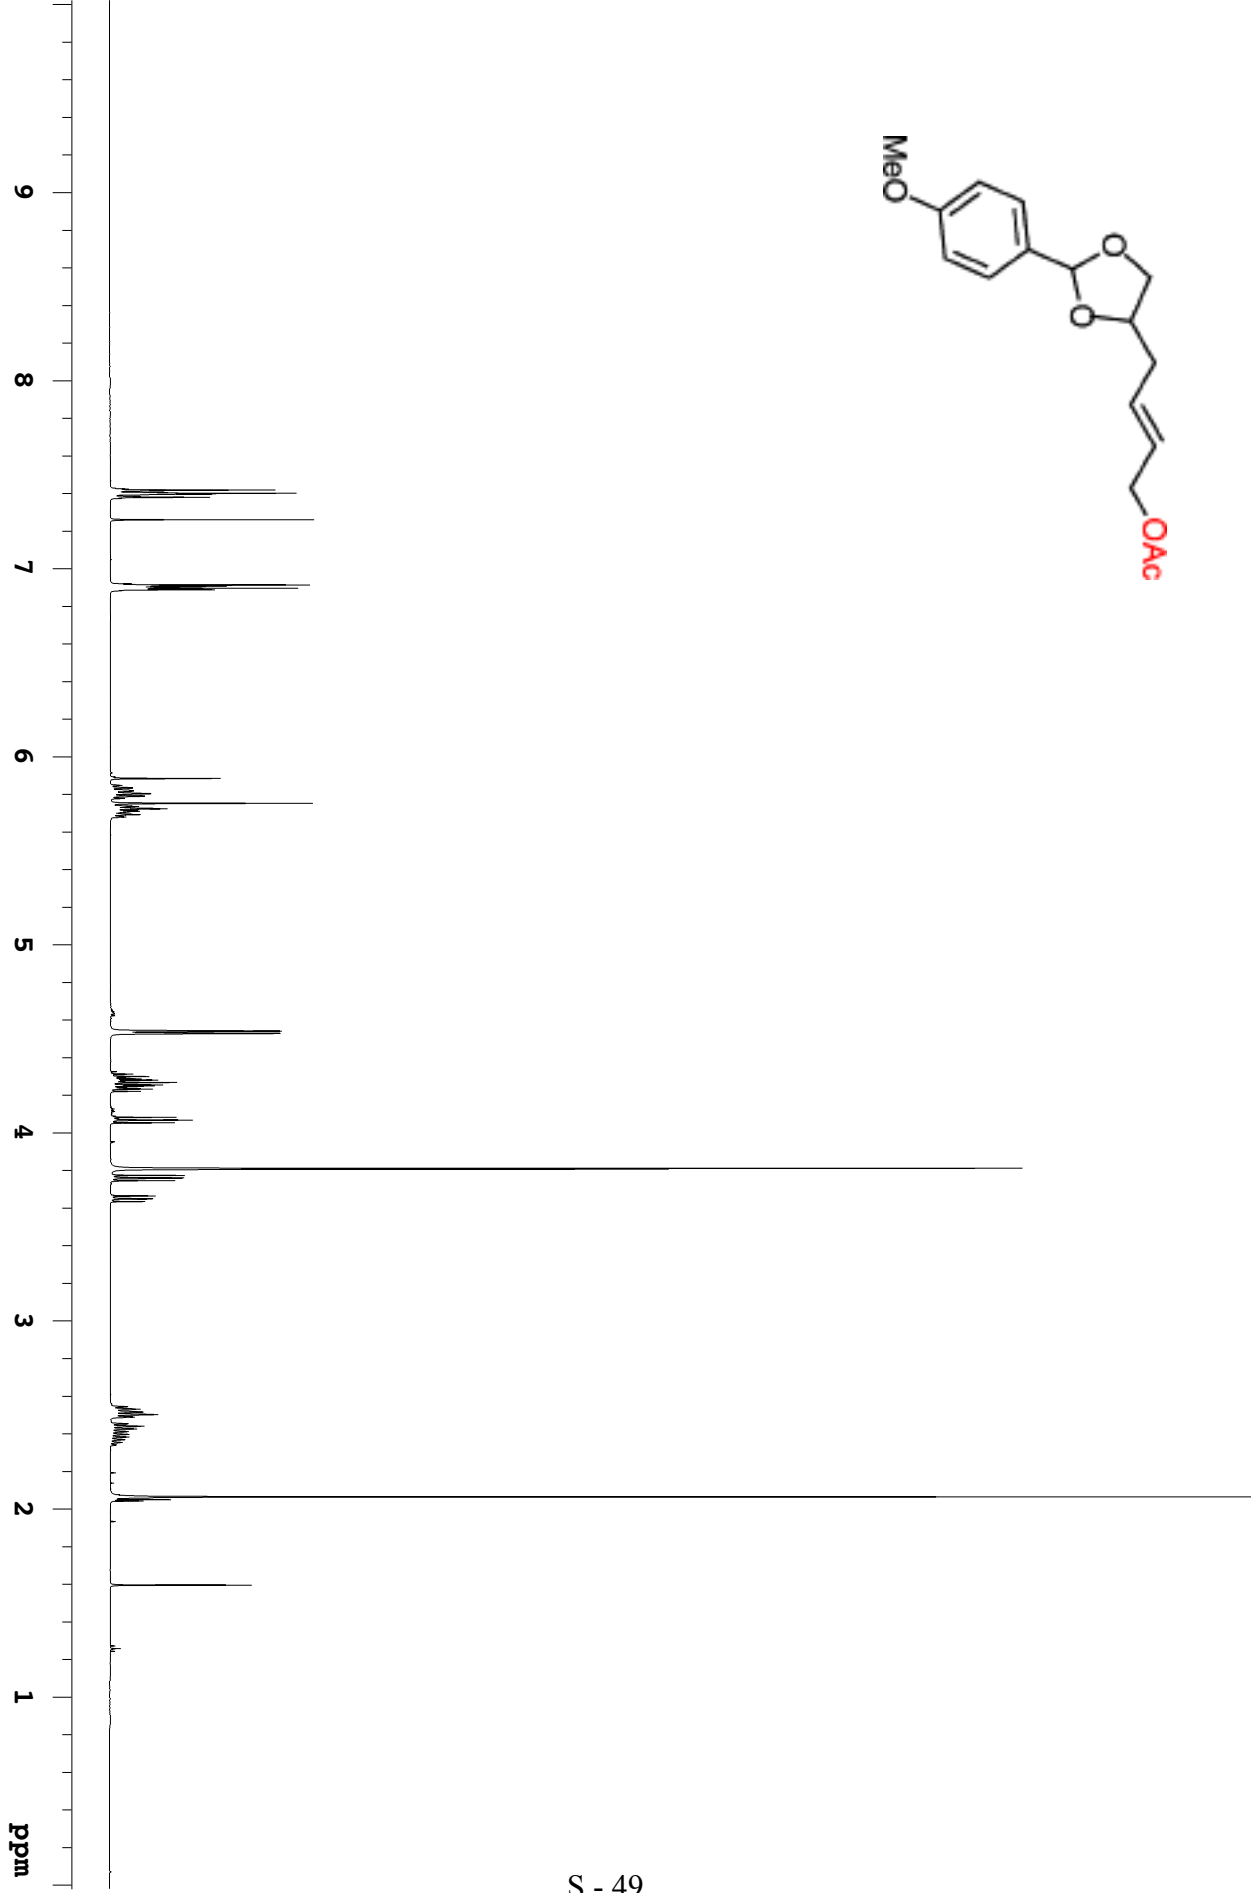

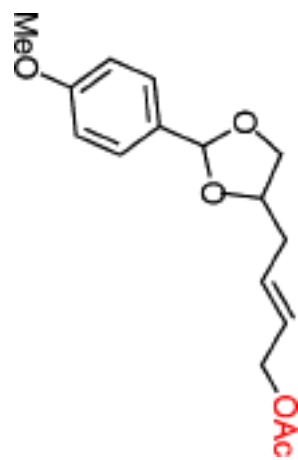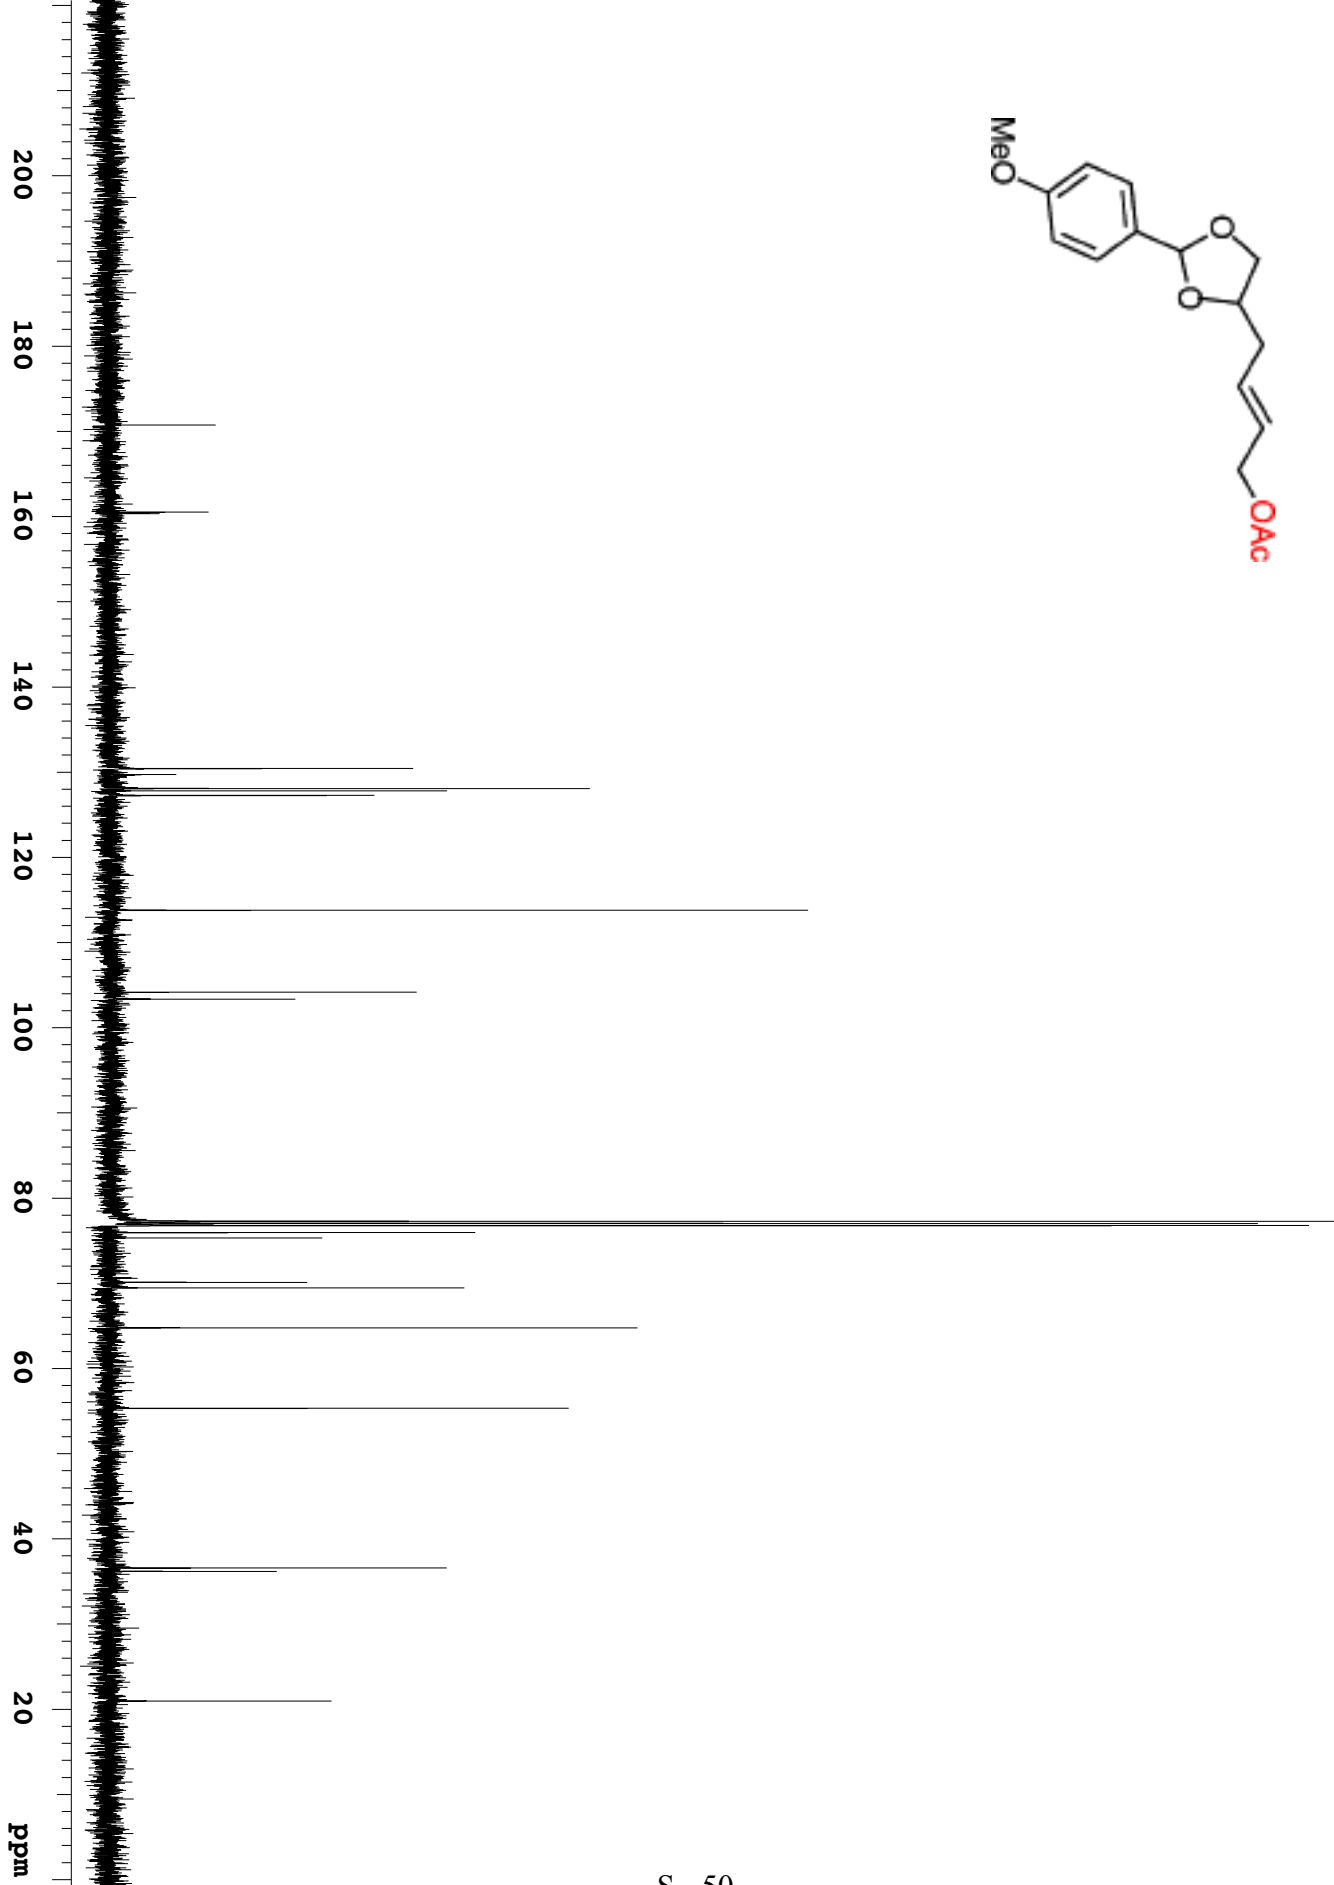

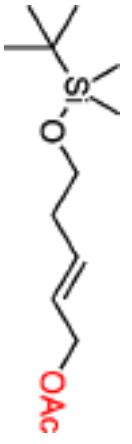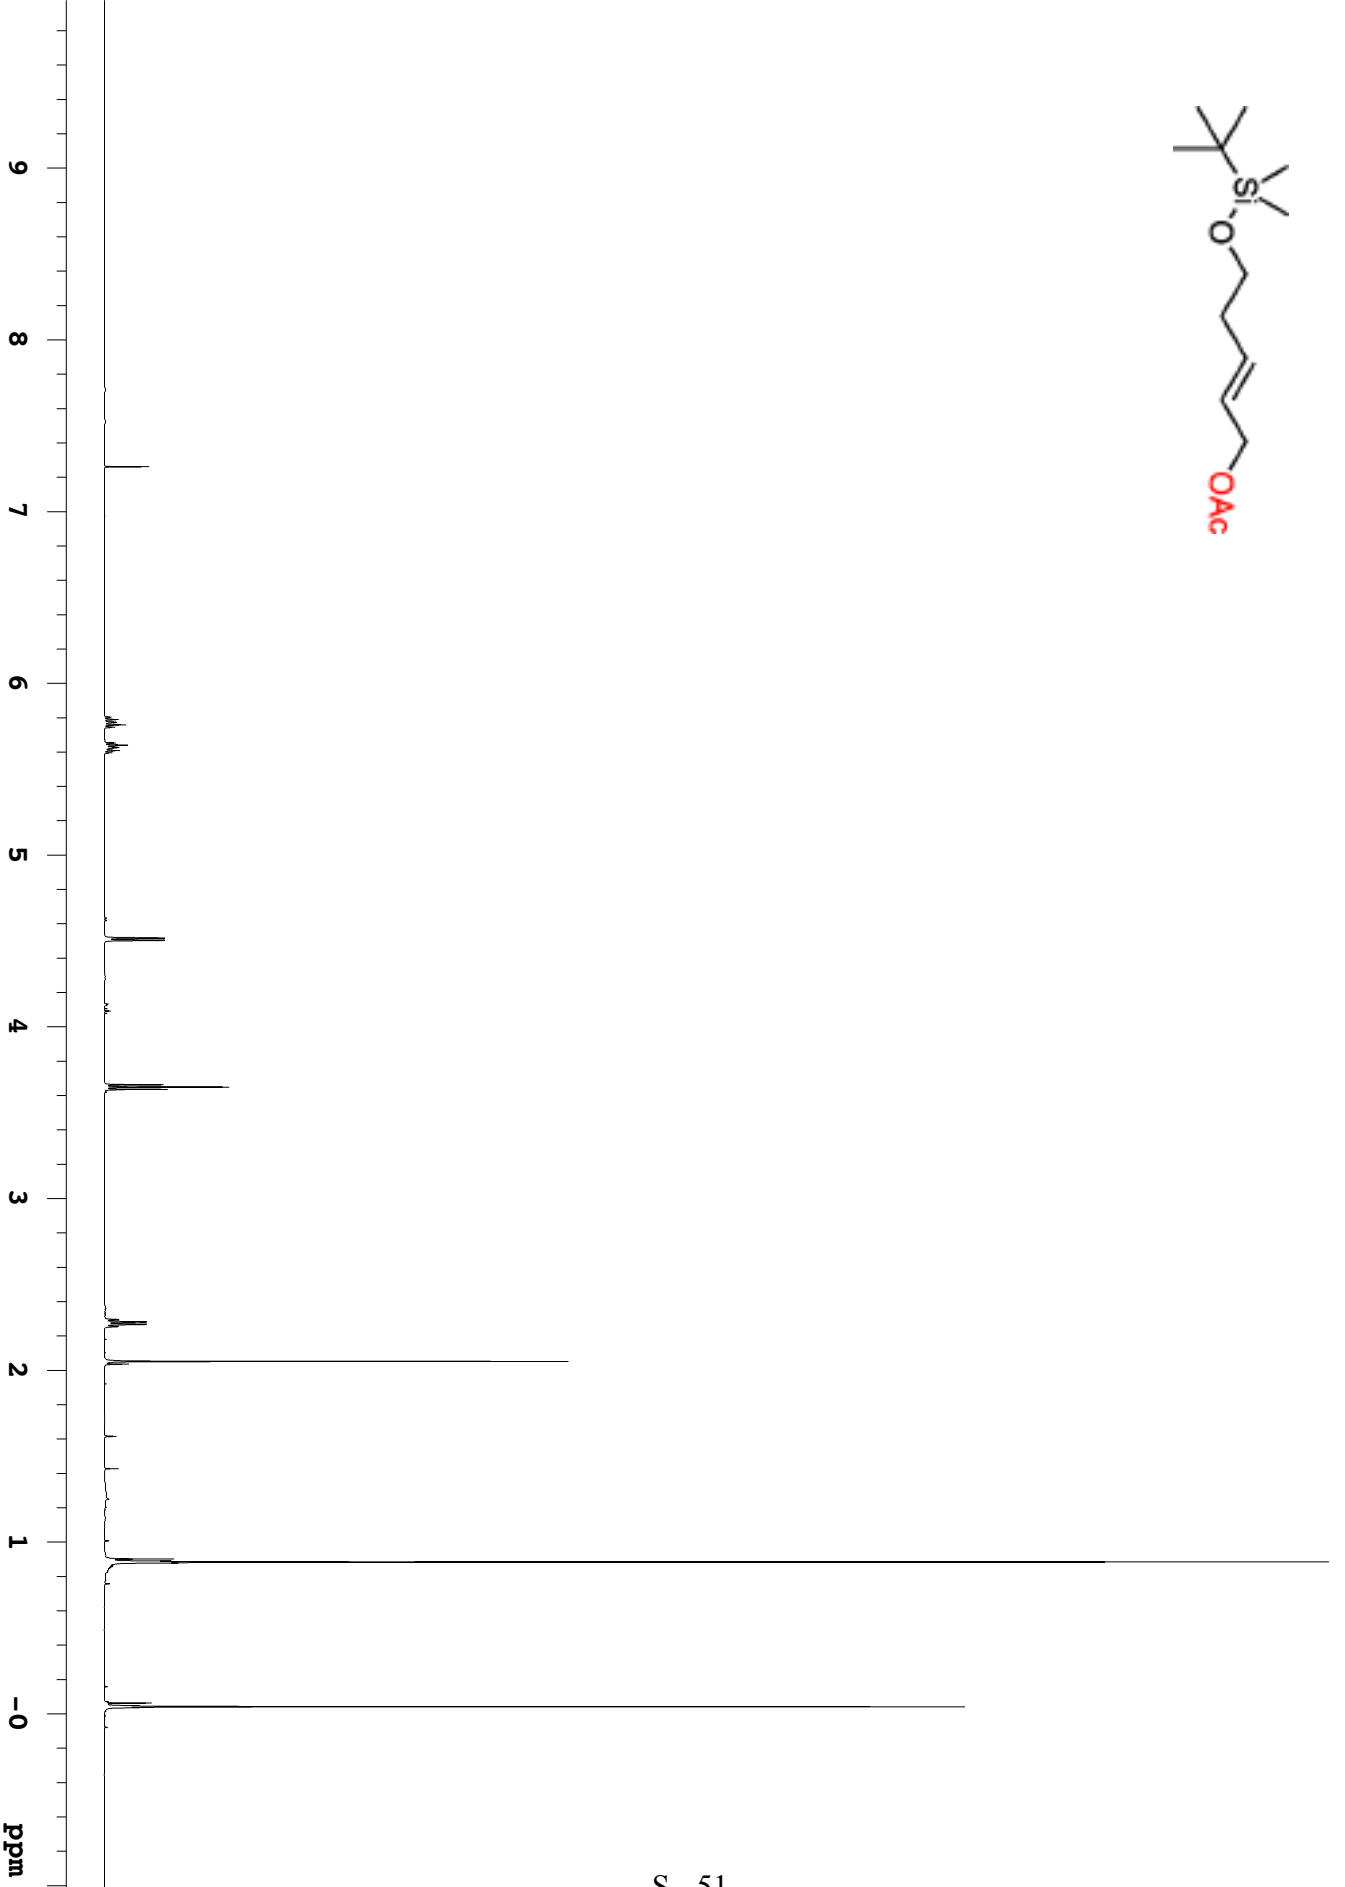



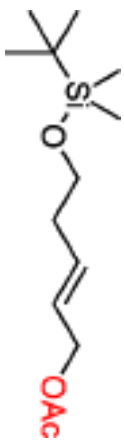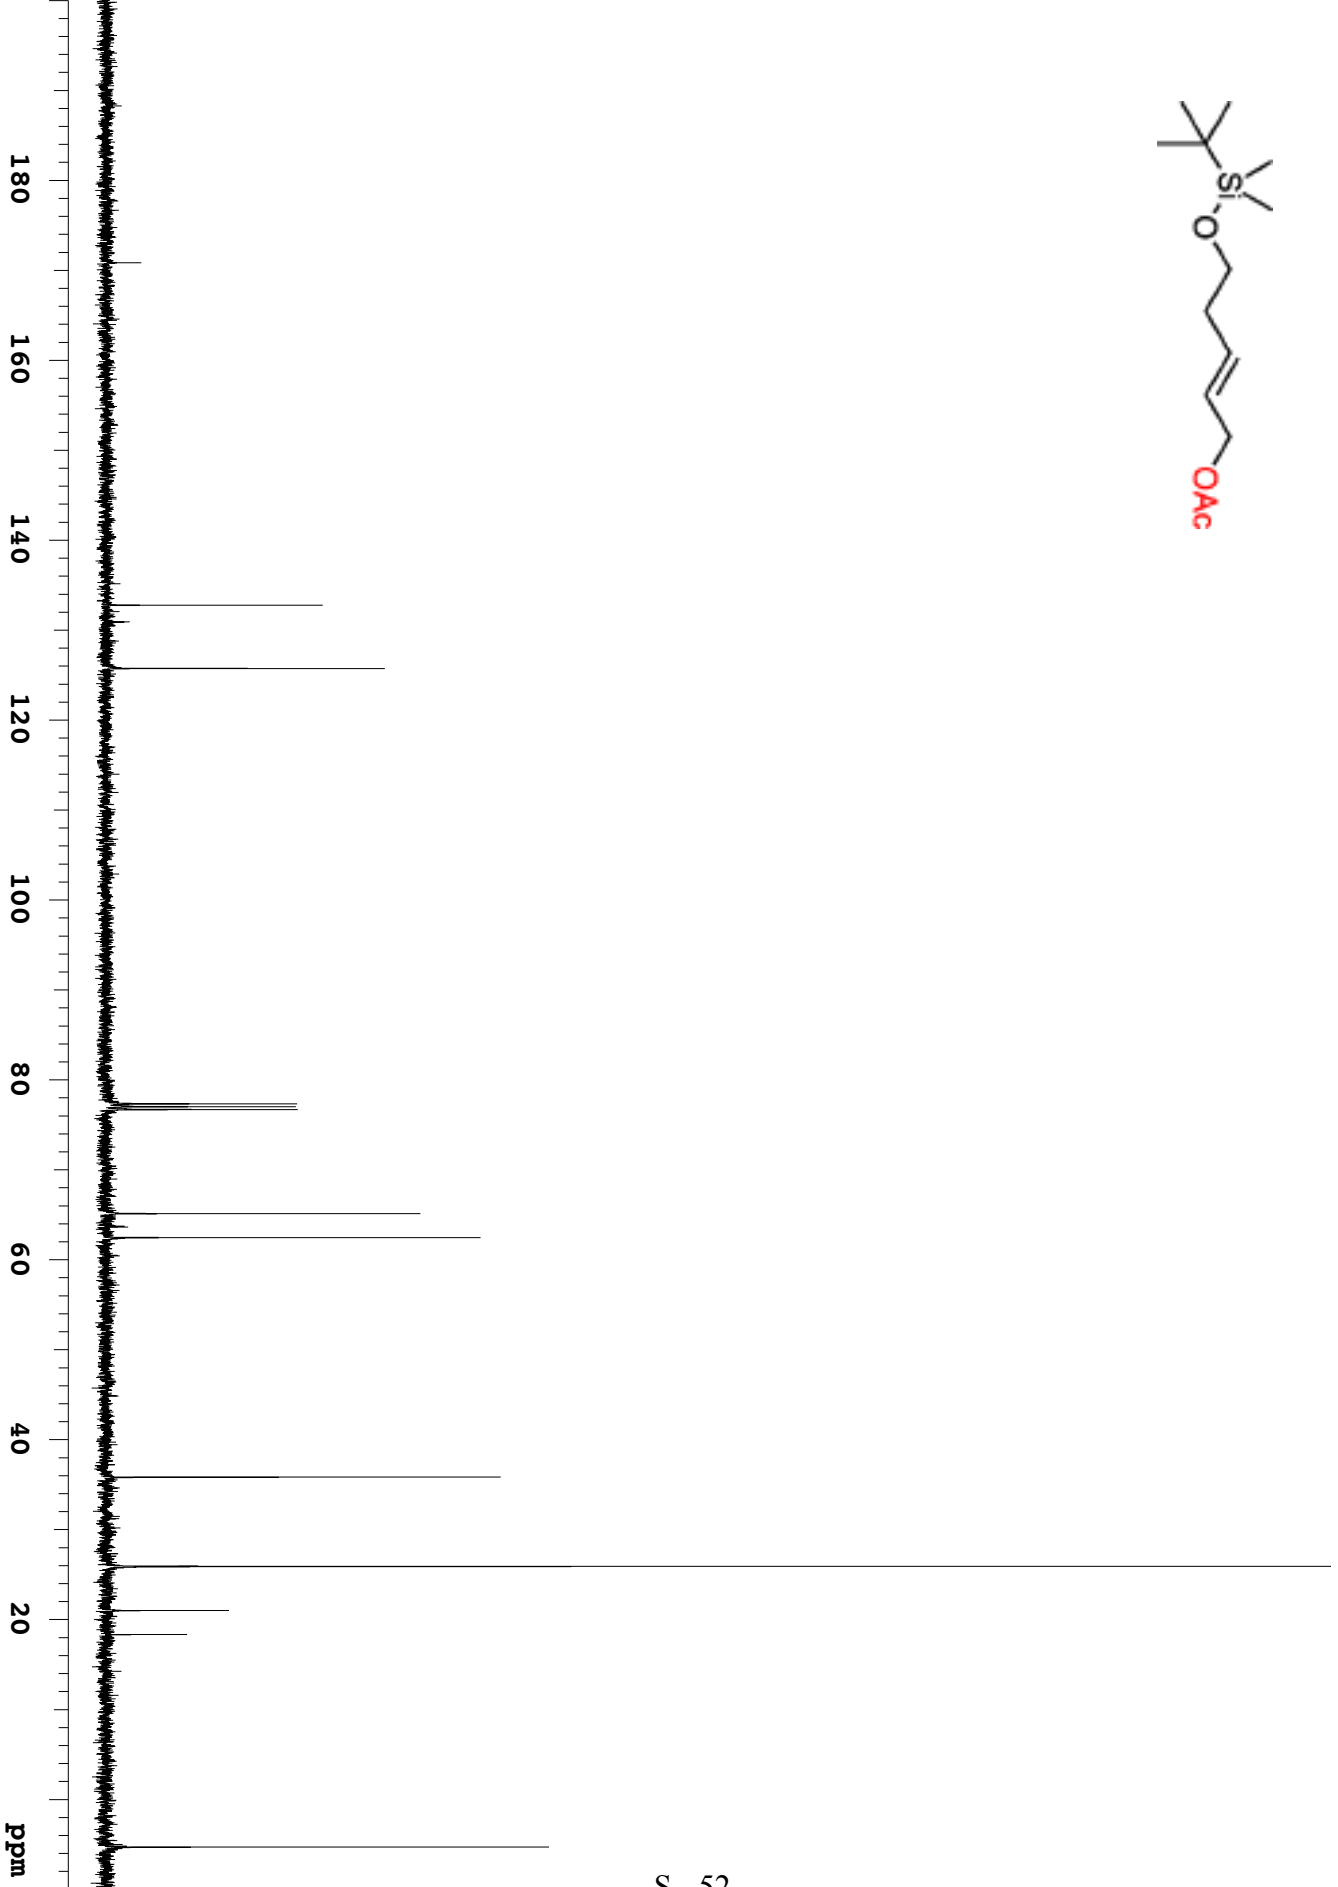

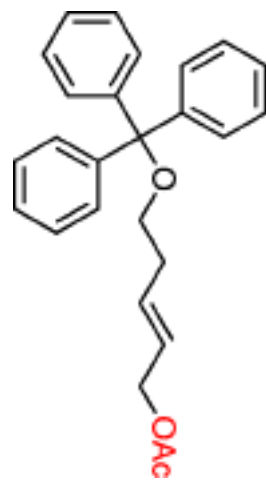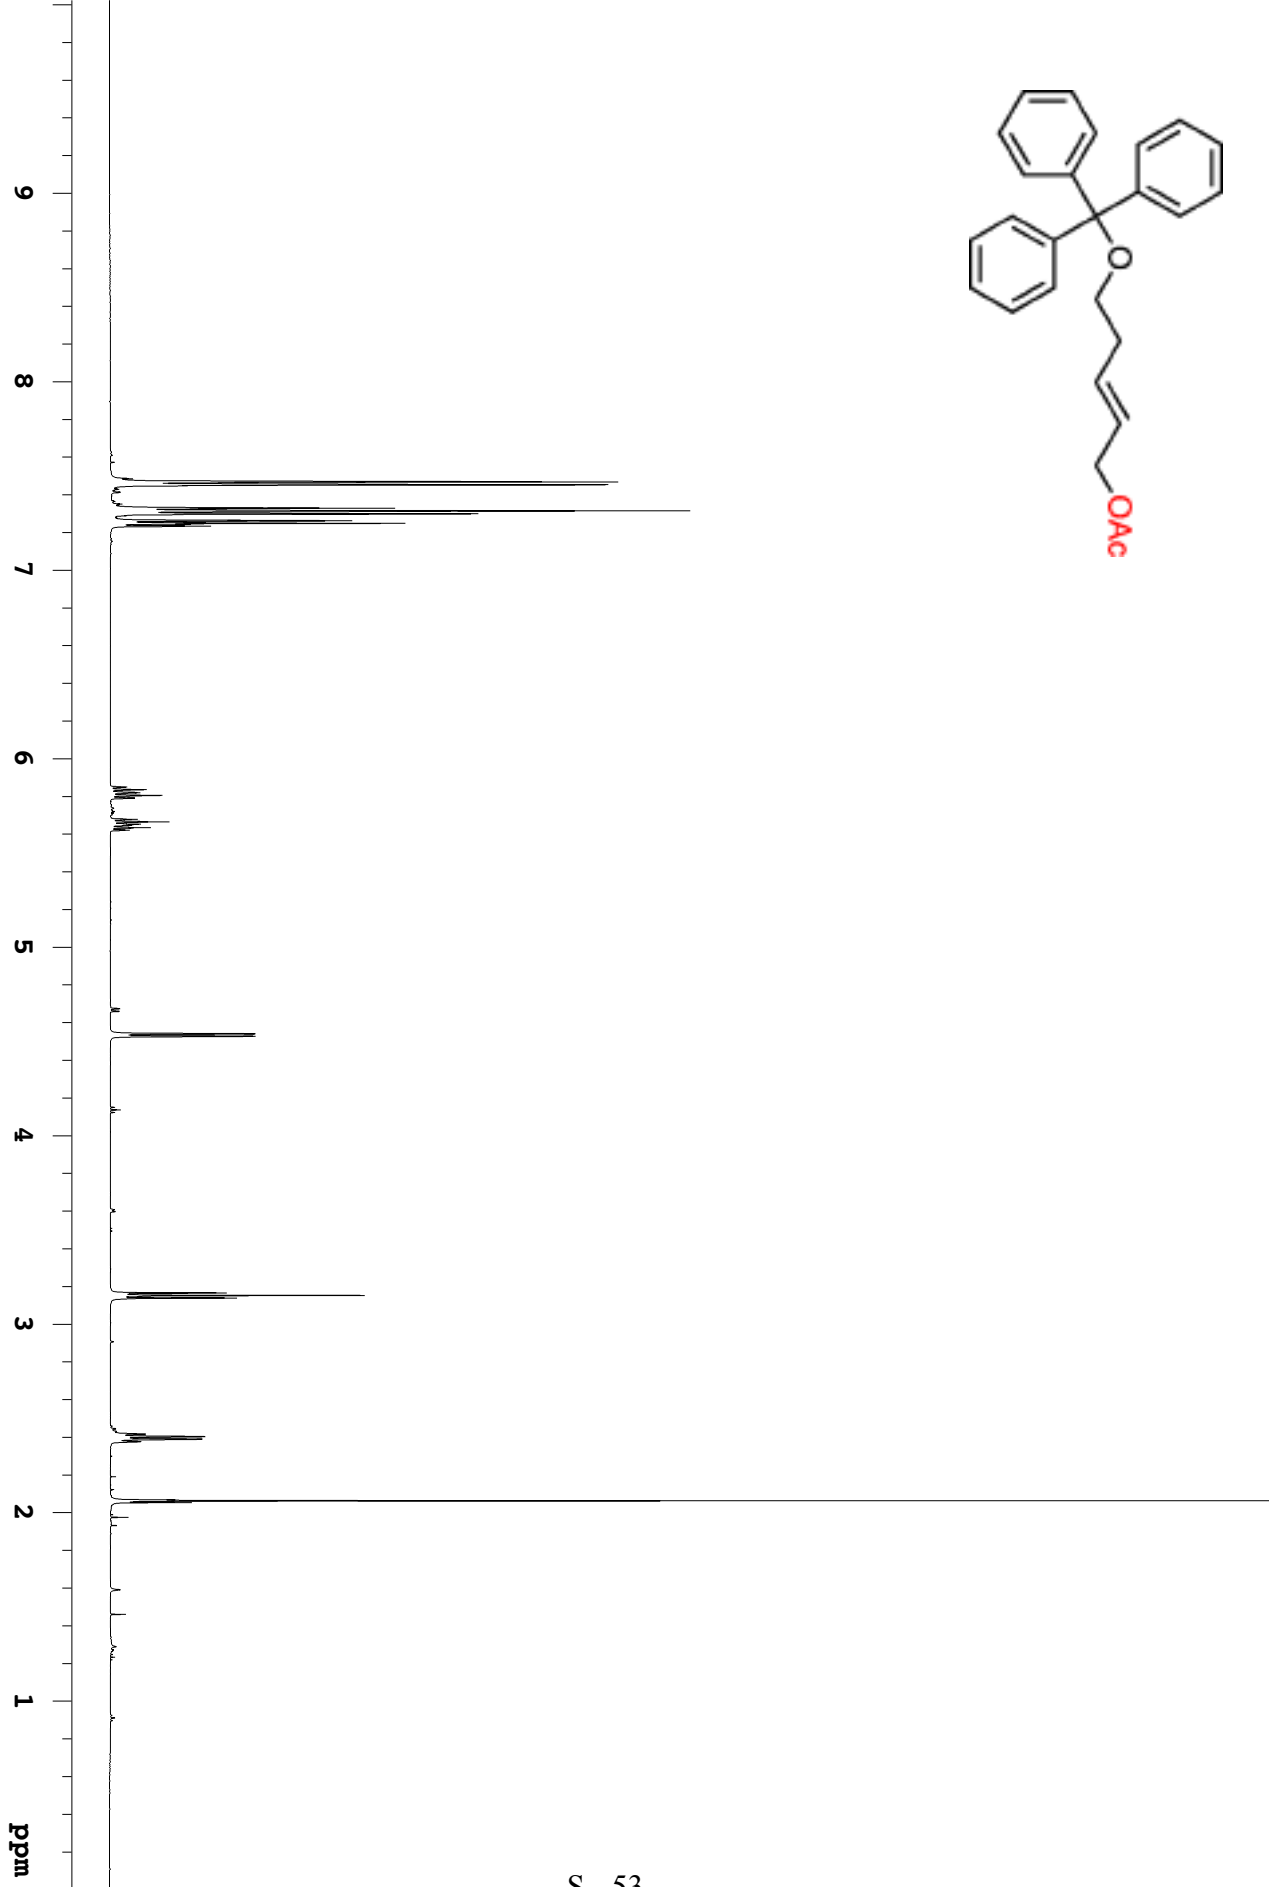

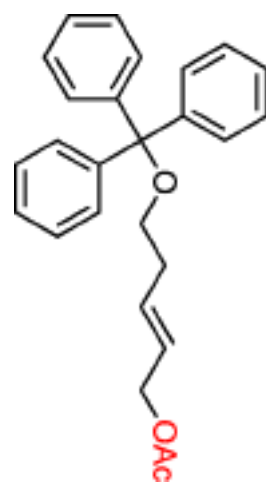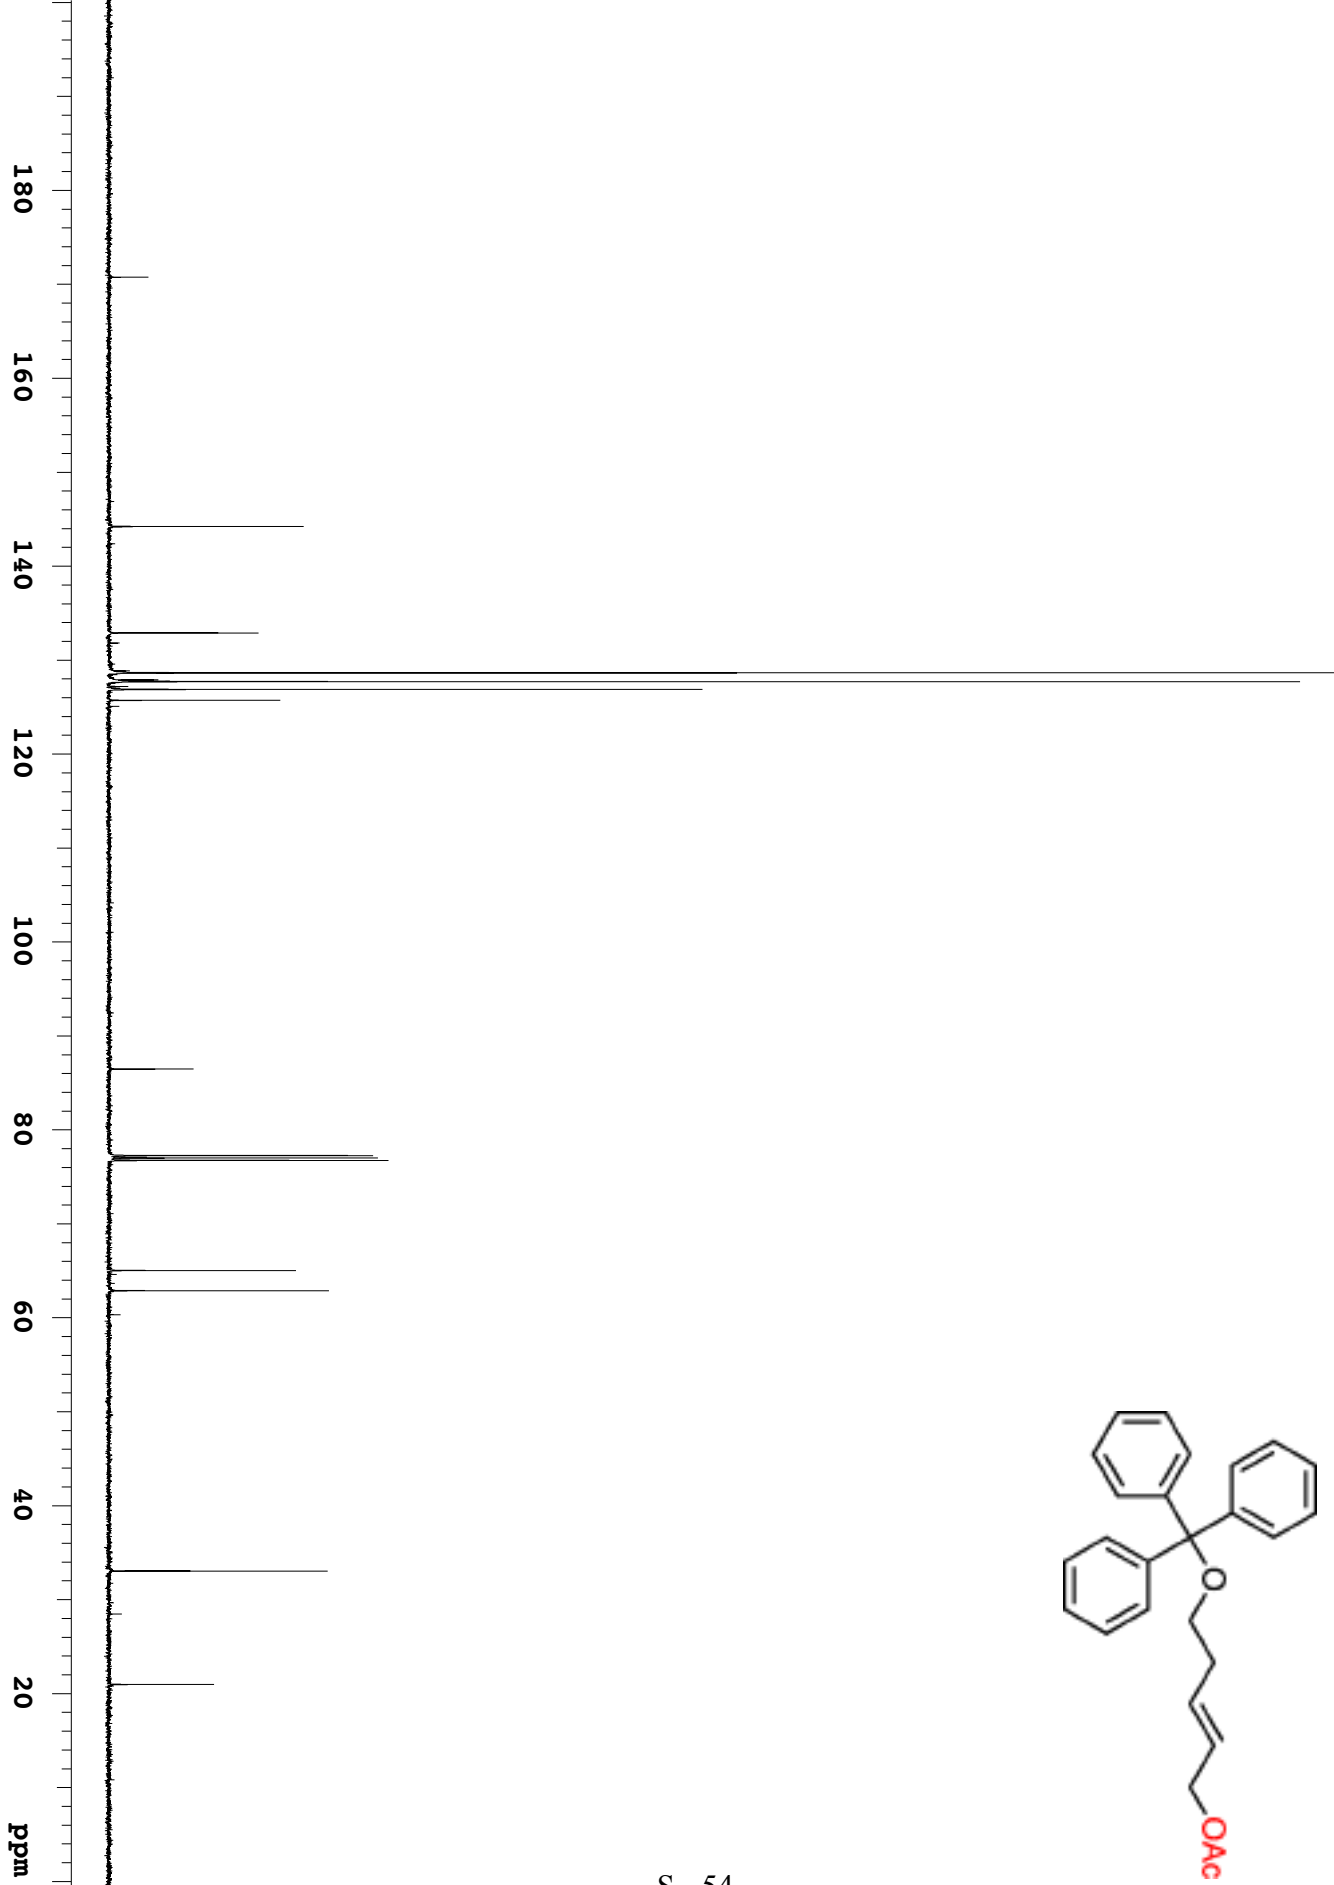

Supplement: NIHMS225470-supplement-2_si_002.pdf [file NIHMS225470-supplement-2_si_002.pdf]
